# The genome of the contractile demosponge *Tethya wilhelma* and the evolution of metazoan neural signalling pathways

Warren R. Francis<sup>1</sup>, Michael Eitel<sup>1</sup>, Sergio Vargas<sup>1</sup>, Marcin Adamski<sup>2</sup>, Steven H.D. Haddock<sup>3</sup>, Stefan Krebs<sup>4</sup>, Helmut Blum<sup>4</sup>, Gert Wörheide<sup>1,5,6</sup>

<sup>1</sup>Department of Earth and Environmental Sciences, Paleontology and Geobiology, Ludwig-Maximilians-Universität München

Richard-Wagner Straße 10, 80333 Munich, Germany

<sup>2</sup>Research School of Biology, College of Medicine, Biology & Environment, Australian National University, Canberra ACT 0200 Australia

<sup>3</sup>Monterey Bay Aquarium Research Institute, Moss Landing, CA 95039, USA

<sup>4</sup>Laboratory for Functional Genome Analysis (LAFUGA), Gene Center, Ludwig-Maximilians-University Munich, Munich, Germany

<sup>5</sup>GeoBio-Center, Ludwig-Maximilians-Universität München, Munich, Germany

<sup>6</sup>Bavarian State Collection for Paleontology and Geology, Munich, Germany

## Abstract

Porifera are a diverse animal phylum with species performing important ecological roles in aquatic ecosystems, and have become models for multicellularity and early-animal evolution. Demosponges are the largest class in sponges, but previous studies have relied on the only draft demosponge genome of *Amphimedon queenslandica*. Here we present the 125-megabase draft genome of the contractile laboratory demosponge *Tethya wilhelma*, sequenced to almost 150x coverage. We explore the genetic repertoire of transporters, receptors, and neurotransmitter metabolism across early-branching metazoans in the context of the evolution of these gene families. Presence of many genes is highly variable across animal groups, with many gene family expansions and losses. Three sponge classes show lineage-specific expansions of GABA-B receptors, far exceeding the gene number in vertebrates, while ctenophores appear to have secondarily lost most genes in the GABA pathway. Both GABA and glutamate receptors show lineage-specific domain rearrangements, making it difficult to trace the evolution of these gene families. Gene sets in the examined taxa suggest that nervous systems evolved independently at least twice and either changed function or were lost in sponges. Changes in gene content are consistent with the view that ctenophores and sponges are the earliest-branching metazoan lineages and provide additional support for the proposed ParaHoxozoa clade.

## Introduction

The presence of neurons is a defining character of animals, and is symbolic of their alleged superiority over all other life on earth. Nonetheless, the four non-bilaterian phyla, Porifera, Placozoa, Ctenophora and Cnidaria, are most different from other animals in their sensory systems and are often considered “lower” animals in common parlance. Indeed, animals such as corals and sponges appear immobile or often unresponsive, challenging early theorists in their ideas of what is and is not an animal. Yet we now know that representatives from all four non-bilaterian phyla demonstrate dynamic responses to outside stimuli.

Neural evolution has been discussed previously in the context of paleontology (reviewed in [Wray et al., 2015]) and metazoan phylogeny (reviewed in [Jékely et al., 2015]). Indeed, it has been suggested that many features of bilaterian neurons and nervous systems represent separate, parallel evolutionary events from a

30 “simple” nervous system. A simple nervous system then must arise from proto-neurons [Schierwater et al.,  
31 2009], however it is unclear what that might look like.

32  
33 Several qualities can be used to define neurons or proto-neurons [Leys, 2015, Nickel, 2010] such as synapses,  
34 electrical excitability, membrane potential, or secretory functions, though no single quality (and ultimately  
35 gene set) solely defines such cells as neurons. Two non-bilaterian groups, ctenophores and cnidarians, are  
36 thought to have true neurons. When considering the remaining two non-bilaterian phyla, sponges and  
37 placozoans, many components of neural cells are found without any neuron-like cells having been identi-  
38 fied [Srivastava et al., 2010, Riesgo et al., 2014a, Leys, 2015], although synapse-like structures have been  
39 identified in placozoan fiber cells that show vesicles close to an osmophile contact [Grell and Benwitz, 1974].  
40

41 Comparative analyses revealed a gradient of neural-like qualities indicating that “neuron-or-not” classi-  
42 fications are not straightforward. While ctenophores, cnidarians, and bilaterians have true neurons, struc-  
43 tural and biochemical differences, [Moroz et al., 2014, Moroz, 2015] led to the proposition that neurons in  
44 ctenophores and cnidarians may not be homologous, but rather separate evolutionary outcomes from neural-  
45 like precursor cells. Potentially, in the case of independent evolutions, neurons are “easy” to evolve, since it  
46 involves co-expression of various pan-metazoan genetic modules in the same cell type. Alternatively, early  
47 rudimentary signaling systems may have been energetically costly and not especially useful in pre-Cambrian  
48 oceans, and in such cases, it may have been comparatively easy to lose such genes and with them neuronal-  
49 type cells.

50  
51 Interpretation of neural evolution requires an accurate metazoan phylogeny, and the phylogenetic relation-  
52 ships of early-branching metazoans have been a topic of continued controversy. Some analyses support the  
53 traditional phylogenetic position of sponges as sister group to all other metazoans (“Porifera-sister”) [Philippe  
54 et al., 2009, Pick et al., 2010, Nosenko et al., 2013, Pisani et al., 2015, Simion et al., 2017] while others suggest  
55 that Ctenophora are the sister group to all other animals (“Ctenophora-sister”) [Dunn et al., 2008, Ryan  
56 et al., 2013, Whelan et al., 2015], and some analyses also recover the classical view, a Coelenterata clade  
57 uniting Cnidaria and Ctenophora [Philippe et al., 2009]. Importantly, phylogenomic analyses can be prone  
58 to systematic artifacts under some circumstances, depending on taxon sampling [Pick et al., 2010, Philippe  
59 et al., 2011], gene set [Nosenko et al., 2013], phylogenetic model [Pisani et al., 2015], or use of nucleotides  
60 instead of proteins [Jarvis et al., 2014]. Other methods based on presence or absence of the genes themselves  
61 have been proposed to provide a sequence-independent inference of phylogeny [Ryan et al., 2010, Ryan et al.,  
62 2013, Pisani et al., 2015], relying on the assumption that gene loss is a rare event. However, non-bilaterians  
63 have the additional problem that basic knowledge of many aspects of their biology is absent [Dunn et al.,  
64 2015], and so the biological context that may separate or unite groups is limited.

65  
66 In the context of phylogeny, the branching order critically affects whether neurons evolved multiple times  
67 or were lost (see schematic in Figure 1). Given the gradient of neural-like qualities, the actual evolutionary  
68 scenario may be somewhere in between a simple gain-loss of neurons. While some previous studies have  
69 focused on neural evolution in ctenophores [Ryan et al., 2013, Alberstein et al., 2015, Li et al., 2015] or  
70 analysing the genomic data from *A. queenslandica* [Krishnan et al., 2014], these alone do not provide a  
71 comprehensive picture of all animals.

72  
73 Here we have sequenced the genome of the contractile laboratory demosponge *Tethya wilhelma* [Sara  
74 et al., 2001] and examined the protein repertoire in the context of genes mediating the contraction, and  
75 other neural-like functions. Many metabolic genes show unique expansions in different sponge clades, as well  
76 as other phyla, making it challenging to clearly assign functions based on similarity to human proteins. We  
77 consider these expansions in the context of phylogenetics, showing that even though sponges lack neurons,  
78 signaling pathways have still expanded. This gives support to the hypothesis that early neural-like cells have  
79 become neurons multiple times in the history of animals.

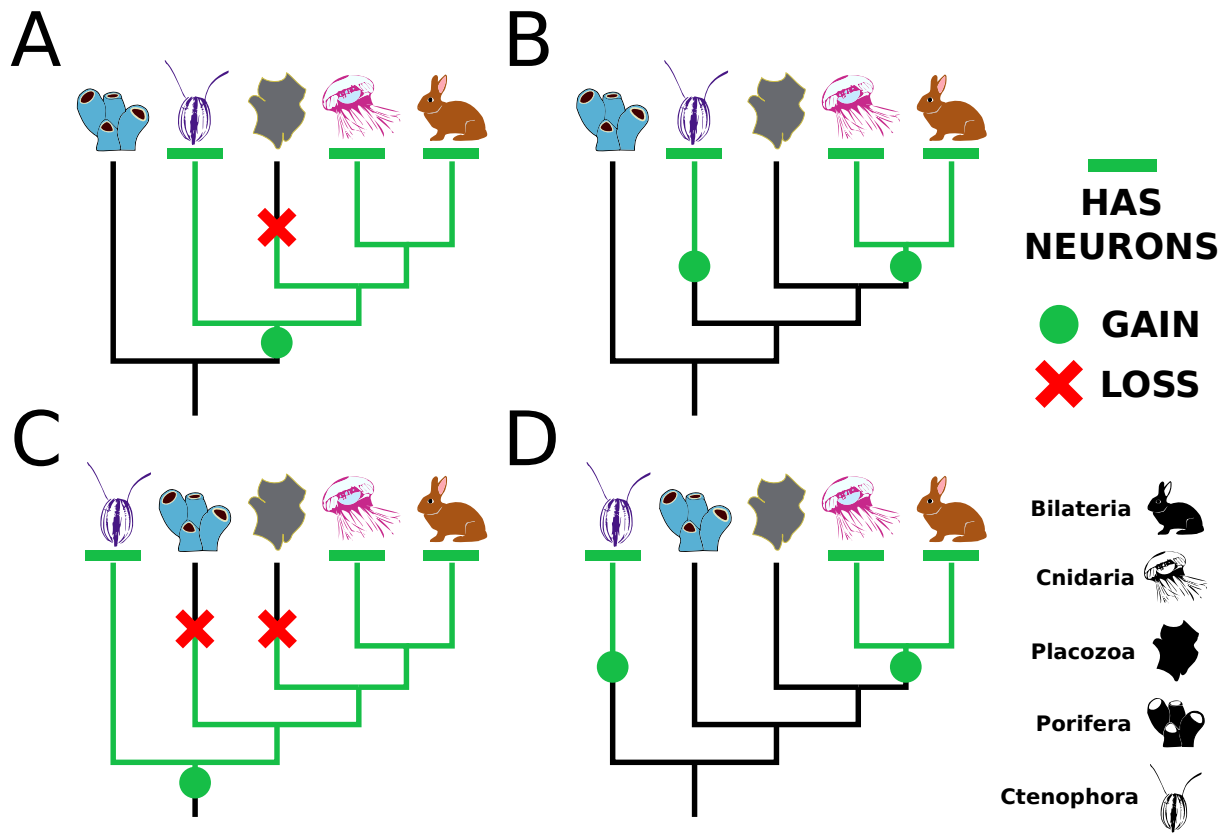

Figure 1: **Schematic of neural evolution depending on metazoan phylogeny** The presence of neurons or neural-like cells in ctenophores, cnidarians, and bilaterians can be viewed differently depending on the phylogeny. Two different metazoan phylogenies based on recent multi-gene phylogenetic analyses are the source of the Porifera-sister (A,B) [Philippe et al., 2009, Pisani et al., 2015, Simion et al., 2017] and Ctenophora-sister (C,D) [Ryan et al., 2013, Whelan et al., 2015] scenarios. Neurons can either have evolved once requiring a secondary loss in sponges, placozoans, or both (A,C), or evolved twice, in ctenophores and in cnidarians/bilaterians (B,D).

## 80 Results

### 81 Genome assembly and annotation

82 We generated a total of 61 gigabases of paired-end reads from a whole specimen of *T. wilhelma* (Figure 2)  
 83 and all associated bacteria. Because of a close association with microbes, some contigs were expected to  
 84 have derived from bacteria, as many reads have unexpectedly high GC content (Supplemental Figures 1-4).  
 85 After assembly and filtration of bacterial contigs, the final assembly was 125Mb, similar to *A. queenslandica*,  
 86 with a N50 value of 70kb (Supplemental Table 1). Gene annotation was done with a combination of a  
 87 deeply-sequenced RNAseq library from an adult sponge and *ab initio* gene predictions. Because of high  
 88 density of genes, extensive manual curation was often necessary to correct genes of the same strand that  
 89 were erroneously merged. After correction and filtering of the *ab initio* predictions, we counted 37,416  
 90 predicted genes, comparable with the counts in *A. queenslandica* (40,122) [Fernandez-Valverde et al., 2015]  
 91 and *S. ciliatum* (40,504) [Fortunato et al., 2014].

92 General trends in splice variation were similar between *T. wilhelma* and *A. queenslandica* (Supplemental  
 93 Tables 2 and 3), suggesting similar underlying biology or genome structure. One-to-one orthologs from *T.*  
 94 *wilhelma* and *A. queenslandica* had relatively low identity (Supplemental Figure 5), with the average identity  
 95 of 57.8%, showing a high genetic diversity within Porifera. The average identity is lower when compared to

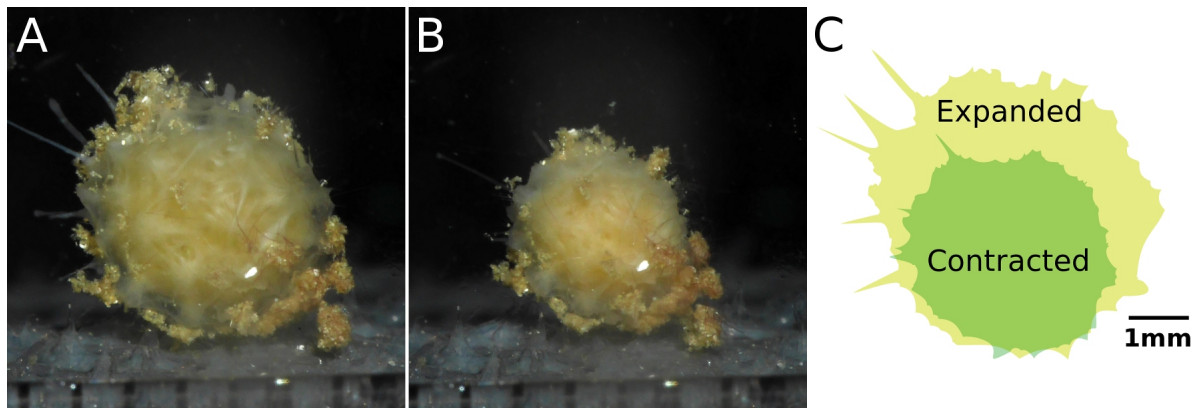

Figure 2: **Contraction of a normal specimen** (A) Maximally expanded state of *Tethya wilhelma*. (B) The same specimen approximately an hour later in the most contracted state. (C) Cartoon view of most contracted versus expanded state. Scale bar applies to all images. Photos courtesy of Dan B. Mills.

96 *S. ciliatum* (49.7%), *N. vectensis* (53.5%) and human (52.0%), which is not surprising given that *A. queens-*  
97 *landica* and *T. wilhelma* are both demosponges. Although both genomes are too fragmented to find syntenic  
98 chromosomal regions, ordered blocks of genes are still identifiable between *T. wilhelma* and *A. queenslandica*  
99 (Supplemental Figure 6), though not with *S. ciliatum*.

100

## 101 Neurotransmitter metabolism across early-branching metazoans

102 Compared to most other metazoans, sponges have a limited set of behaviors (contraction, closure of osculum  
103 or choanocyte chambers to control flow), yet respond to many signaling molecules present in bilaterians [Ell-  
104 wanger and Nickel, 2006, Ellwanger et al., 2007]. Some genes involved in vertebrate-like neurotransmitter  
105 metabolism have been found in sponges [Riesgo et al., 2014a, Krishnan and Schiöth, 2015]. although many  
106 display a sister-group relationship to homologs found in other animals and appear to have a complex evo-  
107 lutionary history with duplications in sponges and other non-bilaterian animals (Figure 3, Supplemental  
108 Figures 7-9), making the prediction of their functions difficult. Thus, declaring presence or absence of any  
109 individual gene or genetic module is not correct in the strictest sense, since these proteins are often many-to-  
110 many orthologs to human proteins with known functions, and it is not possible to computationally predict  
111 which, if any, of the sponge orthologs shares its function with the human protein.

112

113 For instance, biosynthesis of monoamine neurotransmitters (dopamine, serotonin, etc.) requires two  
114 enzymes, tryptophan hydroxylase and tyrosine hydroxylase. These two enzymes appear to have arisen in  
115 bilaterians from duplications of an ancestral phenylalanine hydroxylase [Cao et al., 2010], though evidence  
116 is lacking as to whether this ancestral protein had multiple functions that specialized after duplication (sub-  
117 functionalization) or developed new functions (neofunctionalization) post-duplication. The absence of these  
118 proteins in non-bilaterians seems to be ancestral; in other words, they had not evolved yet when these groups  
119 split and diversified.

120

121 Among other non-bilaterians, some monoamine neurotransmitters are found in cnidarians [Carlberg and  
122 Rosengren, 1985], but are mostly absent in ctenophores (or at detection limit) [Moroz et al., 2014]. Indeed,  
123 previous studies were unable to find homologs of DOPA decarboxylase (AADC, Supplemental Figure 8),  
124 dopamine  $\beta$ -hydroxylase (DBH, Supplemental Figure 7), monoamine oxidase (MAO, Supplemental Fig-  
125 ure 9), or tyrosine hydroxylase (TH) in the genome of the ctenophore *M. leidyi* or any available ctenophore  
126 transcriptome, and it was suggested that some of these proteins were absent in sponges as well (see Supple-  
127 mentary Tables 17 and 19 in [Ryan et al., 2013]). However, we found orthologs of MAO and homologs of  
128 AADC and DBH in several sponges, though it is unclear if they perform the same function as the human  
129 proteins. Additionally, homologs of four enzymes, AADC, MAO, DBH, and ABAT, are present in single-

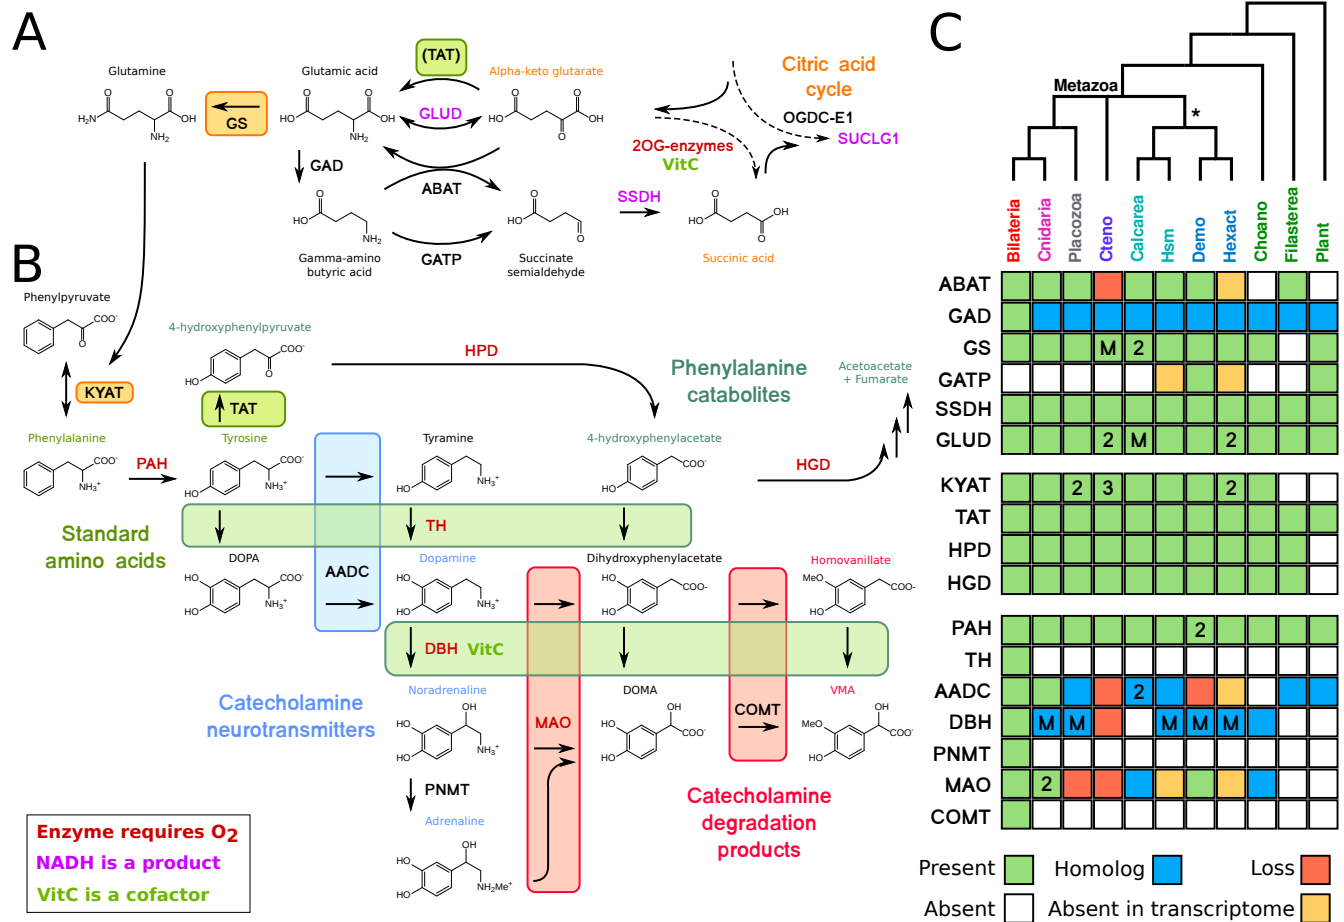

**Figure 3: Neurotransmitter overview across metazoans** Summary schematic of neurotransmitter biosynthesis and degradation pathways across early-branching metazoans. Each of the four non-bilaterian groups is presumed to be monophyletic, although some individual trees of genes or gene families may display alternate topologies. Bold letters refer to the enzymes. Individual gene trees that display the orthology of the clades are found in the supplemental information. Arrows are shown in one direction though many reactions can be reversible. (A) Glutamate and GABA metabolism from the citric acid cycle through the “GABA shunt” pathway. Because ABAT is absent in ctenophores, GLUD and TAT are potentially alternatives to convert  $\alpha$ -ketoglutarate to glutamate. GATP can convert GABA to succinate semialdehyde, but this enzyme was only found in some demosponges and plants. (B) Monoamine metabolism, excluding tryptophan. (C) Table of presence-absence for genes in parts A and B. Presence (green) refers to a 1-to-1 ortholog where orthology is clear from the tree position. Homolog (blue) refers to a sister group position in trees before duplications with different or unknown functions. Secondary loss (red) refers to the gene missing in the clade, but homologs are found in non-metazoan phyla. Numbers inside the boxes indicate copy number specific to that group, M refers to multiple duplications within the group where the copy number is variable among species. Abbreviations for clades are as follows: Cteno, ctenophores; Hsm, homoscleromorphs; Demo, demosponges; Hexact, hexactinellids; Choano, choanoflagellates.

130 called eukaryotes but not ctenophores, implying a secondary loss of these protein families in this phylum.

131



## 132 GABA receptors

133 The neurotransmitter gamma-amino butyric acid (GABA) has been shown to affect contraction in *T. wil-*  
134 *helma* [Ellwanger et al., 2007] and the freshwater sponge *E. muelleri* [Elliott and Leys, 2010]. The genome of  
135 *T. wilhelma* contains metabotropic receptors (GABA-B, mGABARs), but not ionotropic GABA receptors  
136 (GABA-A, iGABARs). While humans have two mGABARs and the ctenophore *M. leidyi* has only one, the  
137 *T. wilhelma* genome has nine. Sponges appear to have undergone a large expansion of this protein family  
138 (Figure 4), similar to the expansion of glutamate-binding GPCRs previously observed in sponges [Krishnan  
139 et al., 2014]. Based on the structure of the binding pocket of human GABAR-B1 [Geng et al., 2013], many  
140 differences are observed across the mGABAR protein family, even showing that many residues involved in  
141 coordination of GABA are not conserved between the two human proteins or all other animals (Supple-  
142 mental Figure 11). Contrary to previous reports [Ramoino et al., 2010], we were unable to find normal  
143 mGABARs in the two calcareous sponges *S. ciliatum* and *L. complicata*. Instead, in these two species, the  
144 best BLAST hits from human GABA-B receptors (the putative mGABARs) had the best reciprocal hits to  
145 Insulin-like growth-factor receptors. Structurally, this was due to the normal seven-transmembrane domain  
146 being swapped with a C-terminal protein kinase domain (Figure 5), meaning these are not true metabotropic  
147 GABA receptors. Similarly, in the filasterean *Capsaspora owczarzaki*, the N-terminal ligand binding domain  
148 is also exchanged with other domains, suggesting as well that these are not true metabotropic GABA recep-  
149 tors.

150

## 151 Glutamate receptors

152 Glutamate is of particular interest as it is a key metabolic intermediate and the main excitatory neurotrans-  
153 mitter in animal nervous systems, acting on two types of receptors: the metabotropic glutamate receptors  
154 (mGluRs) and the ionotropic ones (iGluRs). Some sponge species possess iGluRs, though these receptors  
155 were absent in the transcriptomes of several demosponges [Riesgo et al., 2014a]. We were unable to find  
156 iGluRs in the genome of *T. wilhelma*, in the genome and transcriptomes of any other demosponge, or in the  
157 genomes of two choanoflagellates (*M. brevicollis* and *S. rosetta*). The top BLAST hits in demosponges have  
158 a GPCR domain instead of the ion channel domain, indicating that these are not true iGluRs (Supplemental  
159 Figure 13). Because the domain structure in plants is the same as most animal iGluRs, the ligand binding  
160 domain was swapped out in demosponges.

161

162 The homoscleromorpha/calcareous clade appears to have an independent expansion of iGluRs (Supplemen-  
163 tal Figure 12), though the normal ion transporter domain is switched with a SBP-bac-3 domain (PFAM  
164 domain PF00497) compared to all other iGluRs (Supplemental Figure 13). Additionally, ctenophores and  
165 placozoans appeared to have dramatic expansions of this protein family as well [Ryan et al., 2013, Moroz  
166 et al., 2014, Alberstein et al., 2015], suggesting that a small set of iGluRs was present in the common ancestor  
167 of eukaryotes and have diversified multiple times in both plants and animals, while other clades appear to  
168 have modified or lost these proteins.

169

## 170 Vesicular transporters

171 Secretory systems are a common feature of all eukaryotes, as most cells have endoplasmic reticulum to secrete  
172 proteins or make membrane proteins. Neurons secrete peptides (conceptually identical to any other protein)  
173 or small-molecule neurotransmitters in a paracrine fashion, specifically to other neural cells. Compared to  
174 peptides, small-molecule neurotransmitters need to be loaded into vesicles by dedicated transport proteins.  
175 Vesicular glutamate transporters (VGluTs, SLC17A6-8) are part of a superfamily of transporters [Sreedha-  
176 ran et al., 2010] that carry glutamate, aspartate, and nucleotides. The position of sponge proteins in the tree  
177 is inconsistent with a clear role in glutamate transport (Supplemental Figure 14), as several sponge clades  
178 and ctenophores occur as sister group to multiple duplications. Transporters in sponges, ctenophores, and  
179 choanoflagellates may well act upon glutamate or other amino acids, but this needs to be experimentally  
180 investigated.

181

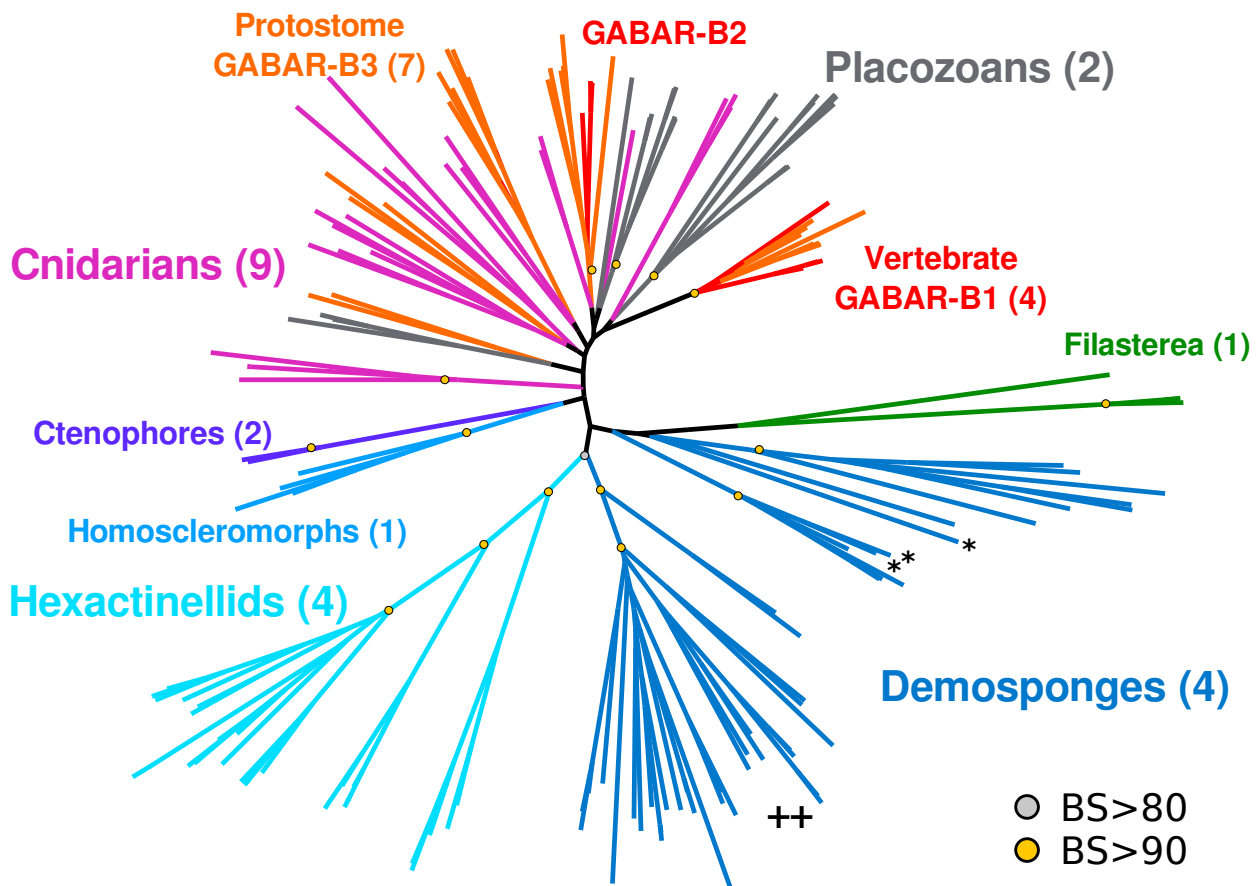

Figure 4: **Metabotropic GABA receptors (GABA-B type) across metazoans** Protein tree generated with RAxML. Numbers in parentheses indicate the number of species from that group, so the 46 demosponge mGABARs come from 4 species. Key bootstrap values are summarized as yellow or gray dots, for values of 90 or more, or 80 or more, respectively. Single star indicates sequences annotated as mGABARs in [Krishnan et al., 2014], double plus indicates the clade annotated as “sponge specific expansion” in [Krishnan et al., 2014]. For complete version with protein names and all bootstrap values, see Supplemental Figure 10

182 Similar to glutamate, GABA is loaded into vesicles with the vesicular inhibitory amino acid transporter  
 183 (VIAAT). Ctenophores, sponges, and placozoans lack one-to-one homologs of VIAAT (Supplemental Fig-  
 184 ure 15). Several other transporters are thought to transport GABA (ANTL or SLC6 class) and many other  
 185 amino acids. SLC6-class transporters, which transport diverse amino acids, are found in all non-bilaterian  
 186 groups, so the function of VIAAT may be redundant.

### 187 Glycine receptors

188 Glycine is known to affect the contraction of *T. wilhelma* [Ellwanger and Nickel, 2006]. Some ctenophore  
 189 iGluRs have been shown to bind glycine [Alberstein et al., 2015] due to the substitution of serine for arginine  
 190 (S687 in human GluN1), though this appears to be specific only to ctenophores, as essentially all other  
 191 iGluRs have the conserved serine/threonine at this position. Because no ionotropic glycine receptors could  
 192 be identified in the *T. wilhelma* genome (or any other sponges, ctenophores or placozoans), other proteins  
 193 may be responsible for mediating this effect.

194

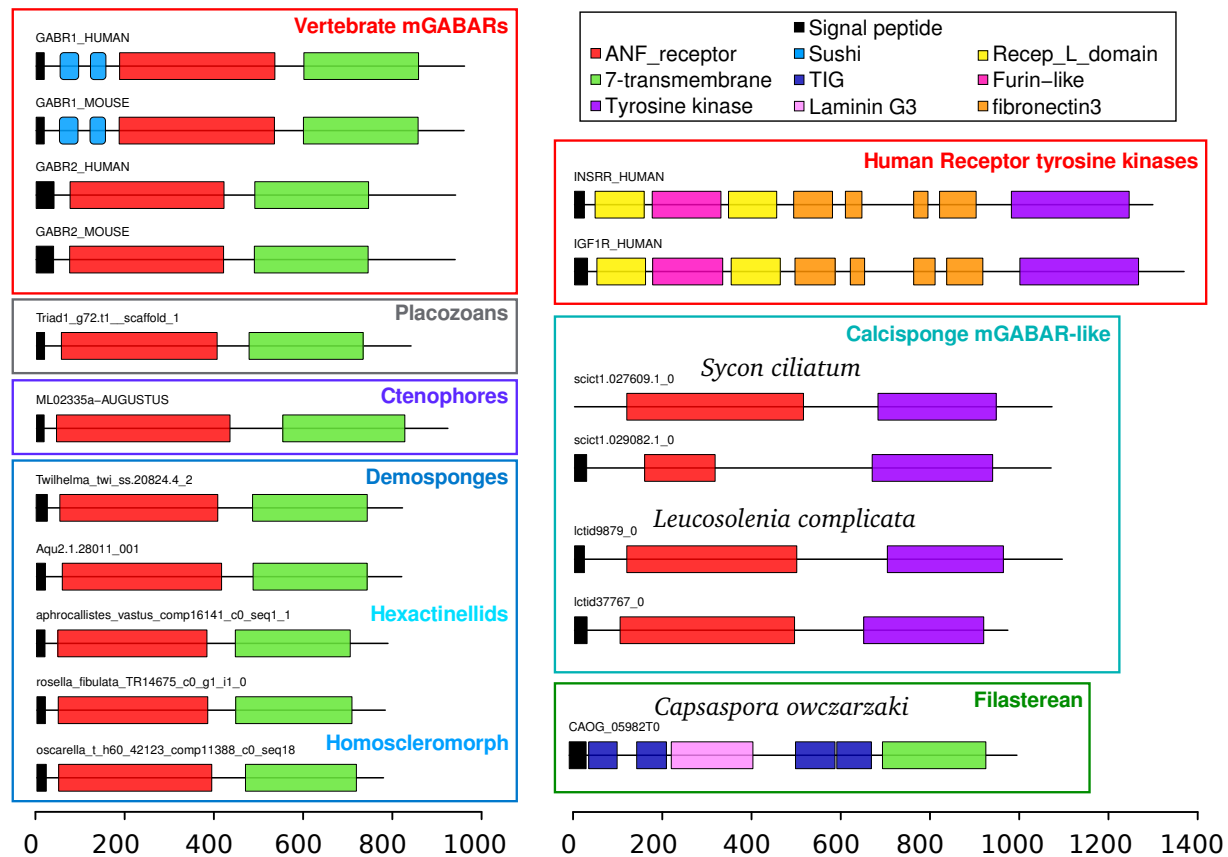

Figure 5: Domain organization of GABA-B type receptors across metazoans

Scale bar displays number of amino acids. Top reciprocal BLAST hits to human for putative mGABARs in calcareous sponges are INSRR and IGF1R, due to high-scoring hits to the tyrosine kinase domain. All mGABARs from demosponges, glass sponges, and the homoscleromorph *Oscarella carmela* share the 7-transmembrane domain (green) with mGABARs from other animals, while calcisponge proteins have the same ligand-binding domain (red) but instead have a protein tyrosine kinase domain (purple) at the C-terminus, similar to growth-factor receptors. The filasterean *Capsaspora owczarzaki* has alternate domains at the N-terminus.

## 195 Mechanical receptors

196 Some sponges can contract in response to mechanical agitation, as reported for the demosponges *E. muel-*  
 197 *leri* [Elliott and Leys, 2007] and *T. wilhelma* [Nickel, 2010]. Several diverse protein families appear to  
 198 be responsible for the sense of touch [Árnadóttir and Chalfie, 2010]. A subgroup of the TRP (transient  
 199 receptor-potential) channels, TRP-N, thought to mediate mechanosensation was determined to be absent  
 200 in sponges [Schuler et al., 2015], and we were unable to identify any in either *T. wilhelma* or *S. ciliatum*,  
 201 although other TRP-class channels were found [Ludeman et al., 2014, Schuler et al., 2015]. Because the  
 202 mechanosensory function of TRP channels may be redundant, we analysed for the presence of PIEZO, a  
 203 280kDa trimeric protein [Ge et al., 2015] involved in touch sensation in mammals [Coste et al., 2012]. Al-  
 204 though two homologs were found in vertebrates, we found one copy in all other animals (Supplemental  
 205 Figure 16) as well as fungi, plants and most other eukaryotic groups, suggesting an ancient and conserved  
 206 function of this protein.

207



## 208 Voltage-gated channels

209 Voltage-gated ion channels are necessary for the propagation of electrical signals down axons and dendrites  
210 [Zakon, 2012, Moran et al., 2015], and have specificities for sodium, potassium, or calcium. Previous analyses  
211 were unable to clearly identify potassium or sodium channels in sponges [Liebeskind et al., 2011]; only one  
212 partial potassium channel was found in the transcriptome of the homoscleromorph *Corticium candelabrum*  
213 [Riesgo et al., 2014a, Li et al., 2015]. We were unable to find any voltage-gated sodium or potassium channels  
214 in the genome or transcriptome of any sponge. We then examine voltage-gated hydrogen channels (*hvcn1*), as  
215 these proteins have been found in a number of single-celled eukaryotes [Smith et al., 2011], and are extremely  
216 conserved. These channels were found in all sponge groups, although the high protein identity resulted in a  
217 poorly-resolved tree (Supplemental Figure 19).

218 Reports of action potentials in hexactinellids [Leys et al., 1999, Leys et al., 2007, Nickel, 2010] showed that  
219 sponge action potentials were inhibited by divalent cations [Leys et al., 1999], suggesting a role of calcium  
220 channels instead. Because voltage-gated sodium and calcium channels arose from a duplication event [Gur  
221 Barzilai et al., 2012], the ion selectivity may be variable within this protein family. Most sponges have only a  
222 single CaV-channel (Supplemental Figure 18) and several Hv-channels, and no voltage-gated channel of any  
223 kind was found in any glass sponge. However, all glass sponge sequences are from transcriptomes, therefore  
224 either the expression level of the true channels is low in glass sponges, or they have independently evolved  
225 another mechanism to propagate action potentials.

226

## 227 Discussion

### 228 Gene content variation of metazoa

229 Among the thousands of genes in the genome, we focused on genes that may be mediating contractile be-  
 230 havior in *T. wilhelma*, and the interactions of those genes within broader metabolic pathways. Many of the  
 231 “housekeeping” genes in our study have lineage-specific duplications in at least one animal phylum. Consid-  
 232 ering the importance of “single-copy” proteins in phylogenetic analyses, as taxon sampling improves, it may  
 233 be found that very few or no genes are single copy across most or all animal phyla. Many other genes that  
 234 are critical for neural functioning in bilaterians have independent losses in other animal lineages (Figure 6).  
 235

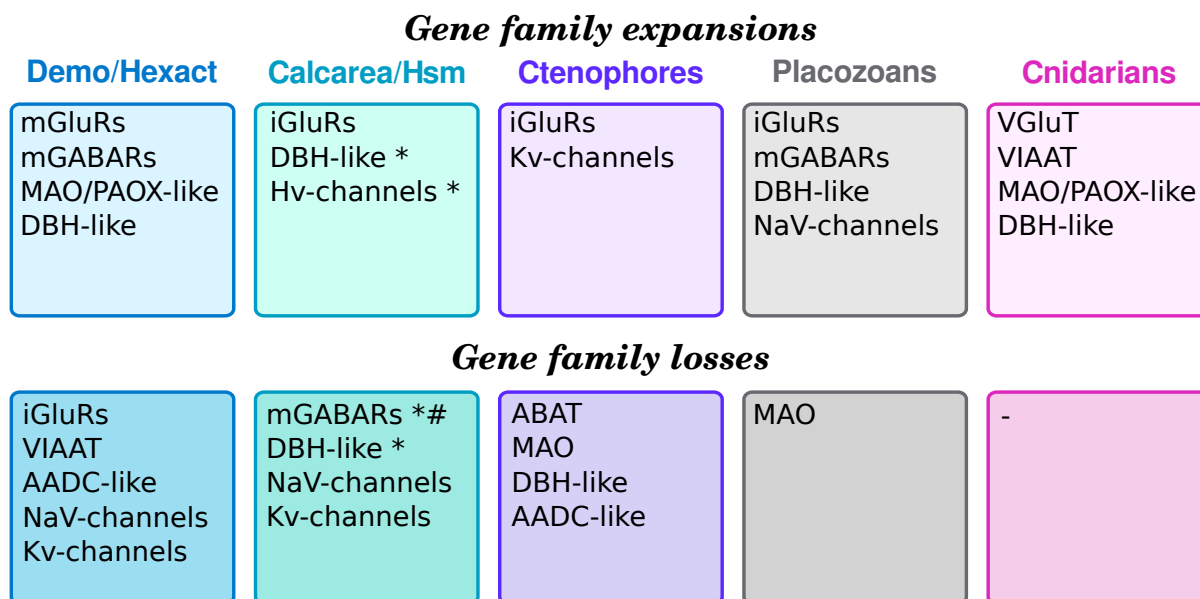

Figure 6: Summary of gene expansions and losses

Demo/Hexact refers to the clade of demosponges and glass sponges. Calcarea/Hsm refers to the unnamed clade of calcareous sponges and homoscleromorphs. The star indicates that expansion or loss was found in one class but not the other. Number sign indicates the domain rearrangement in calcisponges.

### 236 Glutamate and GABA receptor evolution

237 There is stark contrast in the relative abundance of mGABARs and iGluRs in sponges and ctenophores.  
 238 The relative dearth of mGABARs in ctenophores may reflect the apparently absence of amino-butyrate  
 239 amino-transferase (ABAT) in ctenophores, suggesting that ctenophores use an alternate pathway to produce  
 240 glutamate or metabolize GABA (Figure 3), rarely use GABA as a neurotransmitter, or simply are missing  
 241 this pathway. Other aminotransferases such as GLUD or TAT may perform some of the exchange between  
 242  $\alpha$ -ketoglutarate and glutamate, particularly as ctenophores have two copies of GLUD while most animals  
 243 have only one. Ctenophores also have multiple (variable) copies of glutamate synthase and three copies of  
 244 KYAT one of which may serve to balance glutamate metabolism in these animals.

245  
 246 There are two explanations for the diversity of mGABARs in sponges. Given the high variability of  
 247 amino acids in the mGABAR binding pocket (Supplemental Figure 11), it is plausible that many of these  
 248 receptors do not bind GABA at all, and have diversified for other ligands. There is precedent for this as it  
 249 was shown that the independent expansion of ctenophore iGluRs also included several key mutations to the  
 250 binding pocket which changed the ligand specificity of these proteins [Alberstein et al., 2015]. For the other

251 hypothesis, all of the receptors could bind GABA, essentially mediating the same contraction signal, but  
252 their kinetics could differ and be influenced by factors such as, for instance, temperature. Because sponges  
253 are mostly immobile, they often can be subject to environment variation in terms of light, oxygen, and  
254 temperature. The possession of a set of proteins capable of triggering the same response (e.g. contraction)  
255 with varying daily or seasonal environmental conditions (e.g. temperature) would be beneficial and may  
256 explain the diverse set of receptors observed in sponges. Experimental characterization of these binding  
257 domains is necessary and may even show that a combination of these hypotheses explains the diversification  
258 of mGABARs in Porifera.

259  
260 The apparent absence of true mGABARs in calcareous sponges (the genome of *S. ciliatum* and transcrip-  
261 tome of *L. complicata*) conflicts with a previous study that identified key proteins in the GABA pathway  
262 by immunostaining [Ramoino et al., 2010]. The best mGABARs BLAST hits found in the two calcisponges  
263 display a conserved ligand binding domain but the seven-transmembrane domain has been swapped with  
264 a tyrosine kinase domain (Figure 5). Structural similarity of the conserved N-terminal domain may result  
265 in a false-positive signal in studies using immunostaining with standard antibodies [Ramoino et al., 2010].  
266 On the other hand, compared to ctenophores, which apparently lack ABAT, this enzyme was found in both  
267 of the calcareous sponges analyzed. Thus it would be surprising if these sponges had no capacity to create  
268 or respond to GABA. Since true vertebrate-like mGABARs are found in all other sponge classes, and our  
269 study could only examine two calcareous sponges, it could be that mGABAR presence is variable in this  
270 class. The genome of *S. ciliatum* contains 40 proteins annotated as mGluRs [Fortunato et al., 2014], so a  
271 third possibility is that even in the absence of true mGABARs, some of these proteins may have evolved  
272 affinity for GABA and mediate its signaling in calcareous sponges.

273  
274 Although a putative iGluR was identified in the transcriptome of the demosponge *Ircinia fasciculata*,  
275 this sequence was only a fragment, so the glutamate affinity and domain structure could not be determined.  
276 As with the mGABARs, the domain structure is different between the sponge classes. Otherwise, it appears  
277 that only calcareous sponges and homoscleromorphs have NMDA/AMPA-like iGluRs. The presence of these  
278 proteins in plants and other single-celled eukaryotes suggests that at least iGluRs were present in the com-  
279 mon ancestor of all eukaryotes, and their absence in demosponges is likely the product of secondary losses.  
280 In the context of contractions of *T. wilhelma*, the abundance of mGluRs and mGABARs could plausibly  
281 work in antagonistic ways via the action of different G-proteins making ionotropic channels not necessary  
282 for the modulation of this behavior.

## 284 Variation in neurotransmitter metabolism

285 Many of the oxidative enzymes in the monoamine pathway require molecular oxygen, suggesting an im-  
286 portant role of this molecule both the synthesis of the neurotransmitters (with PAH, TH, and DBH) and  
287 their inactivation (with MAO). Two catabolic pathways arise from tyrosine (Figure 3) and require oxygen  
288 at nearly all steps. It is unclear why intermediate products of one of these two, the catecholamine pathway,  
289 became neurotransmitters and the other did not, particularly as hydroxyphenylpyruvate pathway is univer-  
290 sally found in animals and catabolic intermediates are likely to be universal.

291  
292 MAO was found in most animal groups, but we were unable to find any in placozoans or ctenophores.  
293 The topology of the MAO phylogenetic tree suggests a secondary loss of this protein in these phyla (Sup-  
294 plemental Figure 9). Related genes (PAOX, polyamine oxidase) were found in placozoans with several  
295 placozoan-specific duplications, and again, potentially one of these may catalyze the oxidation of aromatic  
296 amines. The analysis of these proteins also uncovered a clade including sponges, cnidarians, and lancelets,  
297 though the function of these proteins cannot be predicted based on homology searches. *In vitro* charac-  
298 terization of these enzymes may reveal the function to provide evidence as to how these could have been  
299 important for metabolism in early animals, and was subsequently replaced or lost in most other metazoan  
300 lineages.

301  
302 Remarkably, the DBH group has independent expansions in three sponge classes as well as placozoans

303 and cnidarians (Supplemental Figure 7). No DBH homologs were identified in calcareous sponges or in  
304 ctenophores. A putative homolog of this group was found in the choanoflagellate *M. brevicollis* but not in  
305 any other non-metazoan. The alignment and the phylogenetic position of the *M. brevicollis* protein suggest  
306 that it may be a member of the copper-binding oxygenase superfamily, rather than a true homolog of DBH  
307 (see Supplemental Alignment).

308  
309 The presence of DBH-like and AADC-like enzymes in most animal groups suggests the possibility to  
310 make phenylethanolamines (like octopamine or noradrenaline) from tyrosine, and then subsequently inac-  
311 tivate them with MAO. All demosponges appear to lack AADC, and ctenophores appear to lack both of  
312 these enzymes calling into question a previous report of the detectability of monoamine neurotransmitters  
313 in ctenophores [Carlberg and Rosengren, 1985].  
314

## 315 Conserved properties of neurons

316 Neurons are defined by the presence of five key aspects: membrane potential, voltage-gated ion channels,  
317 secretory pathways, ligand-gated ion channels, and cell-cell junctions to form synapses. Voltage-gated chan-  
318 nels, secretory systems, and ligand-gated ion channels are thoroughly discussed above. Membrane potential  
319 is maintained in animal cells by sodium-potassium pumps (ATP-ases), which are a class of cation pumps  
320 exclusively found in animals [Stein, 1995, Sáez et al., 2009]. It is thought that such pumps are necessary  
321 because animals are the only multicellular group that lacks any kind of cell wall, thus careful control of  
322 ionic balance is necessary to resist osmotic stress [Stein, 1995]. For non-bilaterian animals, cell layers were  
323 in direct contact with water, so potentially all cells needed this protein to function normally. Therefore  
324 having neuron-like functionality is unlikely to rest upon the gain or loss of this gene. The last feature is  
325 the presence of cell-cell connections. Many proteins involved in synapse structure or neurotransmission are  
326 found in sponges, [Srivastava et al., 2010, Riesgo et al., 2014a, Moran et al., 2015, Leys, 2015] though it is not  
327 clear which genes are necessary for neural functioning, or may have evolved independently.

## 328 Neural evolution and losses

329 Based on recent phylogenies, both Porifera-sister and Ctenophora-sister evolutionary scenarios require either  
330 at least one loss of neurons or two independent gains (Figure 1) of this cell-type. The only scenario that  
331 allows for a single evolution of neurons and no losses is the “Coelenterata” hypothesis (reviewed in [Jékely  
332 et al., 2015]), which joins cnidarians and ctenophores in a clade. However, many molecular datasets [Dunn  
333 et al., 2008, Ryan et al., 2013, Whelan et al., 2015, Pisani et al., 2015] and morphological evidence [Harbison,  
334 1985] argue against this scenario (but also see [Philippe et al., 2009] and [Simion et al., 2017]). One other  
335 alternative is that placozoans have an unidentified neuron-like cell in a Porifera-sister context, which would  
336 therefore allow for a single origin of neural systems in animals and no losses.  
337

338 What do the two different scenarios mean for evolution of neuronal cells? Considering the basic properties  
339 of neurons related to electrical signaling or secretory pathways, it had been shown before that many of the  
340 genes involved are universally found in animals. A single origin and multiple losses implies that the genetic  
341 toolkit necessary for all of these functions was present in the same single-celled organism or the same cell  
342 type (an hypothetical proto-neuron) of the last common ancestor of crown-group Metazoa, and either that  
343 cell type was lost or its functions were split up.  
344

345 Sponges and ctenophores both appear to have lost several gene families (Figure 6), though ctenophores  
346 nonetheless have neural cells. Thus, the losses of the GABA or monoamine pathways are not critical for the  
347 functioning of neural cell types overall. However, voltage-gated potassium and sodium channels are thought  
348 to be essential for the propagation of electrical signals down axons and dendrites and have been found in  
349 all animal groups except sponges [Moran et al., 2015]. The NaV-channel tree shows a single origin of this  
350 protein family (Supplemental Figure 17), and presence of these channels in choanoflagellates suggests they  
351 were present in the common ancestor of all animals; the apparent absence in sponges therefore is probably a  
352 secondary loss. By comparison, ctenophores have a mostly-unique expansion of Kv-channels relative to the  
353 rest of metazoans [Li et al., 2015] and a duplication in NaV channels. Together with the loss of this protein

354 family in sponges, the gene content argues for a combination of both multiple, independent gains and a loss  
355 of neural-type cells and their associated functions across animals.

356  
357 Properties of the earliest metazoans are unknown, including life cycle or number of cell types, but it  
358 seems parsimonious to conceive that the first obligate multicellular animals did not have anything close to a  
359 sophisticated nervous system [Wray et al., 2015]. Yet, the genomic evidence shows that these animals could  
360 respond to environmental or paracrine signals, regulate the cell internal ion concentrations and respond to  
361 changes in their concentrations, and secrete small molecules that could serve as effectors in unconnected (but  
362 proximal) cells. Thus, the earliest animals likely had the capacity to develop nerve cells using the genetic  
363 toolkit they possessed, though the number of times this occurred is unclear. This capacity appears to have  
364 been lost in sponges with the loss of voltage-gated channels. As we were unable to find putative genes  
365 to mediate action potentials in glass sponges, either all of the four transcriptomes were incomplete or the  
366 unique action potentials of glass sponges may represent a third case of the evolution of neural-like functions  
367 in Metazoa.

## 369 **Methods**

### 370 **Sequence data**

371 Project overview can be found at [spongebase.net](http://spongebase.net). Reference data from the demosponge *Tethya wilhelma*  
372 are available at: [https://bitbucket.org/molpalmuc/tethya\\_wilhelma-genome](https://bitbucket.org/molpalmuc/tethya_wilhelma-genome)

373  
374 Raw genomic reads for *T. wilhelma* are available on NCBI SRA under accession numbers SRR2163223  
375 (genomic reads), SRR2296844 (mate pairs), SRR5369934 (DNA Molecule), and SRR4255675 (RNAseq).

### 377 **Genome assembly**

#### 378 **Processing and assembly**

379 We generated 25Gb of 100bp paired-end Illumina reads of genomic DNA and 35Gb of 125bp Illumina gel-free  
380 mate-pair reads. Contigs were assembled with SOAPdenovo2 [Luo et al., 2012] using a kmer of 83bp. We  
381 also generated 436Mb of Molecule synthetic long reads. Because both haplotypes are represented in the  
382 Molecule reads, we merged the Molecule reads using HaploMerger [Huang et al., 2012]. Contigs and merged  
383 Molecule reads were then scaffolded using the gel-free mate-pairs with SSPACE [Boetzer et al., 2011] and  
384 BESST [Sahlin et al., 2014]. The first draft assembly had 7,947 contigs, totaling 145 megabases.

#### 386 **Removal of low-coverage contigs**

387 To examine the completeness of the genome, we generated a plot of kmer coverage against GC percentage for  
388 the contigs (Supplemental Figure 1) using custom Python scripts (available at <http://github.org/wrf/lavaLampPlot>).  
389 This revealed 1,040 contigs with a coverage of zero that were carried over from the Molecule reads and were  
390 not assembled (Supplemental Figure 2), accounting for 6 megabases. As these reads likely derived from  
391 bacterial contamination in the aquarium water, these contigs were removed, leaving 6,907 contigs totalling  
392 138 megabases.

#### 394 **Separation of bacterial contigs**

395 Additionally, the plot revealed many contigs with lower coverage (20x-90x) and high GC content (50-75%)  
396 suggesting the presence of bacteria (Supplemental Figure 3). Because many of these contigs were shorter  
397 than 10kb, separation of the bacterial contigs was done through several steps. We found 4,858 contigs with  
398 mapped RNAseq reads and GC content under 50%, as expected of metazoans. These contigs accounted for

399 88% of the sponge assembly, or 121 megabases. For the 2,014 contigs with no mapped RNAseq, we used  
400 blastn to search the contigs against the *A. queenslandica* scaffolds and all complete bacterial genomes from  
401 Genbank (5,242 sequences). Based on subtraction of bitscores, 62 contigs were identified as sponge and 565  
402 were identified as bacterial. For the remaining 1,387 contigs, most of which were under 10kb, we repeated  
403 the search with tblastx against *A. queenslandica* scaffolds and the genomes of *Sinorhizobium medicae* and  
404 *Roseobacter litoralis*, which were the most similar complete genomes to the two bacterial 16S rRNAs identi-  
405 fied in the contigs. After all sorting, 798 putative bacterial contigs accounted for 12.7 megabases and were  
406 separated to bring the total to 6,109 sponge contigs. Contigs for the two bacteria were binned by tetranu-  
407 cleotide frequency using MetaWatt [Strous et al., 2012] (Supplemental Figure 4).

## 409 Genome coverage and completeness

410 Coverage was estimated two ways: kmer frequency and read mapping. Kmers of 31bp were counted using  
411 the Jellyfish kmer counter [Marçais and Kingsford, 2011] and analyzed using custom Python and R scripts  
412 (“fastqDumps2histo.py” and “jellyfish\_gc\_coverage\_blob\_plot\_v2.R”, available at [http://github.org/wrf/](http://github.org/wrf/lavaLampPlot)  
413 [lavaLampPlot](http://github.org/wrf/lavaLampPlot)). As expected, the kmer distribution showed two peaks, one for kmers at heterozygous  
414 positions and one for homozygous positions, whereupon the coverage peak was at 131-fold coverage for ho-  
415 mozygous positions. Because of sequencing errors, this method often underestimates coverage, and so to  
416 confirm this estimate we then mapped all reads to the genome using Bowtie2 [Langmead and Salzberg, 2012].  
417 The sum of mapped reads divided by the total length provided an estimated coverage of 159-fold physical  
418 coverage.

419  
420 Of the original reads, 185 million (86.5%) mapped back to the assembled sponge contigs. Completeness  
421 for gene content was assessed with BUSCO [Simão et al., 2015], whereupon we found 728 (86%) complete  
422 genes and 42 (4.9%) predicted-incomplete genes. Overall, these data suggest that the genome assembly is  
423 adequate for downstream analyses.

## 425 Genome annotation

### 426 Transcriptome versions

427 The transcriptome for *T. wilhelma* was assembled *de novo* using Trinity (release r20140717) [Grabherr et al.,  
428 2011, Haas et al., 2013]. Default parameters were used, except for strand specific assembly, *in silico* read  
429 normalization, and trimming (-SS\_lib\_type RF -normalize\_reads -trimmomatic). This produced 127,012  
430 transcripts with an average length of 913bp. Assembled transcripts were mapped to the genomic assembly  
431 using GMAP [Wu and Watanabe, 2005] to produce a GFF file of the transcript mapping. Of these, 114,744  
432 transcripts were mapped 166,847 times, allowing for multiple mappings.

433  
434 For the genome-guided transcriptome, strand-specific RNAseq reads were mapped against the genome  
435 build using Tophat2 v2.0.13 [Kim et al., 2013] using strand-specific mapping (option -library-type fr-  
436 firststrand) and otherwise default parameters. Mapped reads were then joined into transcripts using StringTie  
437 v1.0.2 [Pertea et al., 2015] with default parameters.

438  
439 Additionally, *ab initio* gene models were predicted using AUGUSTUS [Stanke et al., 2008]. AUGUSTUS  
440 was trained on the webAugustus server [Hoff and Stanke, 2013] using the highest expression transcripts for  
441 each Trinity component and the assembled contigs. This identified 27,551 putative genes. The majority of  
442 these overlapped partially or completely with a predicted gene based on the Trinity mapping or Stringtie  
443 genes. However, 3,866 genes (4,321 transcripts) had no overlap with any predicted exon from either the  
444 Trinity or StringTie set, and were kept for the final set. Considering the possibility that some of these may  
445 be pseudogenes, we aligned these proteins to the SwissProt database with BLASTP [Camacho et al., 2009].  
446 Of these, only 759 had reliable hits (E-value < 10<sup>-5</sup>) to 688 proteins. The annotated functions were diverse,  
447 including proteins similar to many receptors and large structural proteins such as fibrillin (potentially any  
448 protein with EGF repeats), dynein heavy chain, and titin; because very large proteins may be split across



449 multiple contigs, the predicted genes may be only fragments of the full gene. Only 42 of the hits were against  
450 transposable elements.

### 451 **Filtering of the final gene set**

452 Because assembly of transcripts for both StringTie and Trinity relies on overlaps in the genome or RNAseq  
453 reads, genes that overlap in the untranslated regions (UTRs) can sometimes be erroneously fused. For  
454 StringTie, we developed a custom Python script to separate non-overlapping transcripts belonging to the  
455 same “gene” (`stringtiesplitgenes.py`, available at <https://bitbucket.org/wrf/sequences/>). Tandem du-  
456 plications can lead to RNAseq reads bridging the two tandem copies and result in both copies being called  
457 the same gene. The original StringTie set contained 46,572 transcripts for 32,112 genes, while the corrected  
458 set contained 33,200 genes and identified 1,088 new non overlapping genes.

459  
460 Positional errors in the genome or allelic variations may result in some RNAseq reads not mapping  
461 to the genome, so some genes are fragmented in the genome-guided transcriptome but not the *de novo*  
462 assembly. Making use of the protein predictions from TransDecoder, we compared the predicted pro-  
463 teins between the two transcriptomes using a custom Python script (`transdecodersplitgenes.py`, available  
464 at <https://bitbucket.org/wrf/sequences/>). This identified 406 StringTie transcripts that were better  
465 modeled by Trinity transcripts.  
466

### 467 **Functional gene annotation**

468 Many genes of functional importance were examined manually, and the best transcript from StringTie, Trin-  
469 ity, or AUGUSTUS was retained for the final gene set. In the GFF and fasta versions of the transcriptomes,  
470 names of protein functions were assigned several ways. Target genes that were manually curated and edited,  
471 such as those used in all trees, are named by the generic function or the annotated function of the closest  
472 human protein. For instance, the dopamine beta-hydroxylase (DBH) homolog in *T. wilhelma* was manu-  
473 ally corrected, and the position in a phylogenetic tree demonstrated that demosponges diverged before the  
474 duplication which created DBH and the two DBH-like proteins in humans, thus the *T. wilhelma* protein  
475 is annotated as DBH-like. Secondly, automated ortholog finding pipelines (HaMStR [Ebersberger et al.,  
476 2009]) used for phylogeny [Cannon et al., 2016] have identified homologs in *T. wilhelma*, which have been  
477 manually checked based on positions in the phylogenetic trees. Thirdly, single-direction BLAST results were  
478 kept as annotations provided that the BLAST hit had a bitscore over 1000, or a bitscore over 300 and the  
479 *T. wilhelma* protein covered at least 75% of the best hit against the human protein dataset from SwissProt.  
480 The bitscore and length cutoffs were applied to reduce the number of annotations based on a single domain.  
481

### 482 **Analysis of splice variation**

483 Using the transcriptome from StringTie, splice variation was assessed using a custom Python script (`splice-`  
484 `variantstats.py`, available at <https://bitbucket.org/wrf/sequences/>). In this script, several ambiguous  
485 definitions were clarified to define the different splice types. Firstly, single exon genes with no variants are  
486 distinguished from single exon genes with variations, that is, a gene with two exons can have a variant with  
487 one exon. For loci with only two transcripts, the canonical or main transcript is defined as the one with  
488 the higher expression level, as measured by the higher FPKM value reported from StringTie. For loci with  
489 three or more transcripts, main or canonical exons are those included in at least two transcripts. A cassette  
490 exon must occur in less than 50% of the transcripts for a locus, otherwise such case is defined as a skipped  
491 exon. A retained intron is any portion that exactly spans two other exons; for highly expressed transcripts  
492 this may include erroneously retained introns due to intermediates in splicing. A summary of the splicing  
493 types is displayed in Supplemental Table 2.  
494

495 Intron retention was recently reported to be a common mode of alternative splicing in *A. queens-*  
496 *landica* [Fernandez-Valverde et al., 2015]. We found 3,295 transcripts with 3,565 retained intron events  
497 (Supplemental Table 2). We then analyzed the length of the retained introns and found the phase of the

498 retained piece to be randomly distributed (unlike cassette exons, Supplemental Table 3), suggesting that  
499 many of the retained introns result from incomplete splicing rather than functional retention.

500

## 501 **Microsynteny across sponges**

502 Putative synteny blocks were identified using a custom Python script (microsynteny.py, available at <https://bitbucket.org/wrf/sequences/>). Briefly, the script combines the gene positions on scaffolds for both  
503 the query and the reference with BLASTX hits for the query against the reference. If a minimum of three  
504 genes in a row on a query scaffold match to different genes on the same reference scaffold, the group is  
505 kept. By default, this mandated a gap of no more than five genes before discarding the block, and that the  
506 next gene must occur within 30kb. This method was designed to work for highly fragmented genomes with  
507 thousands of scaffolds, so the order and direction of the corresponding genes on the reference scaffold do not  
508 need to match those of the query scaffold.

509

510 StringTie transcripts for *T. wilhelma* were aligned against the *A. queenslandica* v2.0 protein set with  
511 BLASTX [Camacho et al., 2009], and positions were taken from the accompanying *A. queenslandica* v2.0  
512 GTF. The same procedure was attempted against the *S. ciliatum* gene models, though essentially no syn-  
513 tenic blocks were detected, indicating either substantial differences in gene content or gene order between  
514 demosponges and calcareous sponges.

515

## 517 **Collection of reference data**

518 Proteins for *Oikopleura dioica* [Denoëud et al., 2010] were downloaded from Genoscope. Gene models  
519 for *Ciona intestinalis* [Dehal et al., 2002], *Branchiostoma floridae* [Putnam et al., 2008], *Trichoplax ad-*  
520 *herens* [Srivastava et al., 2008], *Capitella teleta*, *Lottia gigantea*, *Helobdella robusta* [Simakov et al., 2013],  
521 *Saccoglossus kowalevskii* [Simakov et al., 2015], and *Monosiga brevicollis* [King et al., 2008] were downloaded  
522 from the JGI genome portal. Gene models for *Sphaeroforma arctica*, *Capsaspora owczarzewski* [Suga et al.,  
523 2013] and *Salpingoeca rosetta* [Fairclough et al., 2013] were downloaded from the Broad Institute.

524

525 We used genomic data of the cnidarians *Nematostella vectensis* [Moran et al., 2014], *Exaiptasia pall-*  
526 *ida* [Baumgarten et al., 2015], and *Hydra magnipapillata* as well as transcriptomes from 33 other cnidari-  
527 ans [Bhattacharya et al., 2016, Zapata et al., 2015, Pralong et al., 2015, Brinkman et al., 2015, Ponce et al.,  
528 2016], mostly corals.

529

530 For demosponges, we used the genome of *Amphimedon queenslandica* [Srivastava et al., 2010, Fernandez-  
531 Valverde et al., 2015] and transcriptomic data from: *Mycale phyllophila* [Qiu et al., 2015], *Petrosia fici-*  
532 *formis* [Riesgo et al., 2014a], *Crambe crambe* [Versluis et al., 2015], *Cliona varians* [Riesgo et al., 2014b], *Hal-*  
533 *isarca dujardini* [Borisenko et al., 2016], *Crella elegans* [Pérez-Porro et al., 2013], *Stylissa carteri*, *Xestospon-*  
534 *gia testudinaria* [Ryu et al., 2016], *Scopalina* sp., and *Tedania anhelens*. We used data from the genome of the  
535 calcareous sponge *Sycon ciliatum* [Fortunato et al., 2014] and the transcriptome of *Leucosolenia complicata*.  
536 For hexactinellids (glass sponges), we used transcriptome data from *Aphrocallistes vastus* [Ludeman et al.,  
537 2014], *Hyalonema populiferum*, *Rosella fibulata*, and *Sympagella nux* [Whelan et al., 2015]. For homosclero-  
538 morphs, we used two transcriptomes from *Oscarella carmela* and *Corticium candelabrum* [Ludeman et al.,  
539 2014].

540

541 We used data from the two published draft genomes of ctenophores [Ryan et al., 2013, Moroz et al., 2014],  
542 as well as transcriptome data from 11 additional ctenophores: *Bathocyroe fosteri*, *Bathocyroe chuni*, *Beroe*  
543 *abyssicola*, *Bolinopsis infundibulum*, *Charistephane fugiens*, *Dryodora glandiformis*, *Euplokamis dunlapae*,  
544 *Hormiphora californensis*, *Lamnea lactea*, *Thalassocalyce inconstans*, and *Velamen parallelum*.

545

546 We used data from the unpublished draft genome of a novel placozoan species, designated H13.

547

## 548 Gene trees

549 For protein trees, candidate proteins were identified by reciprocal BLAST alignment using blastp or tblastn.  
550 All BLAST searches were done using the NCBI BLAST 2.2.29+ package [Camacho et al., 2009]. Because  
551 most functions were described for human, mouse, or fruit fly proteins, these served as the queries for all  
552 datasets. Candidate homologs were kept for analysis if they reciprocally aligned by blastp to a query pro-  
553 tein, usually human. Alignments for protein sequences were created using MAFFT v7.029b, with L-INS-i  
554 parameters for accurate alignments [Kato and Standley, 2013]. Phylogenetic trees were generated using ei-  
555 ther FastTree [Price et al., 2010] with default parameters or RAxML-HPC-PTHREADS v8.1.3 [Stamatakis,  
556 2014], using the PROTGAMMALG model for proteins and 100 bootstrap replicates with the “rapid boot-  
557 strap” (-f a) algorithm and a random seed of 1234.

## 559 Domain annotation

560 Domains for individual protein trees were annotated with “hmmScan” v3.1b1 from the HHMER pack-  
561 age [Eddy, 2011] using the PFAM-A database v27.0 [Finn et al., 2016] as queries. Signal peptides were pre-  
562 dicted using the stand-alone version of SignalP v4.1 [Petersen et al., 2011]. Domain structures were visualized  
563 using a custom Python script, “pfampipeline.py”, available at <https://github.com/wrf/genomeGTFtools>.

## 565 Acknowledgments

566 W.R.F would like to thank K. Achim, M. Nickel and J. Musser for helpful discussions. This work was  
567 supported by a LMUexcellent grant (Project MODELSPONGE) to G.W. as part of the German Excellence  
568 Initiative, and NIH grant NIGMS-5-R01-GM087198 to S.H.D.H. The authors declare no competing interests.

## 569 References

### 570 References

- 571 [Alberstein et al., 2015] Alberstein, R., Grey, R., Zimmet, A., Simmons, D. K., and Mayer, M. L.  
572 (2015). Glycine activated ion channel subunits encoded by ctenophore glutamate receptor genes.  
573 *Proceedings of the National Academy of Sciences*, 112(44):E6048–E6057.
- 574 [Árnadóttir and Chalfie, 2010] Árnadóttir, J. and Chalfie, M. (2010). Eukaryotic Mechanosensitive  
575 Channels. *Annual Review of Biophysics*, 39(1):111–137.
- 576 [Baumgarten et al., 2015] Baumgarten, S., Simakov, O., Esherrick, L. Y., Liew, Y. J., Lehnert, E. M.,  
577 Michell, C. T., Li, Y., Hambleton, E. a., Guse, A., Oates, M. E., Gough, J., Weis, V. M., Aranda,  
578 M., Pringle, J. R., and Voolstra, C. R. (2015). The genome of *Aiptasia*, a sea anemone model for  
579 coral symbiosis. *Proceedings of the National Academy of Sciences*, page 201513318.
- 580 [Bhattacharya et al., 2016] Bhattacharya, D., Agrawal, S., Aranda, M., Baumgarten, S., Belcaid, M.,  
581 Drake, J. L., Erwin, D., Foret, S., Gates, R. D., Gruber, D. F., Kamel, B., Lesser, M. P., Levy,  
582 O., Liew, Y. J., MacManes, M., Mass, T., Medina, M., Mehr, S., Meyer, E., Price, D. C., Putnam,  
583 H. M., Qiu, H., Shinzato, C., Shoguchi, E., Stokes, A. J., Tambutté, S., Tchernov, D., Voolstra,  
584 C. R., Wagner, N., Walker, C. W., Weber, A. P., Weis, V., Zelzion, E., Zoccola, D., and Falkowski,  
585 P. G. (2016). Comparative genomics explains the evolutionary success of reef-forming corals. *eLife*,  
586 5:1–26.
- 587 [Boetzer et al., 2011] Boetzer, M., Henkel, C. V., Jansen, H. J., Butler, D., and Pirovano, W. (2011).  
588 Scaffolding pre-assembled contigs using SSPACE. *Bioinformatics*, 27(4):578–579.
- 589 [Borisenko et al., 2016] Borisenko, I., Adamski, M., Ereskovsky, A., and Adamska, M. (2016). Sur-  
590 prisingly rich repertoire of Wnt genes in the demosponge *Halisarca dujardini*. *BMC evolutionary*  
591 *biology*, 16(1):123.

- 592 [Brinkman et al., 2015] Brinkman, D. L., Jia, X., Potriquet, J., Kumar, D., Dash, D., Kvaskoff, D.,  
593 and Mulvenna, J. (2015). Transcriptome and venom proteome of the box jellyfish *Chironex fleckeri*.  
594 *BMC Genomics*, 16(1):407.
- 595 [Camacho et al., 2009] Camacho, C., Coulouris, G., Avagyan, V., Ma, N., Papadopoulos, J., Bealer,  
596 K., and Madden, T. L. (2009). BLAST+: architecture and applications. *BMC bioinformatics*,  
597 10:421.
- 598 [Cannon et al., 2016] Cannon, J. T., Vellutini, B. C., Smith, J., Ronquist, F., Jondelius, U., and  
599 Hejnol, A. (2016). Xenacoelomorpha is the sister group to Nephrozoa. *Nature*, 530(7588):89–93.
- 600 [Cao et al., 2010] Cao, J., Shi, F., Liu, X., Huang, G., and Zhou, M. (2010). Phylogenetic analysis  
601 and evolution of aromatic amino acid hydroxylase. *FEBS Letters*, 584(23):4775–4782.
- 602 [Carlberg and Rosengren, 1985] Carlberg, M. and Rosengren, E. (1985). Biochemical basis for adren-  
603 ergic neurotransmission in coelenterates. *Journal of Comparative Physiology B*, 155(2):251–255.
- 604 [Coste et al., 2012] Coste, B., Xiao, B., Santos, J. S., Syeda, R., Grandl, J., Spencer, K. S., Kim, S. E.,  
605 Schmidt, M., Mathur, J., Dubin, A. E., Montal, M., and Patapoutian, A. (2012). Piezo proteins are  
606 pore-forming subunits of mechanically activated channels. *Nature*, 483(7388):176–181.
- 607 [Dehal et al., 2002] Dehal, P., Satou, Y., Campbell, R. K., Chapman, J., Degnan, B., De Tomaso, A.,  
608 Davidson, B., Di Gregorio, A., Gelpke, M., Goodstein, D. M., Harafuji, N., Hastings, K. E. M., Ho,  
609 I., Hotta, K., Huang, W., Kawashima, T., Lemaire, P., Martinez, D., Meinertzhagen, I. a., Necula,  
610 S., Nonaka, M., Putnam, N., Rash, S., Saiga, H., Satake, M., Terry, A., Yamada, L., Wang, H.-G.,  
611 Awazu, S., Azumi, K., Boore, J., Branno, M., Chin-Bow, S., DeSantis, R., Doyle, S., Francino, P.,  
612 Keys, D. N., Haga, S., Hayashi, H., Hino, K., Imai, K. S., Inaba, K., Kano, S., Kobayashi, K.,  
613 Kobayashi, M., Lee, B.-I., Makabe, K. W., Manohar, C., Matassi, G., Medina, M., Mochizuki, Y.,  
614 Mount, S., Morishita, T., Miura, S., Nakayama, A., Nishizaka, S., Nomoto, H., Ohta, F., Oishi, K.,  
615 Rigoutsos, I., Sano, M., Sasaki, A., Sasakura, Y., Shoguchi, E., Shin-i, T., Spagnuolo, A., Stainier,  
616 D., Suzuki, M. M., Tassy, O., Takatori, N., Tokuoka, M., Yagi, K., Yoshizaki, F., Wada, S., Zhang,  
617 C., Hyatt, P. D., Larimer, F., Detter, C., Doggett, N., Glavina, T., Hawkins, T., Richardson,  
618 P., Lucas, S., Kohara, Y., Levine, M., Satoh, N., and Rokhsar, D. S. (2002). The draft genome  
619 of *Ciona intestinalis*: insights into chordate and vertebrate origins. *Science (New York, N.Y.)*,  
620 298(5601):2157–2167.
- 621 [Denoeud et al., 2010] Denoeud, F., Henriot, S., Mungpakdee, S., Aury, J.-M., Da Silva, C.,  
622 Brinkmann, H., Mikhaleva, J., Olsen, L. C., Jubin, C., Canestro, C., Bouquet, J.-M., Danks, G.,  
623 Poulain, J., Campsteijn, C., Adamski, M., Cross, I., Yadatie, F., Muffato, M., Louis, A., Butcher,  
624 S., Tsagkogeorga, G., Konrad, A., Singh, S., Jensen, M. F., Cong, E. H., Eikeseth-Otteraa, H.,  
625 Noel, B., Anthouard, V., Porcel, B. M., Kachouri-Lafond, R., Nishino, A., Ugolini, M., Chourrout,  
626 P., Nishida, H., Aasland, R., Huzurbazar, S., Westhof, E., Delsuc, F., Lehrach, H., Reinhardt, R.,  
627 Weissenbach, J., Roy, S. W., Artiguenave, F., Postlethwait, J. H., Manak, J. R., Thompson, E. M.,  
628 Jaillon, O., Du Pasquier, L., Boudinot, P., Liberles, D. a., Volff, J.-N., Philippe, H., Lenhard, B.,  
629 Crollius, H. R., Wincker, P., and Chourrout, D. (2010). Plasticity of Animal Genome Architecture  
630 Unmasked by Rapid Evolution of a Pelagic Tunicate. *Science*, 1381(2010).
- 631 [Dunn et al., 2008] Dunn, C. W., Hejnol, A., Matus, D. Q., Pang, K., Browne, W. E., Smith, S. a.,  
632 Seaver, E., Rouse, G. W., Obst, M., Edgecombe, G. D., Sørensen, M. V., Haddock, S. H. D.,  
633 Schmidt-Rhaesa, A., Okusu, A., Kristensen, R. M., Wheeler, W. C., Martindale, M. Q., and Giribet,  
634 G. (2008). Broad phylogenomic sampling improves resolution of the animal tree of life. *Nature*,  
635 452(7188):745–9.
- 636 [Dunn et al., 2015] Dunn, C. W., Leys, S. P., and Haddock, S. H. D. (2015). The hidden biology of  
637 sponges and ctenophores. *Trends in Ecology & Evolution*, pages 1–10.
- 638 [Ebersberger et al., 2009] Ebersberger, I., Strauss, S., and von Haeseler, A. (2009). HaMStR: profile  
639 hidden markov model based search for orthologs in ESTs. *BMC evolutionary biology*, 9:157.
- 640 [Eddy, 2011] Eddy, S. R. (2011). Accelerated profile HMM searches. *PLoS Computational Biology*,  
641 7(10).

- 642 [Elliott and Leys, 2007] Elliott, G. R. D. and Leys, S. P. (2007). Coordinated contractions effectively  
643 expel water from the aquiferous system of a freshwater sponge. *Journal of Experimental Biology*,  
644 210(21):3736–3748.
- 645 [Elliott and Leys, 2010] Elliott, G. R. D. and Leys, S. P. (2010). Evidence for glutamate, GABA and  
646 NO in coordinating behaviour in the sponge, *Ephydatia muelleri* (Demospongiae, Spongillidae). *The*  
647 *Journal of experimental biology*, 213:2310–2321.
- 648 [Ellwanger et al., 2007] Ellwanger, K., Eich, A., and Nickel, M. (2007). GABA and glutamate specif-  
649 ically induce contractions in the sponge *Tethya wilhelma*. *Journal of Comparative Physiology A:*  
650 *Neuroethology, Sensory, Neural, and Behavioral Physiology*, 193(1):1–11.
- 651 [Ellwanger and Nickel, 2006] Ellwanger, K. and Nickel, M. (2006). Neuroactive substances specifically  
652 modulate rhythmic body contractions in the nerveless metazoan *Tethya wilhelma* (Demospongiae,  
653 Porifera). *Frontiers in zoology*, 3:7.
- 654 [Fairclough et al., 2013] Fairclough, S. R., Chen, Z., Kramer, E., Zeng, Q., Young, S., Robertson,  
655 H. M., Begovic, E., Richter, D. J., Russ, C., Westbrook, M. J., Manning, G., Lang, B. F., Haas,  
656 B., Nusbaum, C., and King, N. (2013). Premetazoan genome evolution and the regulation of cell  
657 differentiation in the choanoflagellate *Salpingoeca rosetta*. *Genome biology*, 14(2):R15.
- 658 [Fernandez-Valverde et al., 2015] Fernandez-Valverde, S. L., Calcino, A. D., and Degnan, B. M. (2015).  
659 Deep developmental transcriptome sequencing uncovers numerous new genes and enhances gene  
660 annotation in the sponge *Amphimedon queenslandica*. *BMC Genomics*, 16(1):1–11.
- 661 [Finn et al., 2016] Finn, R. D., Coghill, P., Eberhardt, R. Y., Eddy, S. R., Mistry, J., Mitchell, A. L.,  
662 Potter, S. C., Punta, M., Qureshi, M., Sangrador-Vegas, A., Salazar, G. A., Tate, J., and Bateman,  
663 A. (2016). The Pfam protein families database: towards a more sustainable future. *Nucleic Acids*  
664 *Research*, 44(D1):D279–D285.
- 665 [Fortunato et al., 2014] Fortunato, S. a. V., Adamski, M., Ramos, O. M., Leininger, S., Liu, J., Ferrier,  
666 D. E. K., and Adamska, M. (2014). Calcisponges have a ParaHox gene and dynamic expression of  
667 dispersed NK homeobox genes. *Nature*, 514(7524):620–623.
- 668 [Ge et al., 2015] Ge, J., Li, W., Zhao, Q., Li, N., Chen, M., Zhi, P., Li, R., Gao, N., Xiao, B., and Yang,  
669 M. (2015). Architecture of the mammalian mechanosensitive Piezo1 channel. *Nature*, 527(5):64–69.
- 670 [Geng et al., 2013] Geng, Y., Bush, M., Mosyak, L., Wang, F., and Fan, Q. R. (2013). Structural  
671 mechanism of ligand activation in human GABA(B) receptor. *Nature*, 504(7479):254–9.
- 672 [Grabherr et al., 2011] Grabherr, M. G., Haas, B. J., Yassour, M., Levin, J. Z., Thompson, D. a.,  
673 Amit, I., Adiconis, X., Fan, L., Raychowdhury, R., Zeng, Q., Chen, Z., Mauceli, E., Hacohen, N.,  
674 Gnirke, A., Rhind, N., di Palma, F., Birren, B. W., Nusbaum, C., Lindblad-Toh, K., Friedman, N.,  
675 and Regev, A. (2011). Full-length transcriptome assembly from RNA-Seq data without a reference  
676 genome. *Nature biotechnology*, 29(7):644–52.
- 677 [Grell and Benwitz, 1974] Grell, K. G. and Benwitz, G. (1974). Spezifische Verbindungsstrukturen der  
678 Faserzellen von *Trichoplax adhaerens* F.E. Schulze. *Z. Naturforsch.*, 29c:790.
- 679 [Gur Barzilai et al., 2012] Gur Barzilai, M., Reitzel, A. M., Kraus, J. E. M., Gordon, D., Technau, U.,  
680 Gurevitz, M., and Moran, Y. (2012). Convergent Evolution of Sodium Ion Selectivity in Metazoan  
681 Neuronal Signaling. *Cell Reports*, 2(2):242–248.
- 682 [Haas et al., 2013] Haas, B. J., Papanicolaou, A., Yassour, M., Grabherr, M., Blood, P. D., Bowden,  
683 J., Couger, M. B., Eccles, D., Li, B., Lieber, M., Macmanes, M. D., Ott, M., Orvis, J., Pochet,  
684 N., Strozzi, F., Weeks, N., Westerman, R., William, T., Dewey, C. N., Henschel, R., Leduc, R. D.,  
685 Friedman, N., and Regev, A. (2013). De novo transcript sequence reconstruction from RNA-seq  
686 using the Trinity platform for reference generation and analysis. *Nature protocols*, 8(8):1494–512.
- 687 [Harbison, 1985] Harbison, G. R. (1985). On the classification and evolution of the Ctenophora. In  
688 Conway Morris, S. C., George, J. D., Gibson, R., and Platt, H. M., editors, *The Origin and Rela-*  
689 *tionships of Lower Invertebrates*, pages 78–100. Clarendon Press, Oxford.
- 690 [Hoff and Stanke, 2013] Hoff, K. J. and Stanke, M. (2013). WebAUGUSTUS—a web service for training  
691 AUGUSTUS and predicting genes in eukaryotes. *Nucleic Acids Research*, 41(W1):W123–W128.



- 692 [Huang et al., 2012] Huang, S., Chen, Z., Huang, G., Yu, T., Yang, P., Li, J., Fu, Y., Yuan, S., Chen,  
693 S., and Xu, A. (2012). HaploMerger: Reconstructing allelic relationships for polymorphic diploid  
694 genome assemblies. *Genome Research*, 22(8):1581–1588.
- 695 [Jarvis et al., 2014] Jarvis, E. D., Mirarab, S., Aberer, A. J., Li, B., Houde, P., Li, C., Ho, S. Y. W.,  
696 Faircloth, B. C., Nabholz, B., Howard, J. T., Suh, A., Weber, C. C., da Fonseca, R. R., Li, J., Zhang,  
697 F., Li, H., Zhou, L., Narula, N., Liu, L., Ganapathy, G., Boussau, B., Bayzid, M. S., Zavidovych, V.,  
698 Subramanian, S., Gabaldon, T., Capella-Gutierrez, S., Huerta-Cepas, J., Rekepalli, B., Munch, K.,  
699 Schierup, M., Lindow, B., Warren, W. C., Ray, D., Green, R. E., Bruford, M. W., Zhan, X., Dixon,  
700 A., Li, S., Li, N., Huang, Y., Derryberry, E. P., Bertelsen, M. F., Sheldon, F. H., Brumfield, R. T.,  
701 Mello, C. V., Lovell, P. V., Wirthlin, M., Schneider, M. P. C., Prosdocimi, F., Samaniego, J. A.,  
702 Velazquez, A. M. V., Alfaro-Nunez, A., Campos, P. F., Petersen, B., Sicheritz-Ponten, T., Pas, A.,  
703 Bailey, T., Scofield, P., Bunce, M., Lambert, D. M., Zhou, Q., Perelman, P., Driskell, A. C., Shapiro,  
704 B., Xiong, Z., Zeng, Y., Liu, S., Li, Z., Liu, B., Wu, K., Xiao, J., Yinqi, X., Zheng, Q., Zhang, Y.,  
705 Yang, H., Wang, J., Smeds, L., Rheindt, F. E., Braun, M., Fjeldsa, J., Orlando, L., Barker, F. K.,  
706 Jonsson, K. A., Johnson, W., Koepfli, K.-P., O'Brien, S., Haussler, D., Ryder, O. A., Rahbek, C.,  
707 Willerslev, E., Graves, G. R., Glenn, T. C., McCormack, J., Burt, D., Ellegren, H., Alstrom, P.,  
708 Edwards, S. V., Stamatakis, A., Mindell, D. P., Cracraft, J., Braun, E. L., Warnow, T., Jun, W.,  
709 Gilbert, M. T. P., and Zhang, G. (2014). Whole-genome analyses resolve early branches in the tree  
710 of life of modern birds. *Science*, 346(6215):1320–1331.
- 711 [Jékely et al., 2015] Jékely, G., Paps, J., and Nielsen, C. (2015). The phylogenetic position of  
712 ctenophores and the origin(s) of nervous systems. *EvoDevo*, 6(1):1.
- 713 [Katoh and Standley, 2013] Katoh, K. and Standley, D. M. (2013). MAFFT multiple sequence align-  
714 ment software version 7: improvements in performance and usability. *Molecular biology and evolu-*  
715 *tion*, 30(4):772–80.
- 716 [Kim et al., 2013] Kim, D., Pertea, G., Trapnell, C., Pimentel, H., Kelley, R., and Salzberg, S. L.  
717 (2013). TopHat2: accurate alignment of transcriptomes in the presence of insertions, deletions and  
718 gene fusions. *Genome biology*, 14(4):R36.
- 719 [King et al., 2008] King, N., Westbrook, M. J., Young, S. L., Kuo, A., Abedin, M., Chapman, J.,  
720 Fairclough, S., Hellsten, U., Isogai, Y., Letunic, I., Marr, M., Pincus, D., Putnam, N., Rokas, A.,  
721 Wright, K. J., Zuzow, R., Dirks, W., Good, M., Goodstein, D., Lemons, D., Li, W., Lyons, J. B.,  
722 Morris, A., Nichols, S., Richter, D. J., Salamov, A., Sequencing, J. G. I., Bork, P., Lim, W. a.,  
723 Manning, G., Miller, W. T., McGinnis, W., Shapiro, H., Tjian, R., Grigoriev, I. V., and Rokhsar,  
724 D. (2008). The genome of the choanoflagellate *Monosiga brevicollis* and the origin of metazoans.  
725 *Nature*, 451(7180):783–8.
- 726 [Krishnan et al., 2014] Krishnan, A., Dnyansagar, R., Almén, M. S., Williams, M. J., Fredriksson,  
727 R., Manoj, N., and Schiöth, H. B. (2014). The GPCR repertoire in the demosponge *Amphimedon*  
728 *queenslandica*: insights into the GPCR system at the early divergence of animals. *BMC Evolutionary*  
729 *Biology*, 14(1):270.
- 730 [Krishnan and Schiöth, 2015] Krishnan, A. and Schiöth, H. B. (2015). The role of G protein-coupled  
731 receptors in the early evolution of neurotransmission and the nervous system. *The Journal of*  
732 *experimental biology*, 218(Pt 4):562–571.
- 733 [Langmead and Salzberg, 2012] Langmead, B. and Salzberg, S. L. (2012). Fast gapped-read alignment  
734 with Bowtie 2.
- 735 [Leys, 2015] Leys, S. P. (2015). Elements of a 'nervous system' in sponges. *The Journal of experimental*  
736 *biology*, 218(Pt 4):581–91.
- 737 [Leys et al., 1999] Leys, S. P., Mackie, G. O., and Meech, R. W. (1999). Impulse conduction in a  
738 sponge. *The Journal of experimental biology*, 202 (Pt 9)(June 1997):1139–1150.
- 739 [Leys et al., 2007] Leys, S. P., Mackie, G. O., and Reiswig, H. M. (2007). The Biology of Glass Sponges.  
740 *Advances in Marine Biology*, 52(06):1–145.
- 741 [Li et al., 2015] Li, X., Liu, H., Chu Luo, J., Rhodes, S. a., Trigg, L. M., van Rossum, D. B., Anishkin,  
742 A., Diatta, F. H., Sassic, J. K., Simmons, D. K., Kamel, B., Medina, M., Martindale, M. Q., and



- 743 Jegla, T. (2015). Major diversification of voltage-gated  $K^+$  channels occurred in ancestral  
744 parahoxozoans. *Proceedings of the National Academy of Sciences*, page 201422941.
- 745 [Liebeskind et al., 2011] Liebeskind, B. J., Hillis, D. M., and Zakon, H. H. (2011). Evolution of sodium  
746 channels predates the origin of nervous systems in animals. *Proceedings of the National Academy of  
747 Sciences of the United States of America*, 108(22):9154–9159.
- 748 [Ludeman et al., 2014] Ludeman, D. A., Farrar, N., Riesgo, A., Paps, J., and Leys, S. P. (2014).  
749 Evolutionary origins of sensation in metazoans: functional evidence for a new sensory organ in  
750 sponges. *BMC Evolutionary Biology*, 14(3):1–11.
- 751 [Luo et al., 2012] Luo, R., Liu, B., Xie, Y., Li, Z., Huang, W., Yuan, J., He, G., Chen, Y., Pan, Q.,  
752 Liu, Y., Tang, J., Wu, G., Zhang, H., Shi, Y., Liu, Y., Yu, C., Wang, B., Lu, Y., Han, C., Cheung,  
753 D. W., Yiu, S.-M., Peng, S., Xiaoqian, Z., Liu, G., Liao, X., Li, Y., Yang, H., Wang, J., Lam, T.-W.,  
754 and Wang, J. (2012). SOAPdenovo2: an empirically improved memory-efficient short-read de novo  
755 assembler. *GigaScience*, 1(1):18.
- 756 [Marçais and Kingsford, 2011] Marçais, G. and Kingsford, C. (2011). A fast, lock-free approach for  
757 efficient parallel counting of occurrences of k-mers. *Bioinformatics*, 27(6):764–770.
- 758 [Moran et al., 2015] Moran, Y., Barzilai, M. G., Liebeskind, B. J., and Zakon, H. H. (2015). Evolu-  
759 tion of voltage-gated ion channels at the emergence of Metazoa. *Journal of Experimental Biology*,  
760 218:515–525.
- 761 [Moran et al., 2014] Moran, Y., Fredman, D., Praher, D., Li, X. Z., Wee, L. M., Rentzsch, F., Zamore,  
762 P. D., Technau, U., and Seitz, H. (2014). Cnidarian microRNAs frequently regulate targets by  
763 cleavage. *Genome Research*, 24(4):651–663.
- 764 [Moroz, 2015] Moroz, L. L. (2015). Convergent evolution of neural systems in ctenophores. *Journal  
765 of Experimental Biology*, 218:598–611.
- 766 [Moroz et al., 2014] Moroz, L. L., Kocot, K. M., Citarella, M. R., Dosung, S., Norekian, T. P., Po-  
767 volotskaya, I. S., Grigorenko, A. P., Dailey, C., Berezikov, E., Buckley, K. M., Ptitsyn, A., Reshetov,  
768 D., Mukherjee, K., Moroz, T. P., Bobkova, Y., Yu, F., Kapitonov, V. V., Jurka, J., Bobkov, Y. V.,  
769 Swore, J. J., Girardo, D. O., Fodor, A., Gusev, F., Sanford, R., Bruders, R., Kittler, E., Mills, C. E.,  
770 Rast, J. P., Derelle, R., Solovyev, V. V., Kondrashov, F. a., Swalla, B. J., Sweedler, J. V., Rogaev,  
771 E. I., Halanych, K. M., and Kohn, A. B. (2014). The ctenophore genome and the evolutionary  
772 origins of neural systems. *Nature*, 17:1–123.
- 773 [Nickel, 2010] Nickel, M. (2010). Evolutionary emergence of synaptic nervous systems: what can we  
774 learn from the non-synaptic, nerveless Porifera? *Invertebrate Biology*, 129(1):1–16.
- 775 [Nosenko et al., 2013] Nosenko, T., Schreiber, F., Adamska, M., Adamski, M., Eitel, M., Hammel,  
776 J., Maldonado, M., Müller, W. E. G., Nickel, M., Schierwater, B., Vacelet, J., Wiens, M., and  
777 Wörheide, G. (2013). Deep metazoan phylogeny: when different genes tell different stories. *Molecular  
778 phylogenetics and evolution*, 67(1):223–33.
- 779 [Pérez-Porro et al., 2013] Pérez-Porro, a. R., Navarro-Gómez, D., Uriz, M. J., and Giribet, G. (2013).  
780 A NGS approach to the encrusting Mediterranean sponge *Crella elegans* (Porifera, Demospongiae,  
781 Poecilosclerida): transcriptome sequencing, characterization and overview of the gene expression  
782 along three life cycle stages. *Molecular ecology resources*, 454:494–509.
- 783 [Pertea et al., 2015] Pertea, M., Pertea, G. M., Antonescu, C. M., Chang, T.-C., Mendell, J. T., and  
784 Salzberg, S. L. (2015). StringTie enables improved reconstruction of a transcriptome from RNA-seq  
785 reads. *Nature Biotechnology*, 33(3).
- 786 [Petersen et al., 2011] Petersen, T. N., Brunak, S., von Heijne, G., and Nielsen, H. (2011). SignalP  
787 4.0: discriminating signal peptides from transmembrane regions. *Nature methods*, 8(10):785–6.
- 788 [Philippe et al., 2011] Philippe, H., Brinkmann, H., Lavrov, D. V., Littlewood, D. T. J., Manuel,  
789 M., Wörheide, G., and Baurain, D. (2011). Resolving difficult phylogenetic questions: why more  
790 sequences are not enough. *PLoS biology*, 9(3):e1000602.
- 791 [Philippe et al., 2009] Philippe, H., Derelle, R., Lopez, P., Pick, K., Borchiellini, C., Boury-Esnault,  
792 N., Vacelet, J., Renard, E., Houliston, E., Quéinnec, E., Da Silva, C., Wincker, P., Le Guyader, H.,

- 793 Leys, S., Jackson, D. J., Schreiber, F., Erpenbeck, D., Morgenstern, B., Wörheide, G., and Manuel,  
794 M. (2009). Phylogenomics revives traditional views on deep animal relationships. *Current biology :  
795 CB*, 19(8):706–12.
- 796 [Pick et al., 2010] Pick, K. S., Philippe, H., Schreiber, F., Erpenbeck, D., Jackson, D. J., Wrede, P.,  
797 Wiens, M., Alié, A., Morgenstern, B., Manuel, M., and Wörheide, G. (2010). Improved phylogenomic  
798 taxon sampling noticeably affects nonbilaterian relationships. *Molecular Biology and Evolution*,  
799 27(9):1983–1987.
- 800 [Pisani et al., 2015] Pisani, D., Pett, W., Dohrmann, M., Feuda, R., Rota-Stabelli, O., Philippe, H.,  
801 Lartillot, N., and Wörheide, G. (2015). Genomic data do not support comb jellies as the sister group  
802 to all other animals. *Proceedings of the National Academy of Sciences*, 112(50):201518127.
- 803 [Ponce et al., 2016] Ponce, D., Brinkman, D. L., Potriquet, J., and Mulvenna, J. (2016). Tentacle tran-  
804 scriptome and venom proteome of the pacific sea nettle, *Chrysaora fuscescens* (Cnidaria: Scyphozoa).  
805 *Toxins*, 8(4).
- 806 [Pratlong et al., 2015] Pratlong, M., Haguenaue, A., Chabrol, O., Klopp, C., Pontarotti, P., and  
807 Aurelle, D. (2015). The red coral ( *Corallium rubrum* ) transcriptome: a new resource for population  
808 genetics and local adaptation studies. *Molecular Ecology Resources*, 15(5):1205–1215.
- 809 [Price et al., 2010] Price, M. N., Dehal, P. S., and Arkin, A. P. (2010). FastTree 2 - Approximately  
810 maximum-likelihood trees for large alignments. *PLoS ONE*, 5(3).
- 811 [Putnam et al., 2008] Putnam, N. H., Butts, T., Ferrier, D. E. K., Furlong, R. F., Hellsten, U.,  
812 Kawashima, T., Robinson-Rechavi, M., Shoguchi, E., Terry, A., Yu, J.-K., Benito-Gutiérrez, E. L.,  
813 Dubchak, I., Garcia-Fernández, J., Gibson-Brown, J. J., Grigoriev, I. V., Horton, A. C., de Jong,  
814 P. J., Jurka, J., Kapitonov, V. V., Kohara, Y., Kuroki, Y., Lindquist, E., Lucas, S., Osoegawa,  
815 K., Pennacchio, L. a., Salamov, A. a., Satou, Y., Sauka-Spengler, T., Schmutz, J., Shin-I, T., Toy-  
816 oda, A., Bronner-Fraser, M., Fujiyama, A., Holland, L. Z., Holland, P. W. H., Satoh, N., and  
817 Rokhsar, D. S. (2008). The amphioxus genome and the evolution of the chordate karyotype. *Nature*,  
818 453(7198):1064–71.
- 819 [Qiu et al., 2015] Qiu, F., Ding, S., Ou, H., Wang, D., Chen, J., and Miyamoto, M. M. (2015). Tran-  
820 scriptome changes during the life cycle of the red sponge, *Mycale phyllophila* (Porifera, Demospon-  
821 giae, Poecilosclerida). *Genes*, 6(4):1023–1052.
- 822 [Ramoino et al., 2010] Ramoino, P., Ledda, F. D., Ferrando, S., Gallus, L., Bianchini, P., Diaspro, A.,  
823 Fato, M., Tagliaferro, G., and Manconi, R. (2010). Metabotropic ??-aminobutyric acid (GABAB)  
824 receptors modulate feeding behavior in the calcisponge *Leucandra aspera*. *Journal of Experimental  
825 Zoology Part A: Ecological Genetics and Physiology*, 313A(3):132–140.
- 826 [Riesgo et al., 2014a] Riesgo, A., Farrar, N., Windsor, P. J., Giribet, G., and Leys, S. P. (2014a). The  
827 Analysis of Eight Transcriptomes from All Poriferan Classes Reveals Surprising Genetic Complexity  
828 in Sponges. *Molecular biology and evolution*.
- 829 [Riesgo et al., 2014b] Riesgo, A., Peterson, K., Richardson, C., Heist, T., Strehlow, B., McCauley,  
830 M., Cotman, C., Hill, M., and Hill, A. (2014b). Transcriptomic analysis of differential host gene  
831 expression upon uptake of symbionts: a case study with *Symbiodinium* and the major bioeroding  
832 sponge *Cliona varians*. *BMC genomics*, 15(1):376.
- 833 [Ryan et al., 2010] Ryan, J. F., Pang, K., Mullikin, J. C., Martindale, M. Q., and Baxevanis,  
834 A. D. (2010). The homeodomain complement of the ctenophore *Mnemiopsis leidyi* suggests that  
835 Ctenophora and Porifera diverged prior to the ParaHoxozoa. *EvoDevo*, 1(1):9.
- 836 [Ryan et al., 2013] Ryan, J. F., Pang, K., Schnitzler, C. E., a. D. Nguyen, A.-d., Moreland, R. T.,  
837 Simmons, D. K., Koch, B. J., Francis, W. R., Havlak, P., Smith, S. a., Putnam, N. H., Haddock,  
838 S. H. D., Dunn, C. W., Wolfsberg, T. G., Mullikin, J. C., Martindale, M. Q., Baxevanis, A. D.,  
839 Comparative, N., and Program, S. (2013). The Genome of the Ctenophore *Mnemiopsis leidyi* and  
840 Its Implications for Cell Type Evolution. *Science*, 342(6164):1242592–1242592.
- 841 [Ryu et al., 2016] Ryu, T., Seridi, L., Moitinho-Silva, L., Oates, M., Liew, Y. J., Mavromatis, C.,  
842 Wang, X., Haywood, A., Lafi, F. F., Kupresanin, M., Sougrat, R., Alzahrani, M. A., Giles, E.,

- 843 Ghosheh, Y., Schunter, C., Baumgarten, S., Berumen, M. L., Gao, X., Aranda, M., Foret, S.,  
844 Gough, J., Voolstra, C. R., Hentschel, U., and Ravasi, T. (2016). Hologenome analysis of two  
845 marine sponges with different microbiomes. *BMC genomics*, 17(1):158.
- 846 [Sáez et al., 2009] Sáez, A. G., Lozano, E., and Zaldívar-Riverón, A. (2009). Evolutionary history of  
847 Na,K-ATPases and their osmoregulatory role. *Genetica*, 136(3):479–490.
- 848 [Sahlin et al., 2014] Sahlin, K., Vezzi, F., Nystedt, B., Lundeberg, J., and Arvestad, L. (2014). BESST  
849 - Efficient scaffolding of large fragmented assemblies. *BMC Bioinformatics*, 15(1):281.
- 850 [Sara et al., 2001] Sara, M., Sara, A., Nickel, M., and Brümmer, F. (2001). Three New Species  
851 of Tethya (Porifera: Demospongia) from German Aquaria. *Stuttgarter Beiträge zur Naturkunde*,  
852 631(15S):1–16.
- 853 [Schierwater et al., 2009] Schierwater, B., Kolokotronis, S., Eitel, M., and DeSalle, R. (2009). The  
854 Diploblast-Bilateria Sister hypothesis. *Communicative & Integrative Biology*, 2(5):1–3.
- 855 [Schuler et al., 2015] Schuler, a., Schmitz, G., Reft, A., Ozbek, S., Thurm, U., and Bornberg-Bauer,  
856 E. (2015). The rise and fall of TRP-N, an ancient family of mechanogated ion channels, in Metazoa.  
857 *Genome Biology and Evolution*, 7(6):1–27.
- 858 [Simakov et al., 2015] Simakov, O., Kawashima, T., Marlétaz, F., Jenkins, J., Koyanagi, R., Mitros,  
859 T., Hisata, K., Bredeson, J., Shoguchi, E., Gyoja, F., Yue, J.-X., Chen, Y.-C., Freeman, R. M.,  
860 Sasaki, A., Hikosaka-Katayama, T., Sato, A., Fujie, M., Baughman, K. W., Levine, J., Gonzalez,  
861 P., Cameron, C., Fritzenwanker, J. H., Pani, A. M., Goto, H., Kanda, M., Arakaki, N., Yamasaki,  
862 S., Qu, J., Cree, A., Ding, Y., Dinh, H. H., Dugan, S., Holder, M., Jhangiani, S. N., Kovar, C. L.,  
863 Lee, S. L., Lewis, L. R., Morton, D., Nazareth, L. V., Okwuonu, G., Santibanez, J., Chen, R.,  
864 Richards, S., Muzny, D. M., Gillis, A., Peshkin, L., Wu, M., Humphreys, T., Su, Y.-H., Putnam,  
865 N. H., Schmutz, J., Fujiyama, A., Yu, J.-K., Tagawa, K., Worley, K. C., Gibbs, R. A., Kirschner,  
866 M. W., Lowe, C. J., Satoh, N., Rokhsar, D. S., and Gerhart, J. (2015). Hemichordate genomes and  
867 deuterostome origins. *Nature*, pages 1–19.
- 868 [Simakov et al., 2013] Simakov, O., Marletaz, F., Cho, S.-J., Edsinger-Gonzales, E., Havlak, P., Hell-  
869 sten, U., Kuo, D.-H., Larsson, T., Lv, J., Arendt, D., Savage, R., Osoegawa, K., de Jong, P.,  
870 Grimwood, J., Chapman, J. a., Shapiro, H., Aerts, A., Otilar, R. P., Terry, A. Y., Boore, J. L.,  
871 Grigoriev, I. V., Lindberg, D. R., Seaver, E. C., Weisblat, D. a., Putnam, N. H., and Rokhsar, D. S.  
872 (2013). Insights into bilaterian evolution from three spiralian genomes. *Nature*, 493(7433):526–31.
- 873 [Simão et al., 2015] Simão, F. A., Waterhouse, R. M., Ioannidis, P., and Kriventseva, E. V. (2015).  
874 BUSCO : assessing genome assembly and annotation completeness with single-copy orthologs.  
875 *Genome analysis*, 31(June):9–10.
- 876 [Simion et al., 2017] Simion, P., Philippe, H., Baurain, D., Jager, M., Richter, D. J., Di Franco, A.,  
877 Roure, B., Satoh, N., Quéinnec, É., Ereskovsky, A., Lapébie, P., Corre, E., Delsuc, F., King, N.,  
878 Wörheide, G., and Manuel, M. (2017). A Large and Consistent Phylogenomic Dataset Supports  
879 Sponges as the Sister Group to All Other Animals. *Current Biology*, pages 1–10.
- 880 [Smith et al., 2011] Smith, S. M. E., Morgan, D., Musset, B., Cherny, V. V., Place, A. R., Hastings,  
881 J. W., and DeCoursey, T. E. (2011). Voltage-gated proton channel in a dinoflagellate. *Proceedings*  
882 *of the National Academy of Sciences*, 108(44):18162–18167.
- 883 [Sreedharan et al., 2010] Sreedharan, S., Shaik, J. H. A., Olszewski, P. K., Levine, A. S., Schiöth, H. B.,  
884 and Fredriksson, R. (2010). Glutamate, aspartate and nucleotide transporters in the SLC17 family  
885 form four main phylogenetic clusters: evolution and tissue expression. *BMC genomics*, 11(iii):17.
- 886 [Srivastava et al., 2008] Srivastava, M., Begovic, E., Chapman, J., Putnam, N. H., Hellsten, U.,  
887 Kawashima, T., Kuo, A., Mitros, T., Salamov, A., Carpenter, M. L., Signorovitch, A. Y., Moreno,  
888 M. a., Kamm, K., Grimwood, J., Schmutz, J., Shapiro, H., Grigoriev, I. V., Buss, L. W., Schier-  
889 water, B., Dellaporta, S. L., and Rokhsar, D. S. (2008). The Trichoplax genome and the nature of  
890 placozoans. *Nature*, 454(7207):955–60.
- 891 [Srivastava et al., 2010] Srivastava, M., Simakov, O., Chapman, J., Fahey, B., Gauthier, M. E. a.,  
892 Mitros, T., Richards, G. S., Conaco, C., Dacre, M., Hellsten, U., Larroux, C., Putnam, N. H.,

- 893 Stanke, M., Adamska, M., Darling, A., Degnan, S. M., Oakley, T. H., Plachetzki, D. C., Zhai, Y.,  
894 Adamski, M., Calcino, A., Cummins, S. F., Goodstein, D. M., Harris, C., Jackson, D. J., Leys, S. P.,  
895 Shu, S., Woodcroft, B. J., Vervoort, M., Kosik, K. S., Manning, G., Degnan, B. M., and Rokhsar,  
896 D. S. (2010). The Amphimedon queenslandica genome and the evolution of animal complexity.  
897 *Nature*, 466(7307):720–6.
- 898 [Stamatakis, 2014] Stamatakis, A. (2014). RAxML version 8: a tool for phylogenetic analysis and  
899 post-analysis of large phylogenies. *Bioinformatics*, 30(9):1312–1313.
- 900 [Stanke et al., 2008] Stanke, M., Diekhans, M., Baertsch, R., and Haussler, D. (2008). Using native and  
901 syntenically mapped cDNA alignments to improve de novo gene finding. *Bioinformatics*, 24(5):637–  
902 644.
- 903 [Stein, 1995] Stein, W. D. (1995). The sodium pump in the evolution of animal cells. *Philosophical*  
904 *transactions of the Royal Society of London. Series B, Biological sciences*, 349(1329):263–9.
- 905 [Strous et al., 2012] Strous, M., Kraft, B., Bisdorf, R., and Tegetmeyer, H. E. (2012). The bin-  
906 ning of metagenomic contigs for microbial physiology of mixed cultures. *Frontiers in Microbiology*,  
907 3(DEC):1–11.
- 908 [Suga et al., 2013] Suga, H., Chen, Z., de Mendoza, A., Sebé-Pedrós, A., Brown, M. W., Kramer, E.,  
909 Carr, M., Kerner, P., Vervoort, M., Sánchez-Pons, N., Torruella, G., Derelle, R., Manning, G., Lang,  
910 B. F., Russ, C., Haas, B. J., Roger, A. J., Nusbaum, C., and Ruiz-Trillo, I. (2013). The Capsaspora  
911 genome reveals a complex unicellular prehistory of animals. *Nature communications*, 4:2325.
- 912 [Versluis et al., 2015] Versluis, D., D’Andrea, M. M., Ramiro Garcia, J., Leimena, M. M., Hugenholtz,  
913 F., Zhang, J., Öztürk, B., Nylund, L., Sipkema, D., van Schaik, W., de Vos, W. M., Kleerebezem,  
914 M., Smidt, H., and van Passel, M. W. J. (2015). Mining microbial metatranscriptomes for expression  
915 of antibiotic resistance genes under natural conditions. *Scientific reports*, 5(January):11981.
- 916 [Whelan et al., 2015] Whelan, N. V., Kocot, K. M., Moroz, L. L., and Halanych, K. M. (2015). Error  
917 , signal , and the placement of Ctenophora sister to all other animals. *Proceedings of the National*  
918 *Academy of Sciences*, 112(18):1–6.
- 919 [Wray et al., 2015] Wray, G. A., Smith, A., Peterson, K., Donoghue, P., Benton, M., Thackray, J.,  
920 Budd, G., Marshall, C., Shu, D., Isozaki, Y., Zhang, X., Han, J., Maruyama, S., Walcott, C., Knoll,  
921 A., Walter, M., Narbonne, G., Christie-Blick, N., Raymond, P., Cloud, P., Budd, G., Jensen, S.,  
922 Briggs, D., Fortey, R., Morris, S. C., Seilacher, A., Bose, P., Pfluger, F., Rasmussen, B., Bengtson,  
923 S., Fletcher, I., McNaughton, N., Pecoits, E., Konhauser, K., Aubet, N., Heaman, L., Veroslavsky,  
924 G., Stern, R., Gingras, M., Hultgren, T., Cunningham, J., Yin, C., Stampanoni, M., Marone, F.,  
925 Donoghue, P., Bengtson, S., Gaucher, C., Poire, D., Bossi, J., Bettucci, L., Beri, A., Fedonkin,  
926 M., Simonetta, A., Ivantsov, A., Sprigg, R., Glaessner, M., Gehling, J., Seilacher, A., Retallack,  
927 G., Narbonne, G., Seilacher, A., Grazhdankin, D., Legouta, A., Li, C., Chen, J., Hua, T., Maloof,  
928 A., Tang, F., Bengtson, S., Wang, Y., Wang, X., Yin, C., Yin, Z., Grant, S., Grotzinger, J.,  
929 Watters, W., Knoll, A., Fedonkin, M., Vickers-Rich, P., Swalla, B., Trusler, P., Hall, M., Xiao, S.,  
930 Zhang, Y., Knoll, A., Chen, J.-Y., Oliveri, P., Li, C., Zhou, G., Gao, F., Hagadorn, J., Peterson,  
931 K., Davidson, E., Hagadorn, J., Chen, L., Xiao, S., Pang, K., Zhou, C., Yuan, X., Bengtson, S.,  
932 Budd, G., Cunningham, J., Margoliash, E., Brown, R., Richardson, M., Boulter, D., Ramshaw,  
933 J., Jefferies, R., Runnegar, B., Knoll, A., Carroll, S., Wray, G., Levinton, J., Shapiro, L., Aris-  
934 Brosou, S., Yang, Z., Bromham, L., Rambaut, A., Fortey, R., Cooper, A., Penny, D., Welch, J.,  
935 Fontanillas, E., Bromham, L., Wheat, C., Wahlberg, N., Schulte, J., Erwin, D., Laflamme, M.,  
936 Tweedt, S., Sperling, E., Pisani, D., Peterson, K., Filipowski, A., Murillo, O., Freydenzon, A., Tamura,  
937 K., Kumar, S., Tamura, K., Battistuzzi, F., Billing-Ross, P., Murillo, O., Filipowski, A., Kumar,  
938 S., Hug, L., Roger, A., Ho, S., Phillips, M., Sanderson, M., Thorne, J., Kishino, H., Painter, I.,  
939 Sanderson, M., Britton, T., Anderson, C., Jacquet, D., Lundqvist, S., Bremer, K., Shaul, S., Graur,  
940 D., Battistuzzi, F., Billing-Ross, P., Murillo, O., Filipowski, A., Kumar, S., Mello, B., Schrago, C.,  
941 Rambaut, A., Bromham, L., Kishino, H., Thorne, J., Bruno, W., Douzery, E., Snell, E., Baptiste,  
942 E., Delsuc, F., Philippe, H., Battistuzzi, F., Filipowski, A., Hedges, S., Kumar, S., Schwartz, R.,  
943 Mueller, R., Ho, S., Phillips, M., Drummond, A., Cooper, A., Blair, J., Hedges, S., Warnock, R.,  
944 Yang, Z., Donoghue, P., Battistuzzi, F., Billing-Ross, P., Murillo, O., Filipowski, A., Kumar, S., Ayala,

- 945 F., Rzhetsky, A., Ayala, F., Peterson, K., Lyons, J., Nowak, K., Takacs, C., Wargo, M., McPeck,  
946 M., Cutler, D., Chernikova, D., Motamedi, S., Csuros, M., Koonin, E., Rogozin, I., Richter, D.,  
947 King, N., Dunn, C., Giribet, G., Edgecombe, G., Hejnol, A., Emes, R., Grant, S., Burkhardt, P.,  
948 Hejnol, A., Martindale, M., Balavoine, G., Adoutte, A., Hirth, F., Miller, D., Ball, E., Northcutt,  
949 R., Strausfeld, N., Hirth, F., Tosches, M., Arendt, D., Lyons, T., Reinhard, C., Planavsky, N.,  
950 Planavsky, N., Sperling, E., Frieder, C., Raman, A., Girguis, P., Levin, L., Knoll, A., Stanley, S.,  
951 Peterson, K., Cotton, J., Gehling, J., Pisani, D., Butterfield, N., Benito-Gutierrez, E., Arendt, D.,  
952 Holland, L., Carvalho, J., Escriva, H., Laudet, V., Schubert, M., Shimeld, S., Yu, J.-K., Turner,  
953 S., Young, J., Pisani, D., Poling, L., Lyons-Weiler, M., Hedges, S., Otsuka, J., Sugaya, N., Hedges,  
954 S., Blair, J., Venturi, M., Shoe, J., and Gu, X. (2015). Molecular clocks and the early evolution  
955 of metazoan nervous systems. *Philosophical transactions of the Royal Society of London. Series B,*  
956 *Biological sciences*, 370(1684):424–431.
- 957 [Wu and Watanabe, 2005] Wu, T. D. and Watanabe, C. K. (2005). GMAP: a genomic mapping and  
958 alignment program for mRNA and EST sequences. *Bioinformatics*, 21(9):1859–1875.
- 959 [Zakon, 2012] Zakon, H. H. (2012). Adaptive evolution of voltage-gated sodium channels: the first 800  
960 million years. *Proceedings of the National Academy of Sciences of the United States of America*, 109  
961 Suppl(Supplement\_1):10619–25.
- 962 [Zapata et al., 2015] Zapata, F., Goetz, F. E., Smith, S. A., Howison, M., Siebert, S., Church, S. H.,  
963 Sanders, S. M., Ames, C. L., McFadden, C. S., France, S. C., Daly, M., Collins, A. G., Haddock,  
964 S. H. D., Dunn, C. W., and Cartwright, P. (2015). Phylogenomic Analyses Support Traditional  
965 Relationships within Cnidaria. *Plos One*, 10(10):e0139068.

966 **1 Supplemental Figures**

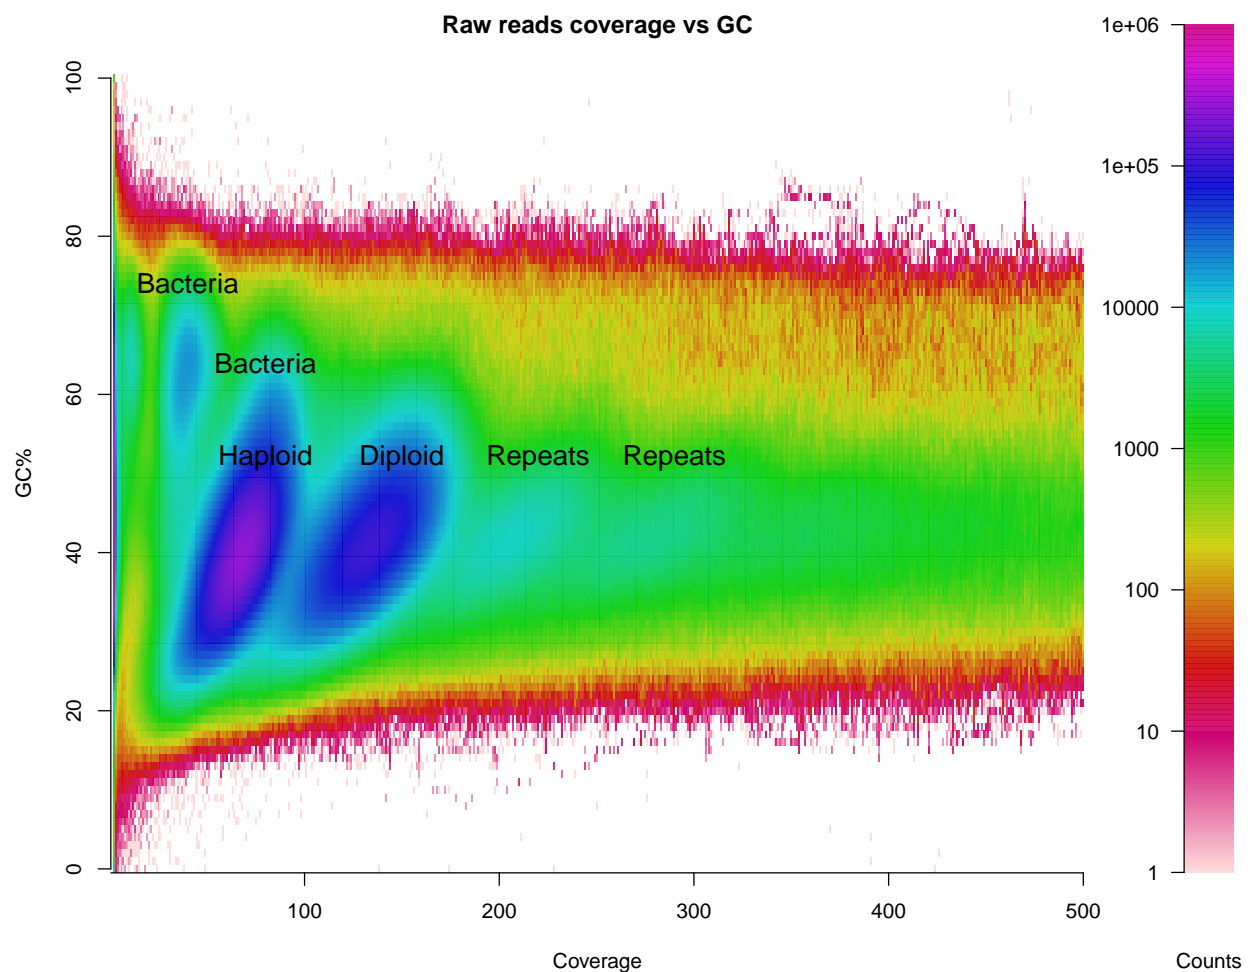

**Supplemental Figure 1: Coverage vs. GC content for reads**

Lava lamp plot of the unfiltered paired-end reads. Coverage was calculated as the median 31-mer coverage for each read. High-GC reads indicate the presence of bacteria in the raw reads.



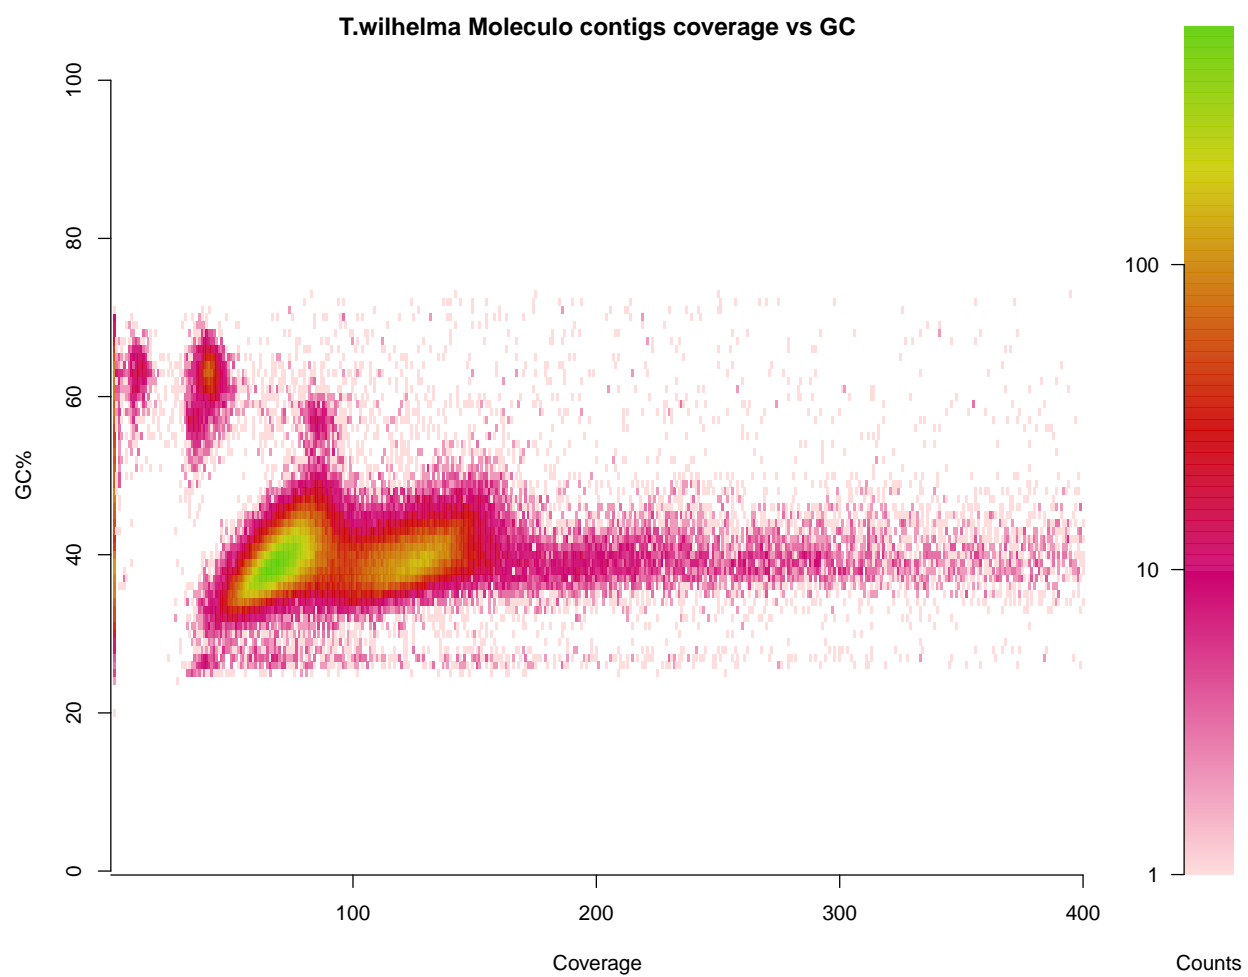

**Supplemental Figure 2: Coverage vs. GC content for genomic scaffolds**  
Heat map of percent GC versus coverage of reads for the all Moleculo reads.

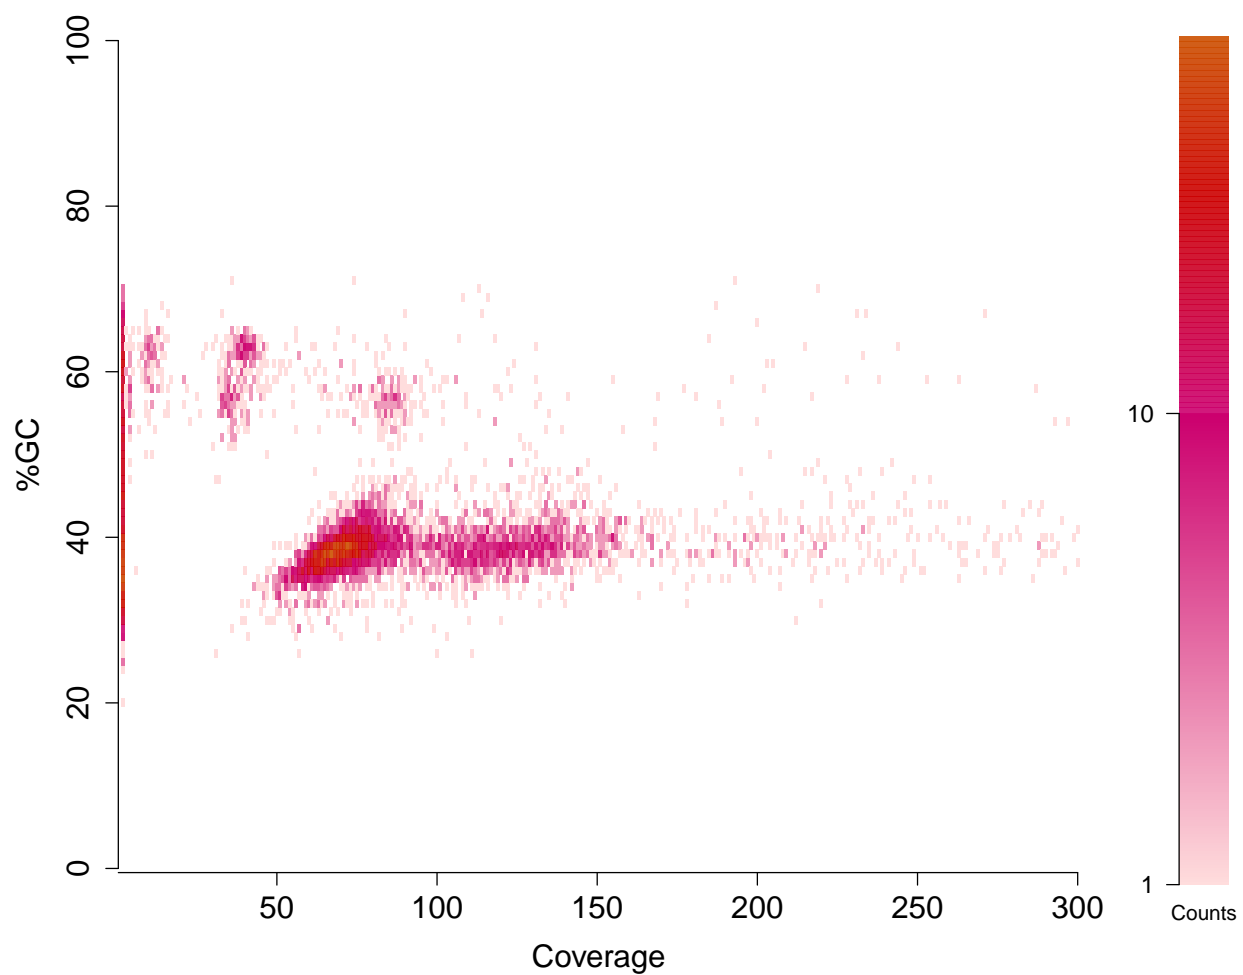

**Supplemental Figure 3: Coverage vs. GC content for genomic scaffolds**

Scatterplot of percent GC versus coverage of reads for the all scaffolds. The 1,040 contigs with zero coverage are carried over from low-coverage Moleculo reads, and likely derive from amplified contaminating DNA.

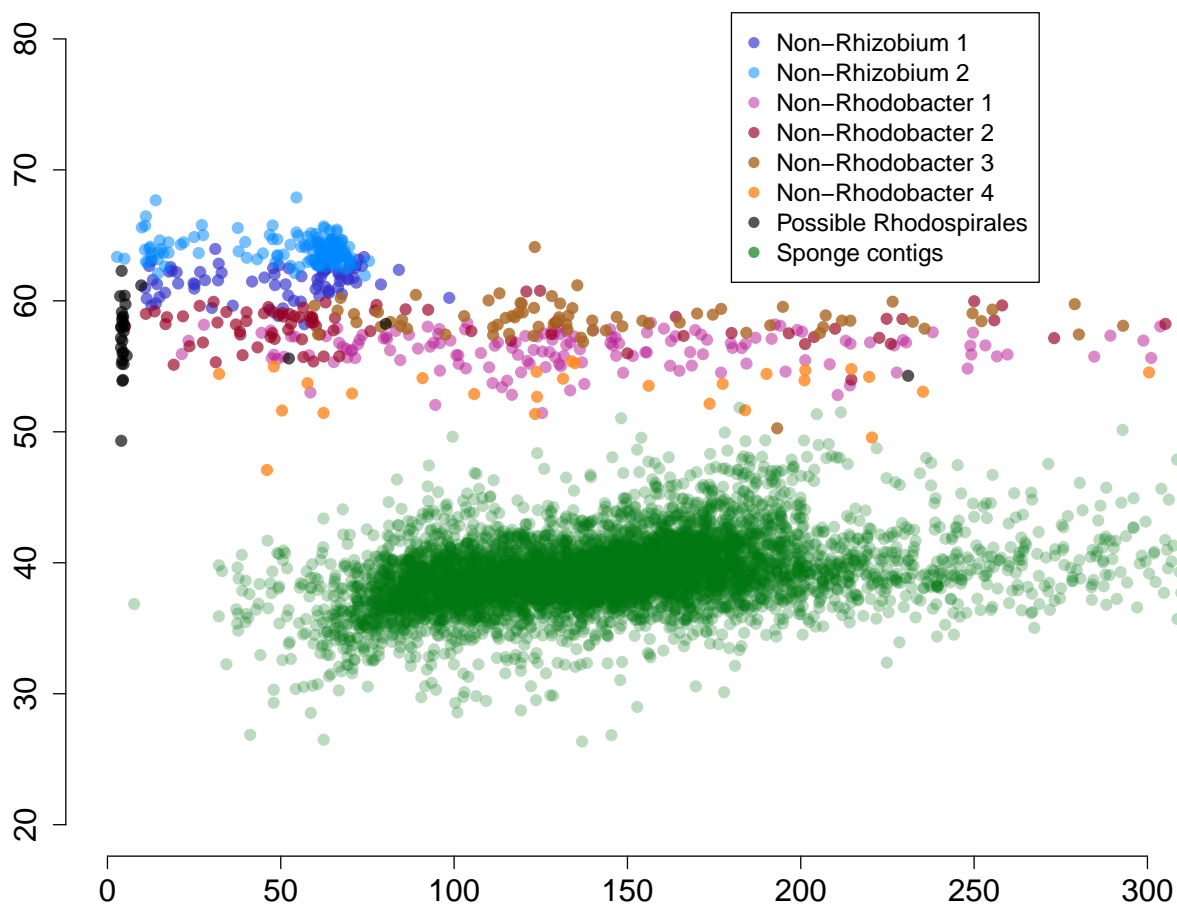

**Supplemental Figure 4: Separation of contigs derived from bacterial symbionts**

Sponge scaffolds are in green, while scaffolds assigned to bacteria are identified by blue (*Rhizobiales*) and pink (*Rhodobacter*). Low-coverage contigs were removed. Seven bins were identified with MetaWatt to separate the bacterial contigs, though several bins appeared to correspond to the same bacteria.

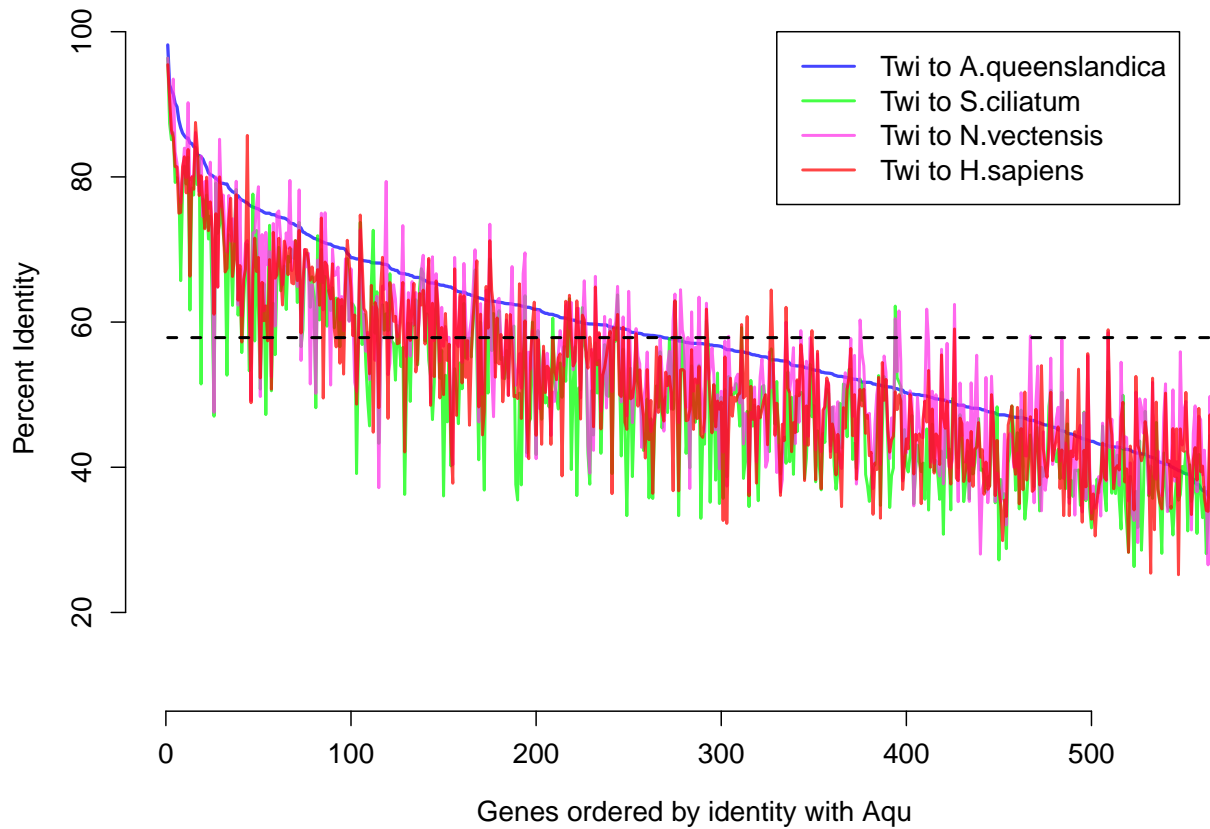

**Supplemental Figure 5: Percent identity between sponges**

Calculated protein percent identity between 570 one-to-one orthologs between *T. wilhelma* and *A. queenslandica* (blue), *S. ciliatum* (green), the anemone *N. vectensis* (purple) and human (red). Average identity between *T. wilhelma* and *A. queenslandica* is shown as the dotted black line at 57%.

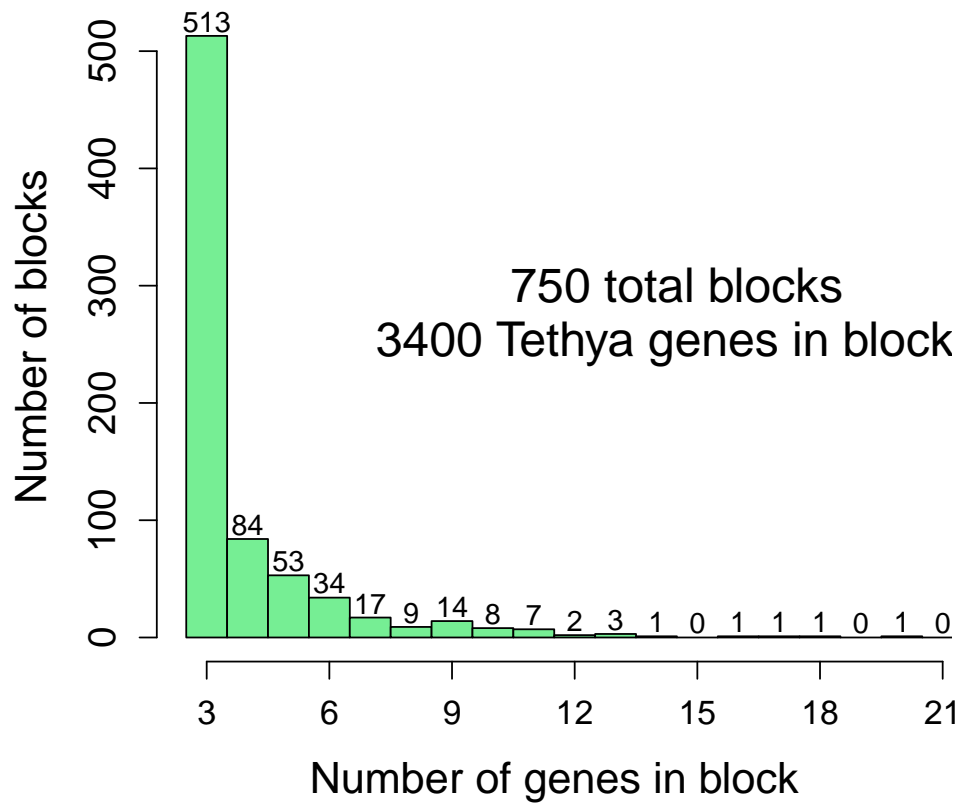

**Supplemental Figure 6: Length of microsyntenic blocks**

Histogram of number of genes in detected microsyntenic blocks between *T. wilhelma* and *A. queenslandica* v2.0 gene models.

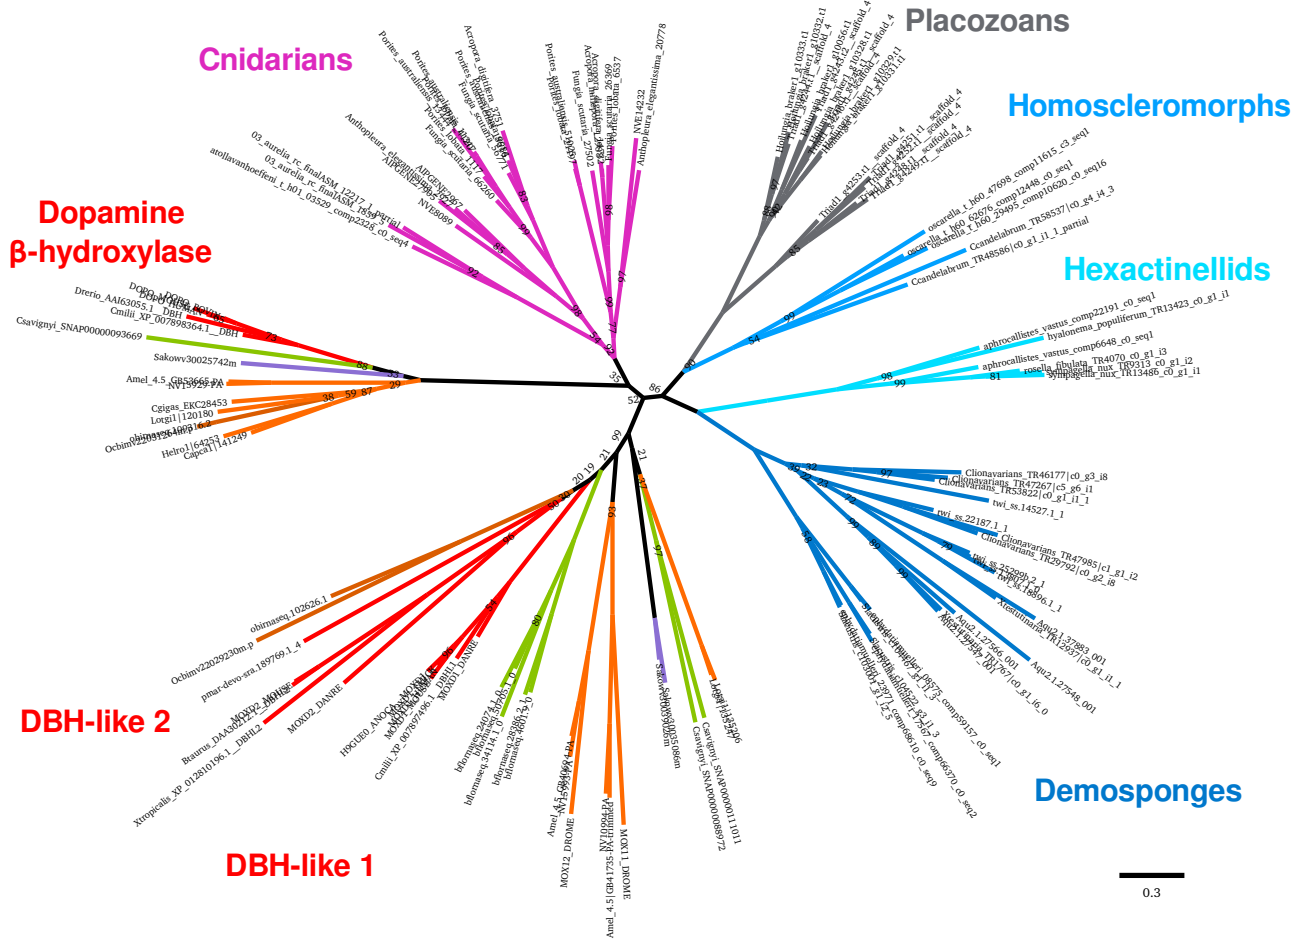

**Supplemental Figure 7: Dopamine  $\beta$ -hydroxylase homologs across metazoans**

Tree of DBH and DBH-like proteins across all metazoan groups, generated with RAXML using the PROTGAMMALG model. Bootstrap values are 100 unless otherwise shown.



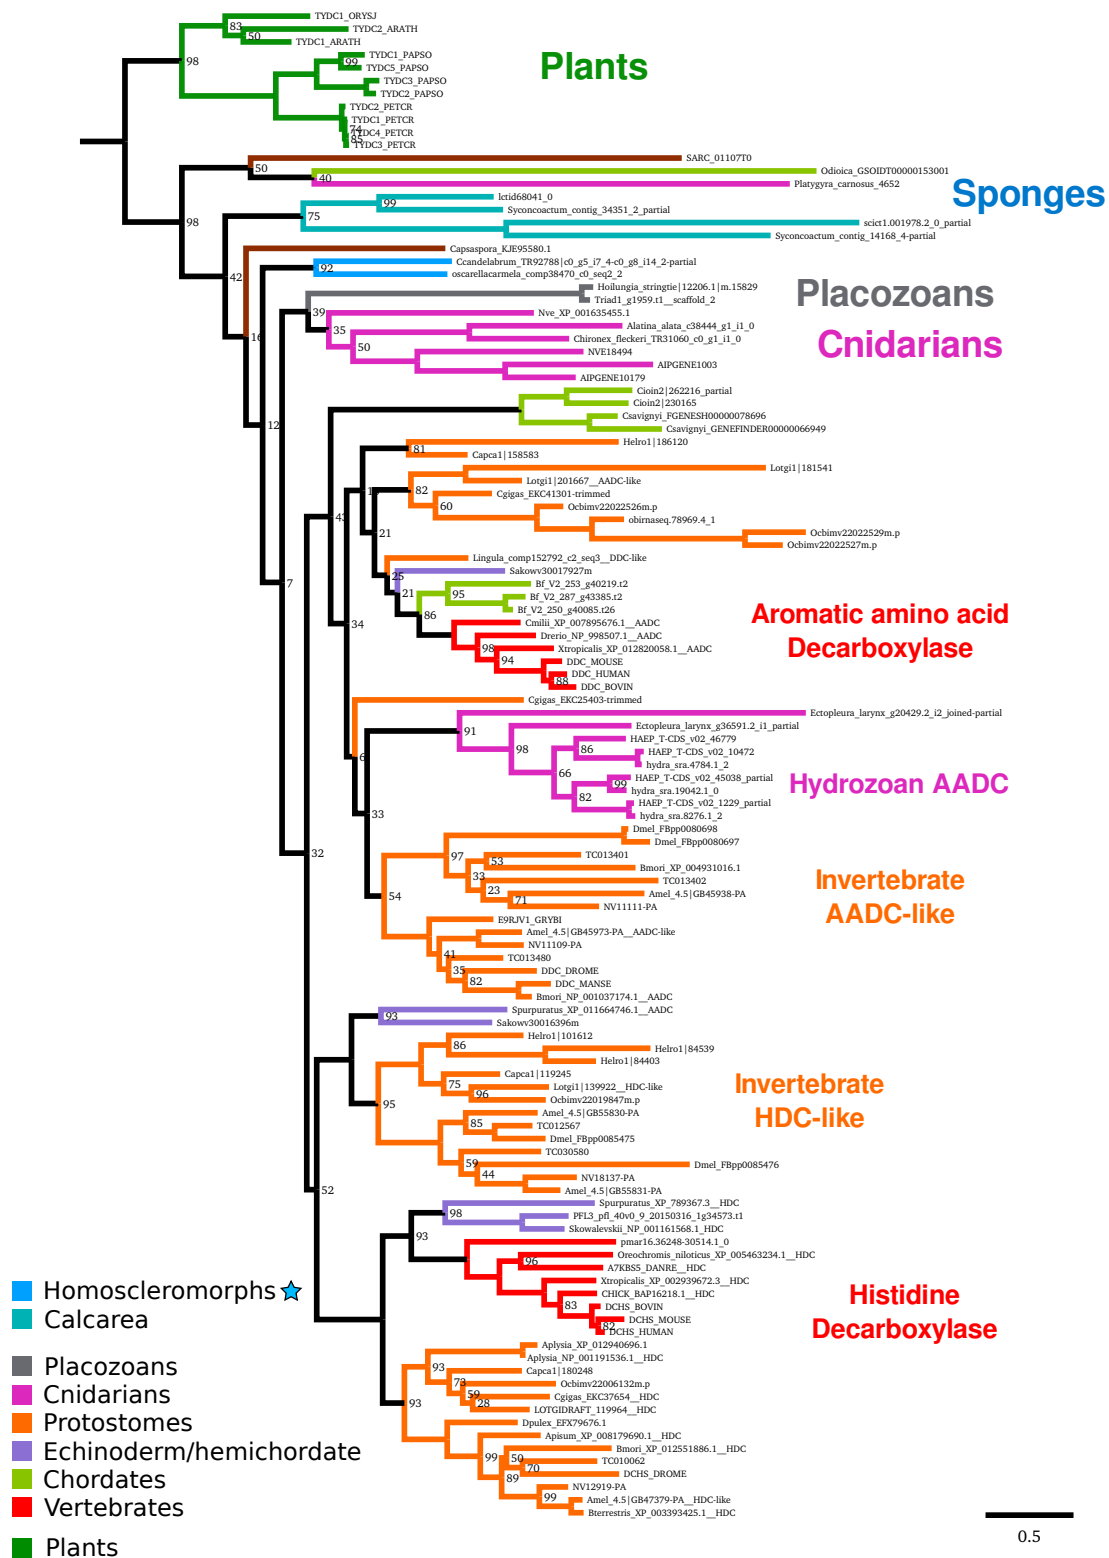

**Supplemental Figure 8: Aromatic amino acid decarboxylase homologs across metazoans**  
 Tree of AADC and histidine decarboxylase (HDC) proteins across all metazoan groups, generated with RAXML using the PROTGAMMALG model. Bootstrap values are 100 unless otherwise shown.

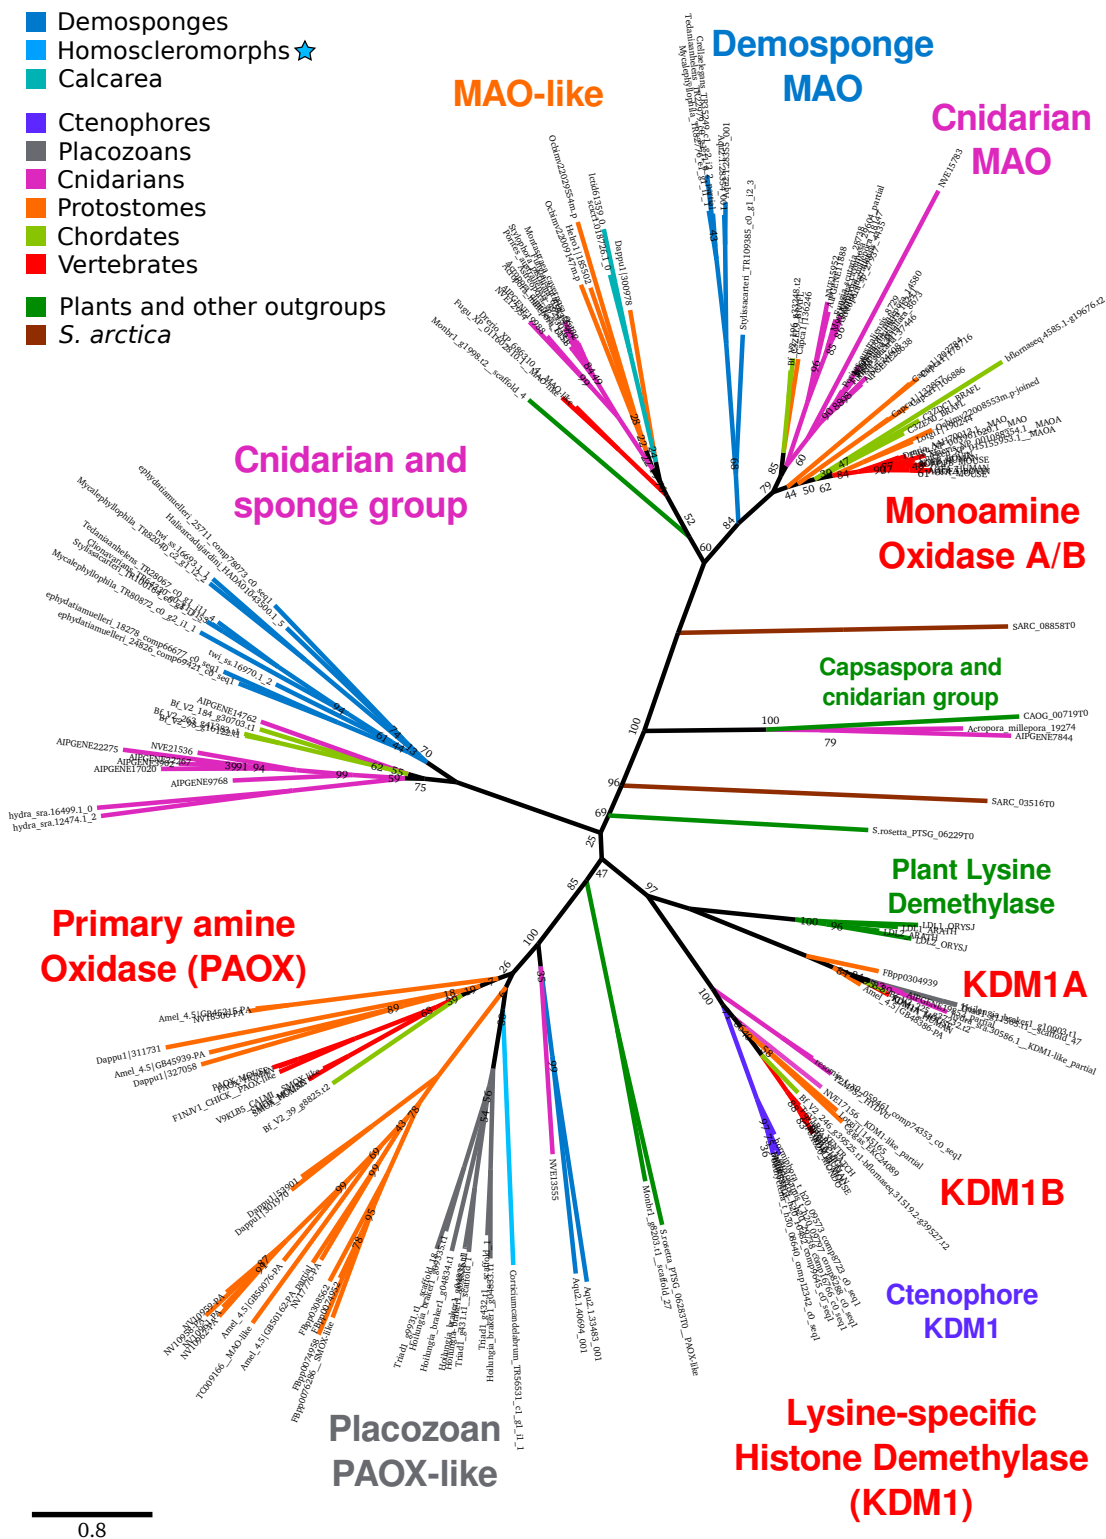

**Supplemental Figure 9: Monoamine oxidase homologs across metazoans**

Tree of monoamine oxidase (MAO) and related proteins across all metazoan groups, generated with RAxML using the PROTGAMMALG model. Searches for lysine demethylase (KDM1) and primary amine oxidase (PAOX) were not exhaustive, and were added to display the sole positions of ctenophores (only have KDM) and placozoans (only have PAOX) in this protein family. Bootstrap values are 100 unless otherwise shown.

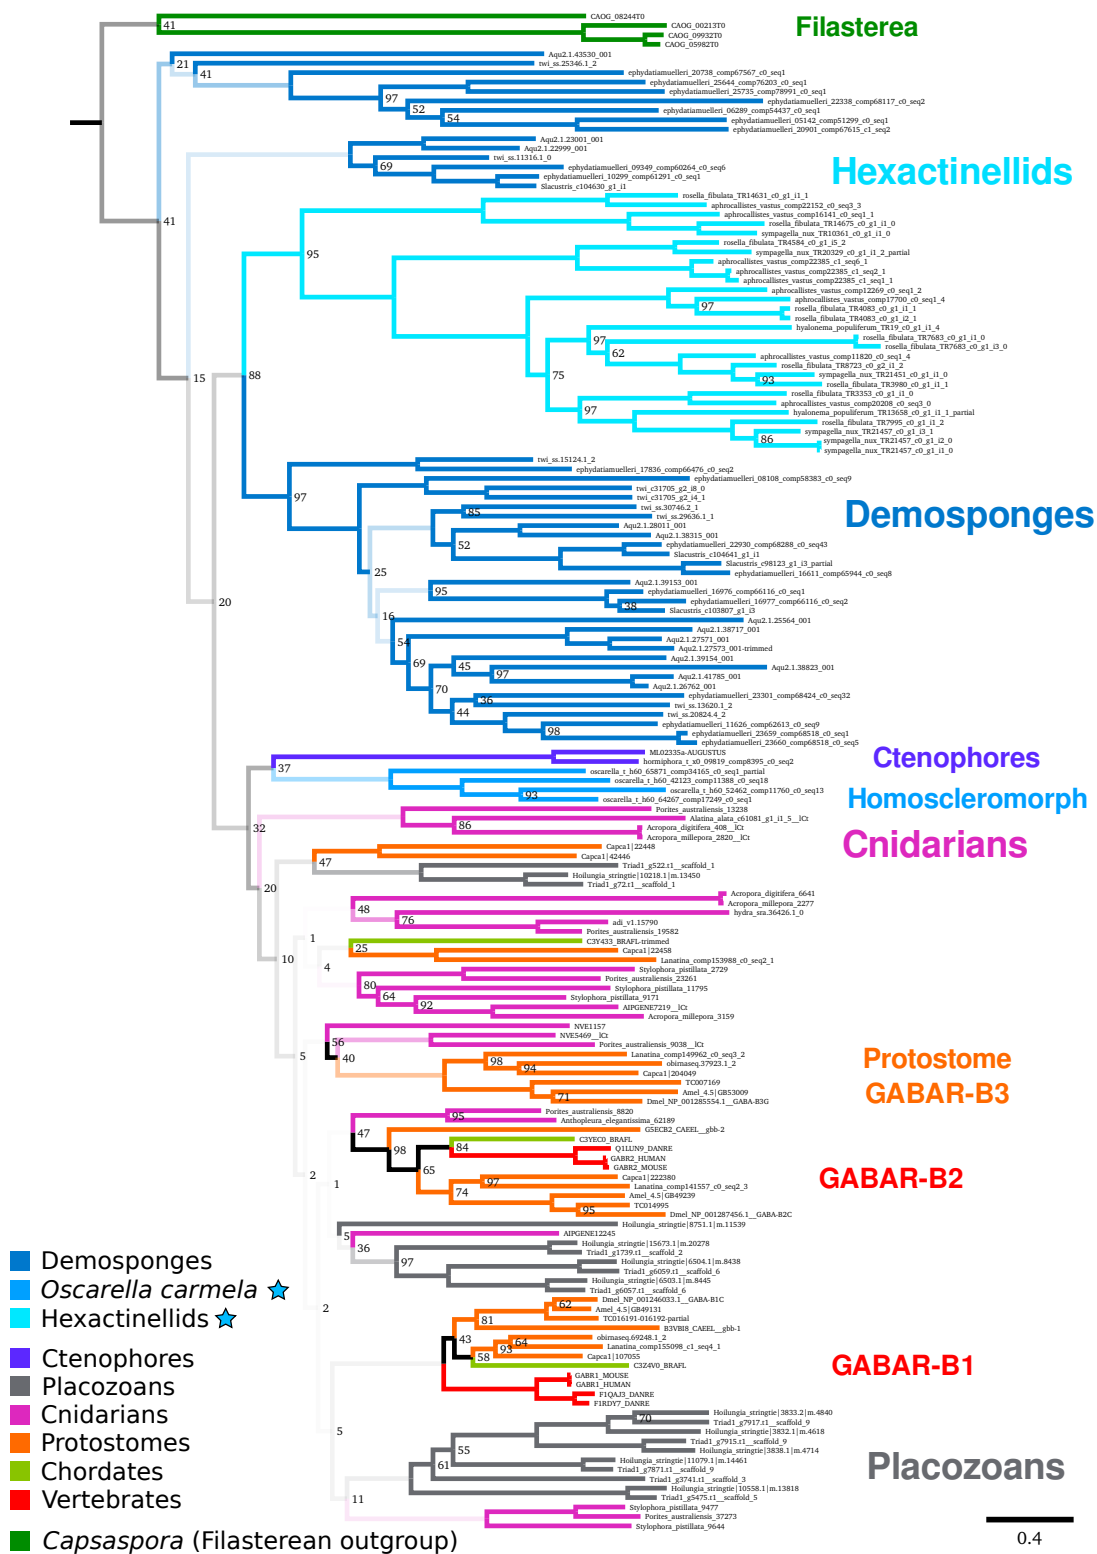

Supplemental Figure 10: mGABA receptors across metazoans

Complete version of Figure 4 metabotropic GABA receptor (GABA-B type) protein tree generated with RAxML. Bootstrap values are 100 unless otherwise shown. The majority of deeper nodes were poorly resolved; branch transparency corresponds to bootstrap support for values under 50, meaning half-transparent.

|                                                   | 246      | 268       | 287     | 367      | 395     | 446      |
|---------------------------------------------------|----------|-----------|---------|----------|---------|----------|
| <i>GABR1_HUMAN</i>                                | PGEAIV   | YGSAV     | FRTPSA  | GLFYETEA | LIGWYA  | GGFQAPL  |
| <i>GABR1_MOUSE</i>                                | PGEAIV   | YGSAV     | FRTPSA  | GLFYETEA | LIGWYA  | GGFQAPL  |
| <i>F1QA3_DANRE</i>                                | PGEAIV   | YGSAV     | FRTPSA  | GLFYETEA | LIGWYA  | GGFQAPL  |
| <i>Dmel_NP_001246033.1_GABA-B1C</i>               | AGSITV   | YGSAV     | FRTPSA  | GLFVVVAA | FVIGWYE | EGYQAPL  |
| <i>Amel_4.5 GB49131</i>                           | AGSITV   | YGSAV     | FRTPSA  | GLFVVVAA | FVIGWYE | EGYQAPL  |
| <i>C3Z4V0_BRAFL</i>                               | TGSSIV   | YGSAV     | FRTPSA  | GVFVEDMA | FVIGWYP | GGYFAPL  |
| <i>B3VB18_CAEEI_gbb-1</i>                         | TGSSIV   | YGSAV     | FRTPSA  | GLFYVTEA | FVIGWYA | GGFFAPL  |
| <i>GABR2_HUMAN</i>                                | GGVETP   | FAAITP    | FRTPSD  | GOFOENMA | IPGVWYE | GPSKPHG  |
| <i>GABR2_MOUSE</i>                                | GGVETP   | FAAITP    | FRTPSD  | GOFOENMA | IPGVWYE | GPSKPHG  |
| <i>O1LUN9_DANRE</i>                               | GGVETP   | FAAITP    | FRTPSD  | GOFOENLA | IPGVWYO | ETSKPHG  |
| <i>C3VEC0_BRAFL</i>                               | GGTETP   | YVIGTPEF  | FRTPSD  | GLFERMA  | LMGFWYS | RTMPHGY  |
| <i>Dmel_NP_001287456.1_GABA-B2C</i>               | GAAETHV  | YADHPHMT  | FRVWPE  | GNFHEFA  | IMGFWYT | EYSRPHGY |
| <i>Amel_4.5 GB49239</i>                           | GAAETHV  | YADHPHMT  | FRVWPE  | GNFHEFA  | IMGFWYT | EYSRPHGY |
| <i>HoiIungia_stringtie 15673.1 m.20278</i>        | GSGYISV  | YGAISP    | LRTIPSD | ASFYEKEG | LLGWLST | DTSYVSNF |
| <i>Triad1_g1739.t1_scaffold_2</i>                 | GSGYISV  | YGAISP    | LRTIPSD | ASFYEKEG | FLGWLST | ESYGVSNF |
| <i>HoiIungia_stringtie 6503.1 m.8445</i>          | GAGYISV  | YGAISP    | LRTIESE | ASFYEDTG | LIGWLE  | QOODIYAA |
| <i>Triad1_g6057.t1_scaffold_6</i>                 | GAGYISV  | YGAISP    | LRTIESE | ASFYEDTG | LIGWLE  | KRDLDYAA |
| <i>HoiIungia_stringtie 6504.1 m.8438</i>          | GADFSTV  | FGSPTVL   | YRTPSSD | ANFYEDLG | LLGLWQ  | QDPLGYYP |
| <i>G5ECB2_CAEEI_gbb-2</i>                         | GGCETV   | YAEHAKFA  | FRVWPGS | VDDVEEMA | LPGWYHS | PNNTRWGY |
| <i>AIPGENE12245</i>                               | GAGYSKC  | YSSIPDLS  | YRTPDD  | GNFVGOGA | LLGWYIE | RRDDYSY  |
| <i>HoiIungia_stringtie 10558.1 m.13818</i>        | GAONSRC  | HGSTITLS  | FRTALSD | AIGAPVI  | LVGWYP  | TMTLRAY  |
| <i>Triad1_g5475.t1_scaffold_5</i>                 | GAONSRS  | HGSTITLS  | FRTALSD | AIGAPVI  | LVGWYP  | TMTLRAY  |
| <i>HoiIungia_stringtie 11079.1 m.14461</i>        | GPVLSIC  | NAAASATLS | FRTALSD | VYAYPDMT | LLGWYF  | YLASVHTF |
| <i>HoiIungia_stringtie 3832.1 m.4618</i>          | GPVLSIAV | PSSAMKL   | MRTALSD | LFAYSVKM | LPGFYF  | PLLGSYTY |
| <i>HoiIungia_stringtie 3833.2 m.4840</i>          | GPVLSYI  | HTASMTL   | FRTALSD | LFAYSPIA | MPGFYF  | PLYGSYSY |
| <i>Triad1_g7917.t1_scaffold_9</i>                 | GPVLSIV  | HTASMLV   | FRTALSD | LFAYPSKA | LPGFYL  | PLSGYSY  |
| <i>HoiIungia_stringtie 3838.1 m.4714</i>          | GPVLSIV  | HTASMLV   | FRTALSD | LFAYPSKA | LPGFYL  | PLSGYSY  |
| <i>Triad1_g3741.t1_scaffold_3</i>                 | GPLITVG  | SGVSPAL   | FRTIPSD | LNAYPGQI | LPGLWLY | HLSGYTY  |
| <i>Capca1 42446</i>                               | AAANSLE  | YAVSPTLS  | FRTIPSD | TICMMPQA | MPGFWD  | HATNLATA |
| <i>Capca1 22448</i>                               | GGGSSIV  | YGCMPSLS  | FRTIPE  | TASVEDEM | FANWFD  | TGKDFGA  |
| <i>HoiIungia_stringtie 10218.1 m.13450</i>        | GAACSI   | YASASP    | FRTIPE  | AGFYSPQG | IPGLWLG | GAIDYAS  |
| <i>Triad1_g72.t1_scaffold_1</i>                   | GAACSI   | YASASP    | FRTIPE  | AGFYSPQG | IPGLWLG | GAIDYAS  |
| <i>Triad1_g522.t1_scaffold_1</i>                  | GSACTV   | YASASP    | FRTIPE  | GGFYSSQG | IPGLWLG | GAIDYAS  |
| <i>Capca1 22458</i>                               | GSACTV   | YASASP    | FRTIPE  | TGFPSPSG | IPGVWFT | GGKKHGF  |
| <i>Lanatina_comp153988_c0_seq2_1</i>              | GGGSSIE  | YGAAPDLS  | FRTIRSD | YNSAKEA  | IPGVWMA | GYNPHATF |
| <i>AIPGENE7219</i>                                | GGGSSIE  | YGAAPDLS  | FRTIRSD | YNSAKEA  | IPGVWMA | GYNPHATF |
| <i>C3Y433_BRAFL-trimmed</i>                       | GGGSSIE  | YGAAPDLS  | FRTIRSD | YNSAKEA  | IPGVWMA | GYNPHATF |
| <i>HoiIungia_stringtie 8751.1 m.11539</i>         | GGGSSIE  | YGAAPDLS  | FRTIRSD | YNSAKEA  | IPGVWMA | GYNPHATF |
| <i>Dmel_NP_00128554.1_GABA-B3G</i>                | GTAETEV  | FGASAP    | LRTIAPD | GSFQOLA  | LPSEFTI | TYSKLAG  |
| <i>Amel_4.5 GB53009</i>                           | GTAETEV  | FGASAP    | LRTIAPD | GSFQOLA  | LPSEFTI | TYSKLAG  |
| <i>Lanatina_comp149962_c0_seq3_2</i>              | GSSSDV   | HASASP    | YRLLAAD | GSFEDIA  | LVGDFIT | TRSAPAQ  |
| <i>NVE5469 23-200</i>                             | GPACSAV  | YASADSL   | YRTPDSD | GMFYEDAA | LLDWAD  | TANLVVY  |
| <i>twi_ss.15124.1_2 34-214</i>                    | GADCSIA  | PLSSPDL   | LRTVSSD | LSVYPAYA | TFAWYP  | ALFLYQAF |
| <i>ephydatiumuelleri_17836_comp66476_c0_seq2</i>  | GADCSIS  | PLSSPDL   | LRTVSSD | VNTYPHA  | YFAWYP  | SLODCVY  |
| <i>oscarella_t_h60_42123_comp11388_c0_seq18</i>   | AEGCTIV  | FLSSPDL   | YRLTAP  | GLFYEEVG | FTGMYD  | DFQQYTAY |
| <i>oscarella_t_h60_52462_comp11760_c0_seq13</i>   | AAGCSIV  | FLSSPDL   | HQLNPDE | ALLYEPTA | FPGWYH  | QF TYAAY |
| <i>oscarella_t_h60_64267_comp17249_c0_seq1</i>    | AEGCSIV  | FLSSPDL   | HQLNPDE | GLFYEEVG | FVGWFO  | DFHYTYAY |
| <i>Aqu2.1.25564_001</i>                           | GGGSLV   | YSSPDL    | FRTIPSD | LNCPKIS  | TLGWYP  | DDHSIESY |
| <i>Aqu2.1.26762_001</i>                           | GGGSLV   | YSSPDL    | FRTIPSD | LNCPKIS  | TLGWYP  | DDHSIESY |
| <i>Aqu2.1.41785_001</i>                           | GSGCSVA  | FSSSVHLR  | FQIYVSE | LNMWPKA  | LYGWY   | QPTVYAHM |
| <i>Aqu2.1.39154_001</i>                           | GAGCSAA  | YSSAAPML  | FRTIPSD | LNMWPKA  | LYGWY   | QPTVYAHM |
| <i>twi_ss.13620.1_2</i>                           | GCGCSVA  | YGAASITLS | FRTIPSI | LNMWPKA  | LYGWY   | QPTVYAHM |
| <i>twi_ss.20824.4_2</i>                           | GCGCSVA  | YGAASITLS | FRTIPSI | LNMWPKA  | LYGWY   | QPTVYAHM |
| <i>ephydatiumuelleri_23659_comp68518_c0_seq1</i>  | GCGCSVA  | YGAASITLS | FRTIPSI | LNMWPKA  | LYGWY   | QPTVYAHM |
| <i>ephydatiumuelleri_23660_comp68518_c0_seq5</i>  | GCGCSVA  | YGAASITLS | FRTIPSI | LNMWPKA  | LYGWY   | QPTVYAHM |
| <i>ephydatiumuelleri_11626_comp62613_c0_seq9</i>  | GCGCSVA  | YGAASITLS | FRTIPSI | LNMWPKA  | LYGWY   | QPTVYAHM |
| <i>ephydatiumuelleri_23301_comp68424_c0_seq32</i> | GCGCSVA  | YGAASITLS | FRTIPSI | LNMWPKA  | LYGWY   | QPTVYAHM |
| <i>Aqu2.1.27571_001</i>                           | GCGCSVA  | YGAASITLS | FRTIPSI | LNMWPKA  | LYGWY   | QPTVYAHM |
| <i>Aqu2.1.27573_001-trimmed</i>                   | GCGCSVA  | YGAASITLS | FRTIPSI | LNMWPKA  | LYGWY   | QPTVYAHM |
| <i>Aqu2.1.38717_001</i>                           | GCGCSVA  | YGAASITLS | FRTIPSI | LNMWPKA  | LYGWY   | QPTVYAHM |
| <i>Aqu2.1.28011_001</i>                           | GCGCSVA  | YGAASITLS | FRTIPSI | LNMWPKA  | LYGWY   | QPTVYAHM |
| <i>Aqu2.1.38315_001</i>                           | GCGCSVA  | YGAASITLS | FRTIPSI | LNMWPKA  | LYGWY   | QPTVYAHM |
| <i>twi_ss.29636.1_1</i>                           | GAGCSVA  | CVSSPEL   | FQIYVSE | LNMWPKA  | LYGWY   | QPTVYAHM |
| <i>ephydatiumuelleri_22930_comp68288_c0_seq43</i> | GAGCSVA  | CVSSPEL   | FQIYVSE | LNMWPKA  | LYGWY   | QPTVYAHM |
| <i>ephydatiumuelleri_16611_comp65944_c0_seq8</i>  | GAGCSVA  | CVSSPEL   | FQIYVSE | LNMWPKA  | LYGWY   | QPTVYAHM |
| <i>twi_ss.30746.2_1</i>                           | GAGCSVA  | CVSSPEL   | FQIYVSE | LNMWPKA  | LYGWY   | QPTVYAHM |
| <i>Aqu2.1.38823_001</i>                           | GAGCSVA  | CVSSPEL   | FQIYVSE | LNMWPKA  | LYGWY   | QPTVYAHM |
| <i>Aqu2.1.39153_001</i>                           | GAGCSVA  | CVSSPEL   | FQIYVSE | LNMWPKA  | LYGWY   | QPTVYAHM |
| <i>ephydatiumuelleri_16977_comp66116_c0_seq2</i>  | GAGCSVA  | CVSSPEL   | FQIYVSE | LNMWPKA  | LYGWY   | QPTVYAHM |
| <i>ephydatiumuelleri_16976_comp66116_c0_seq1</i>  | GAGCSVA  | CVSSPEL   | FQIYVSE | LNMWPKA  | LYGWY   | QPTVYAHM |
| <i>twi_c31705_g2_i4_1</i>                         | GAGCSVA  | CVSSPEL   | FQIYVSE | LNMWPKA  | LYGWY   | QPTVYAHM |
| <i>twi_c31705_g2_i8_0</i>                         | GAGCSVA  | CVSSPEL   | FQIYVSE | LNMWPKA  | LYGWY   | QPTVYAHM |
| <i>ephydatiumuelleri_08108_comp58383_c0_seq9</i>  | GAGCSVA  | CVSSPEL   | FQIYVSE | LNMWPKA  | LYGWY   | QPTVYAHM |
| <i>Aqu2.1.23001_001 19-196</i>                    | GAGCSVA  | CVSSPEL   | FQIYVSE | LNMWPKA  | LYGWY   | QPTVYAHM |
| <i>twi_ss.11316.1_0 38-229</i>                    | GAGCSVA  | CVSSPEL   | FQIYVSE | LNMWPKA  | LYGWY   | QPTVYAHM |
| <i>ephydatiumuelleri_10299_comp61291_c0_seq1</i>  | GAGCSVA  | CVSSPEL   | FQIYVSE | LNMWPKA  | LYGWY   | QPTVYAHM |
| <i>ephydatiumuelleri_09349_comp60264_c0_seq6</i>  | GAGCSVA  | CVSSPEL   | FQIYVSE | LNMWPKA  | LYGWY   | QPTVYAHM |
| <i>hydra_sra.36426.1_0 39-213</i>                 | GPPYIEQ  | YGANPEFE  | FQIYVSE | ALFVSGA  | LFEILP  | KCDENLAY |
| <i>hormiphora_t_x0_09819_comp8395_c0_seq2</i>     | GPVETDV  | FASSEFS   | LRLTPVE | ANFETDA  | LPSLIP  | KEDKAGSL |
| <i>ML02335a-AUGUSTUS</i>                          | GPVETDV  | FASSEFS   | LRLTPVE | ANFETDA  | LPSLIP  | KEDKAGSL |
| <i>Aqu2.1.43530_001</i>                           | GPVETDV  | FASSEFS   | LRLTPVE | ANFETDA  | LPSLIP  | KEDKAGSL |
| <i>twi_ss.25346.1_2</i>                           | GPVETDV  | FASSEFS   | LRLTPVE | ANFETDA  | LPSLIP  | KEDKAGSL |
| <i>ephydatiumuelleri_25735_comp78991_c0_seq1</i>  | GPVETDV  | FASSEFS   | LRLTPVE | ANFETDA  | LPSLIP  | KEDKAGSL |
| <i>ephydatiumuelleri_25644_comp76203_c0_seq1</i>  | GLACSDS  | VSIATPSLN | PRPISSS | AFLLGPVA | FHDRLS  | IDLLYGPV |
| <i>ephydatiumuelleri_06289_comp54437_c0_seq1</i>  | GPLCSIA  | VHLSAAL   | GISTID  | FSLHQAQ  | NA-DIPL | VDSDFNF  |
| <i>ephydatiumuelleri_05142_comp51299_c0_seq1</i>  | GPRYNS   | VHMCQSNLG | TSITPC  | VNIIGILT | FLRTRK  | SINKLNGA |
| <i>ephydatiumuelleri_20901_comp67615_c1_seq2</i>  | GLSCYDL  | AHISFALG  | VGIPSM  | AFIIGSSA | FLYRKL  | TTSLRGNL |
| <i>ephydatiumuelleri_22338_comp68117_c0_seq2</i>  | GPCSIES  | LHMASPF   | FGMAGSA | LLASDLA  | QVEIIL  | ASPWANL  |
| <i>ephydatiumuelleri_20738_comp67567_c0_seq1</i>  | GLPSTIP  | ISGSPALS  | YRVASSG | G-I-EHQ  | LPDROV  | NDNIWNS  |
| <i>CAOG_0021370</i>                               | QALIDSCV | IIVARPSAT | FYNSQ   | YPKQAQV  | TPHLYT  | SCRFLYAD |
| <i>CAOG_0598270</i>                               | QALIDSCV | IIVARPSAT | FYNSQ   | YPKQAQV  | TPHLYT  | SCRFLYAD |
| <i>CAOG_0993270</i>                               | QALIDSCV | IIVARPSAT | FYNSQ   | YPKQAQV  | TPHLYT  | SCRFLYAD |

**Supplemental Figure 11: Binding pocket alignment of mGABARs across metazoans**

Select residues involved in the binding of GABA are highlighted, and numbers correspond to the position in the human protein GABR1/GABAR-B1, based on the structure of GABR1 [Geng et al., 2013]. Highly conserved residues not thought to be involved in binding are highlighted in blue. The two human proteins are highlighted in pink. Placozoan proteins are highlighted in gray. Sponge proteins are highlighted in blue. The two ctenophore proteins are highlighted in violet.

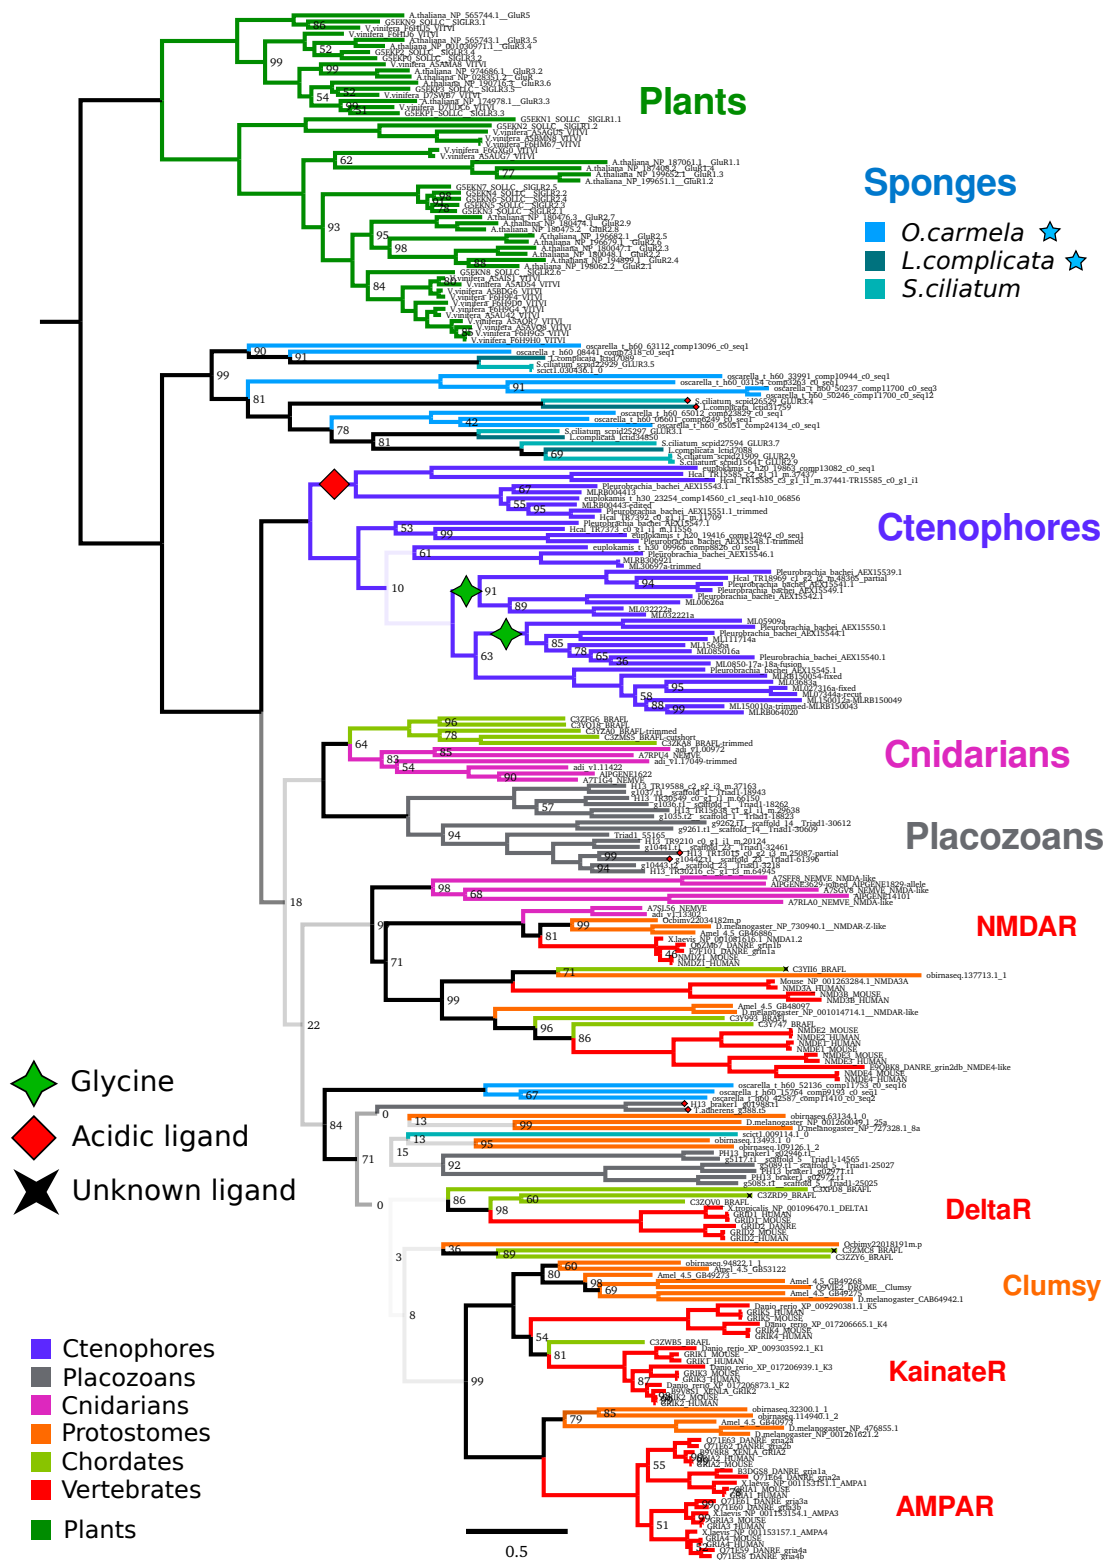

**Supplemental Figure 12: Phylogenetic tree of ionotropic glutamate receptors across metazoans**  
 Protein tree generated with RAxML using the PROTCATWAG model. Bootstrap values are 100 unless otherwise shown. These receptors are not found in the genomes or transcriptomes of demosponges or hexactinellids, so the Sponge clade refers to calcareous sponges and homoscleromorphs. For the three sponges, the blue star indicates sequences derived from a transcriptome. Based on [Alberstein et al., 2015], some receptors are predicted to bind ligands other than glutamate, shown with the green star, red diamond, and black star, for glycine, acidic ligands, and unknown, respectively. Four placozoan proteins have substitutions at the conserved acidic residue (D723 in human GluN1), as either GY in ctenophores, or GG/WY in placozoans; the carboxyl of the glutamic/aspartic acid is needed to coordinate the amino group of glutamate, suggesting that these proteins do not bind an  $\alpha$ -amino acid.



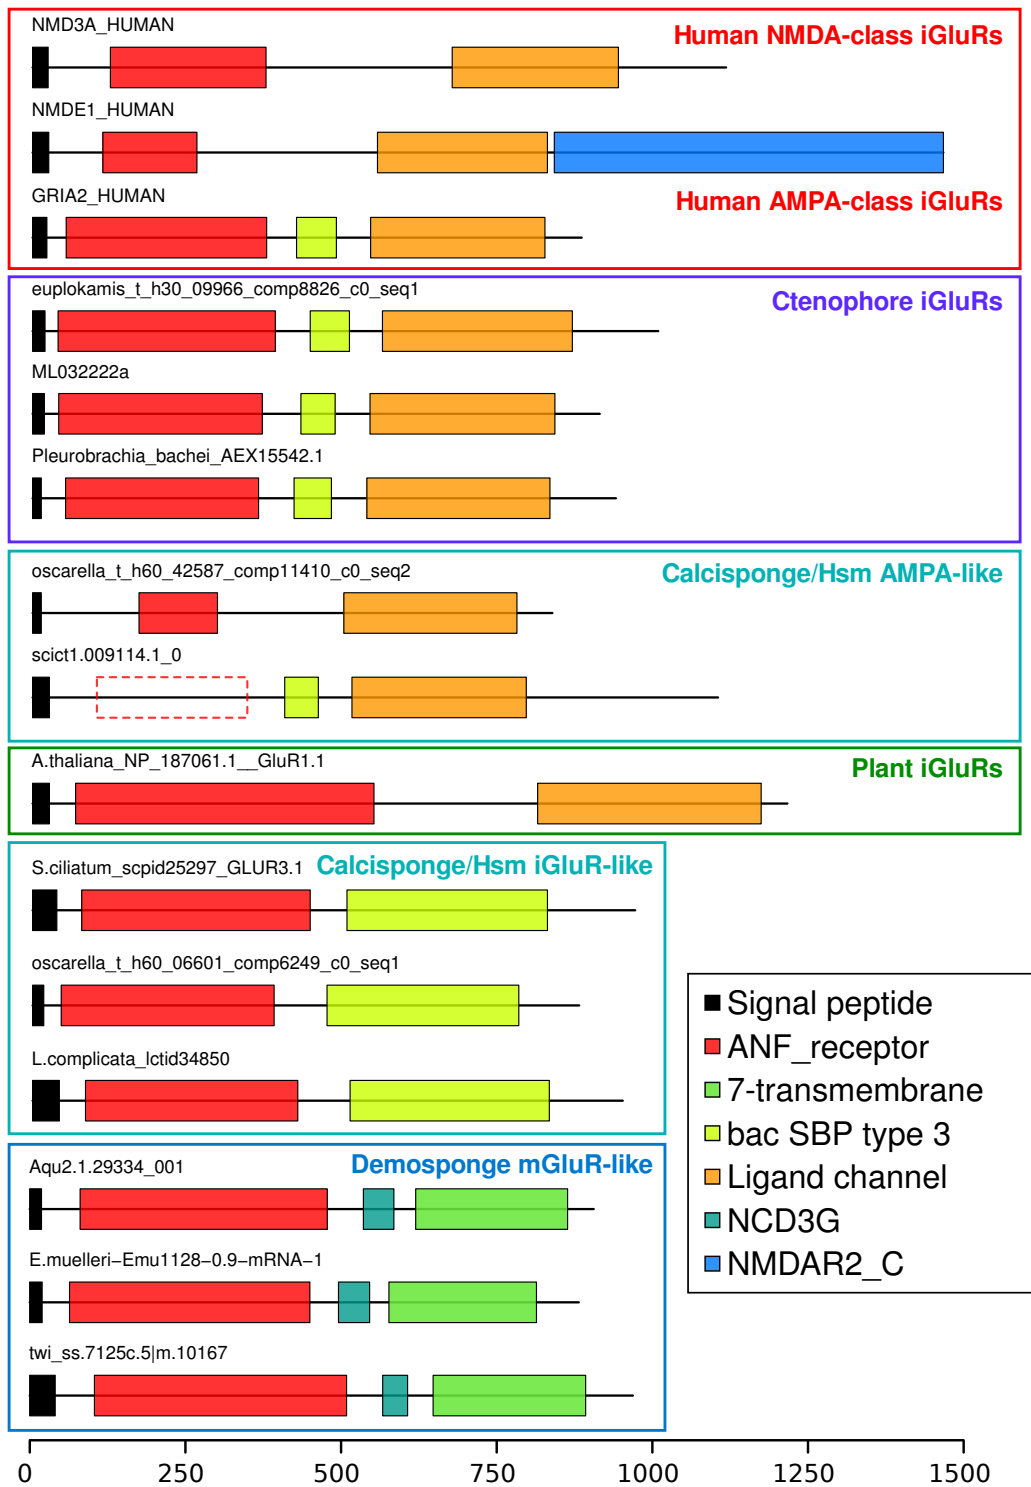

### Supplemental Figure 13: Domain organization of ionotropic glutamate receptors across meta-zoans

Scale bar displays number of amino acids. Top BLAST hits for human iGluRs in demosponges appear to be metabotropic, due to the presence of a 7-transmembrane domain instead of the ion channel, while the ligand-binding domain is conserved. Ctenophore iGluRs and some calcisponge/homoscleromorph (Hsm) proteins have the vertebrate-type domain organization, though the other calcisponge/homoscleromorph proteins (main sponge group in Supplemental Figure 12) have an SBP domain.

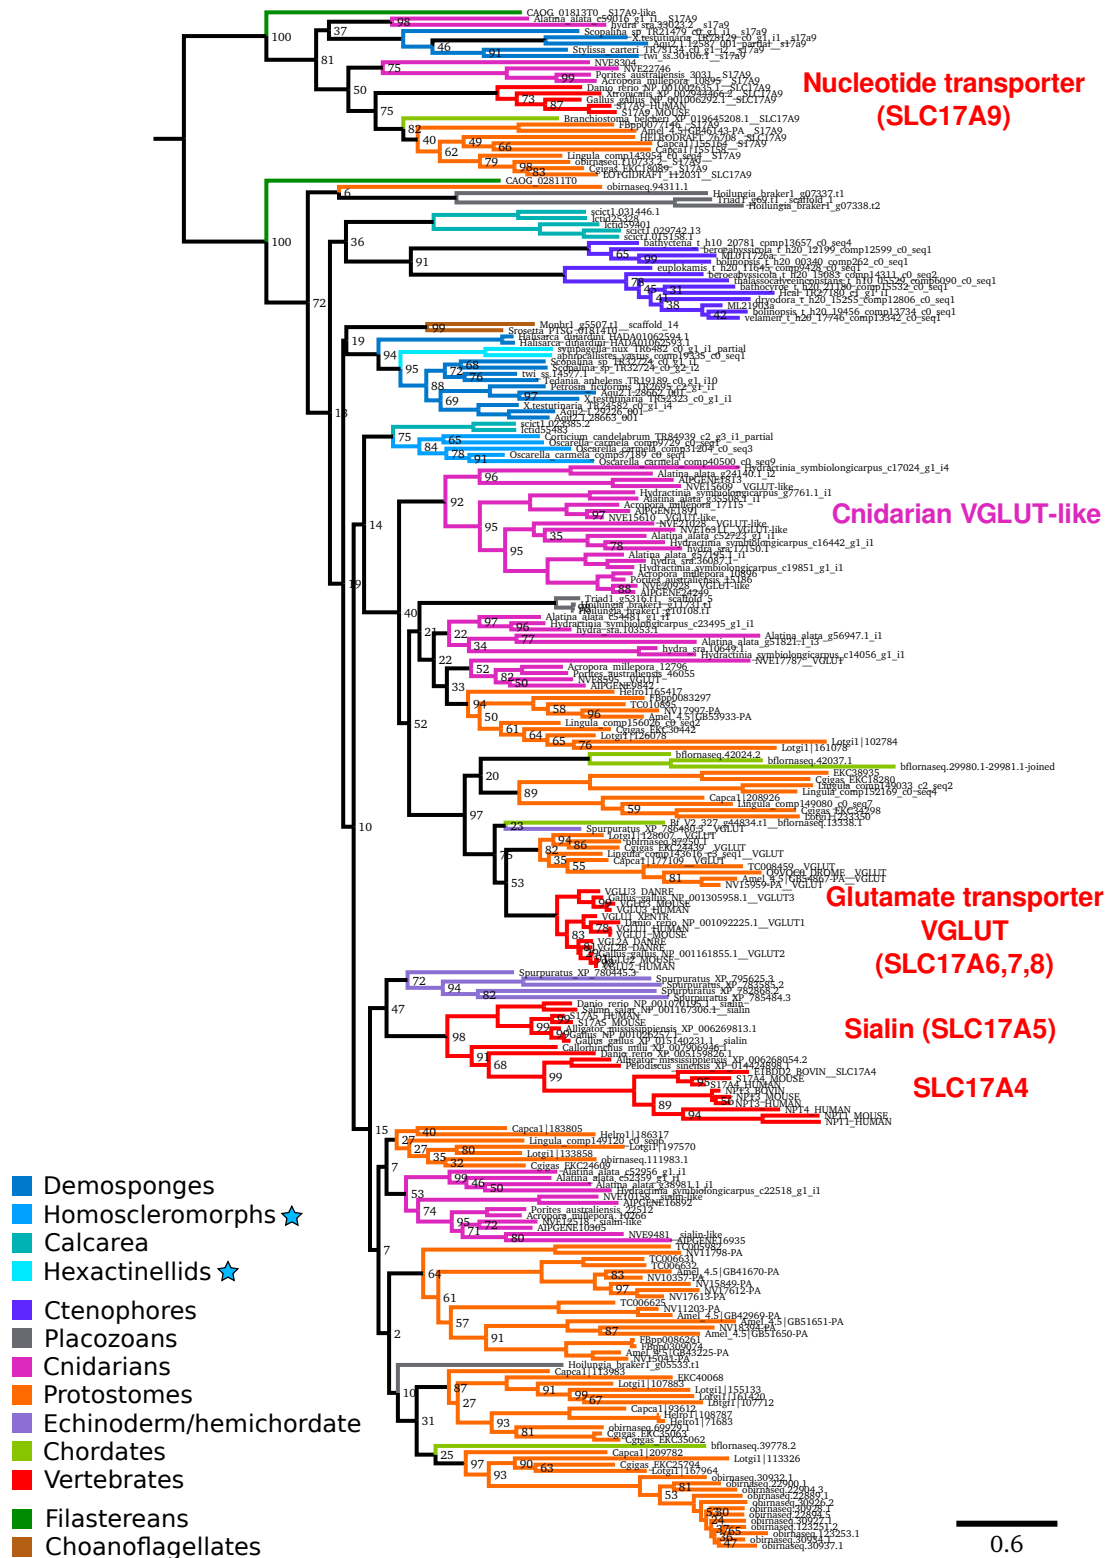

**Supplemental Figure 14: Vesicular glutamate transporter homologs across metazoans**  
 Tree of VGLUT (SLC17A6-8) proteins across all metazoan groups, generated with RAXML using the PROTGAMMALG model. Bootstrap values are 100 unless otherwise shown.

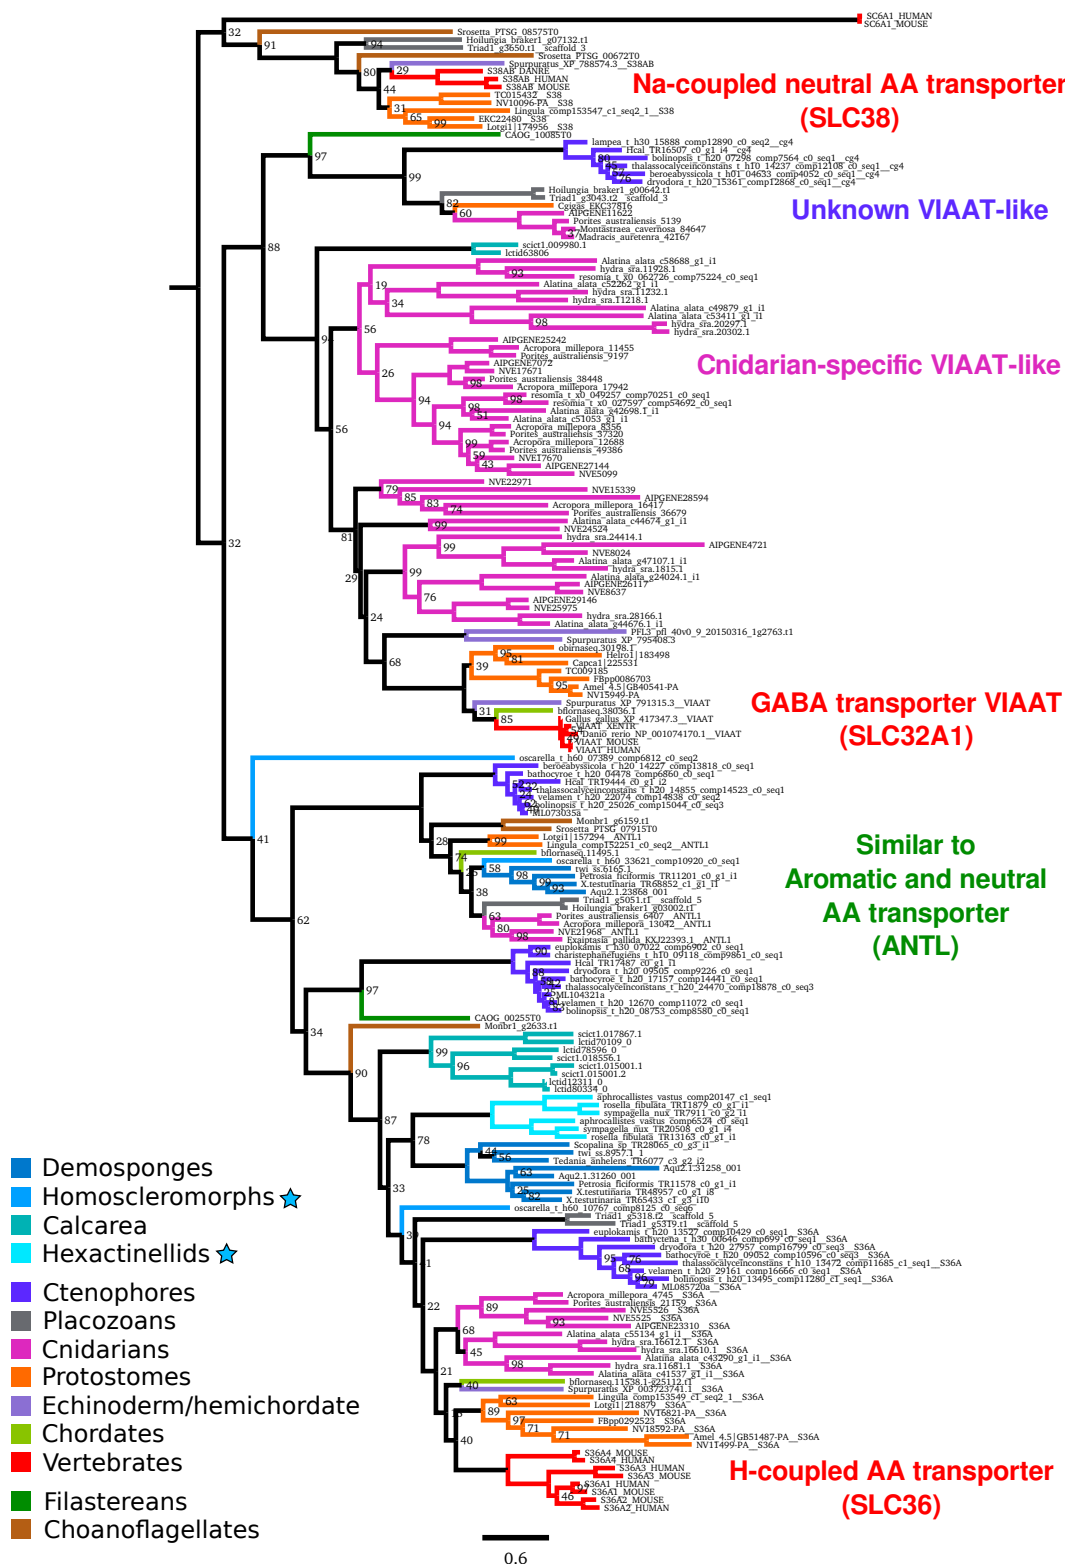

**Supplemental Figure 15: Vesicular inhibitory amino acid transporter homologs across metazoans**

Tree of VIAAT (SLC32A1) proteins and related transporters across all metazoan groups, generated with RAxML using the PROTGAMMALG model. Bootstrap values are 100 unless otherwise shown.

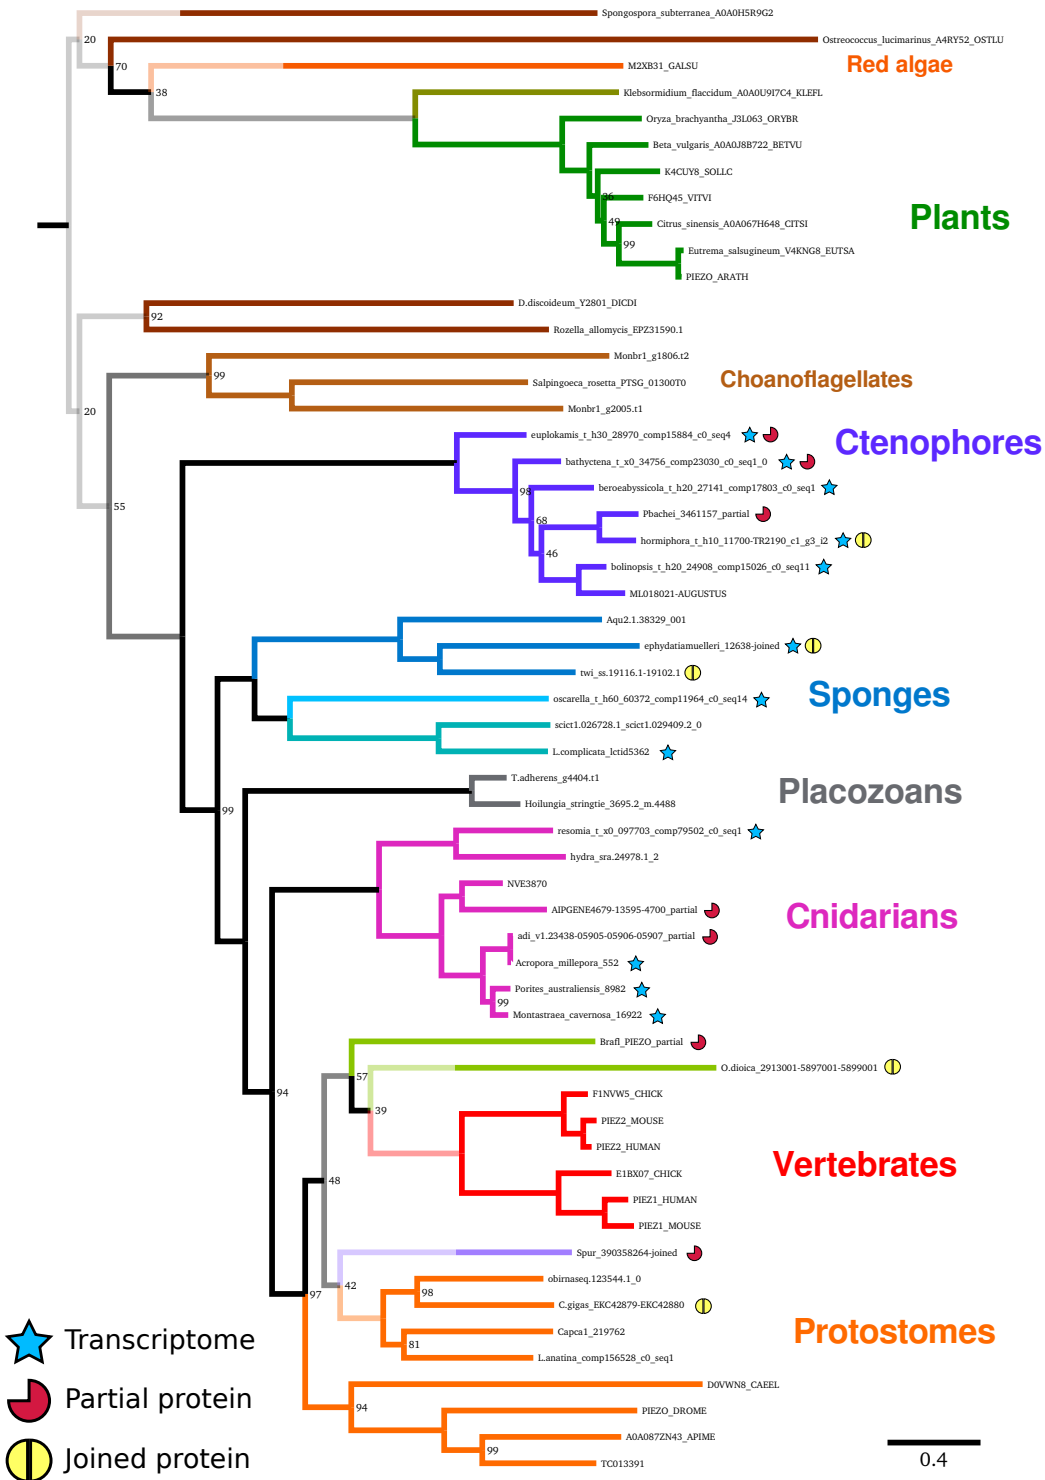

**Supplemental Figure 16: Phylogenetic tree of Piezo homologs across metazoans**

Protein tree generated with RAxML using the PROTCATWAG model and 100 bootstraps. Yellow circle indicates the sequence was complete when joined with other genes or partial sequences, red partial circle indicates the sequence is incomplete in the genome or transcriptome. A blue star indicates that the sequence derived from a transcriptome, so copy number cannot be determined with certainty. Bootstrap values are 100 unless otherwise shown.

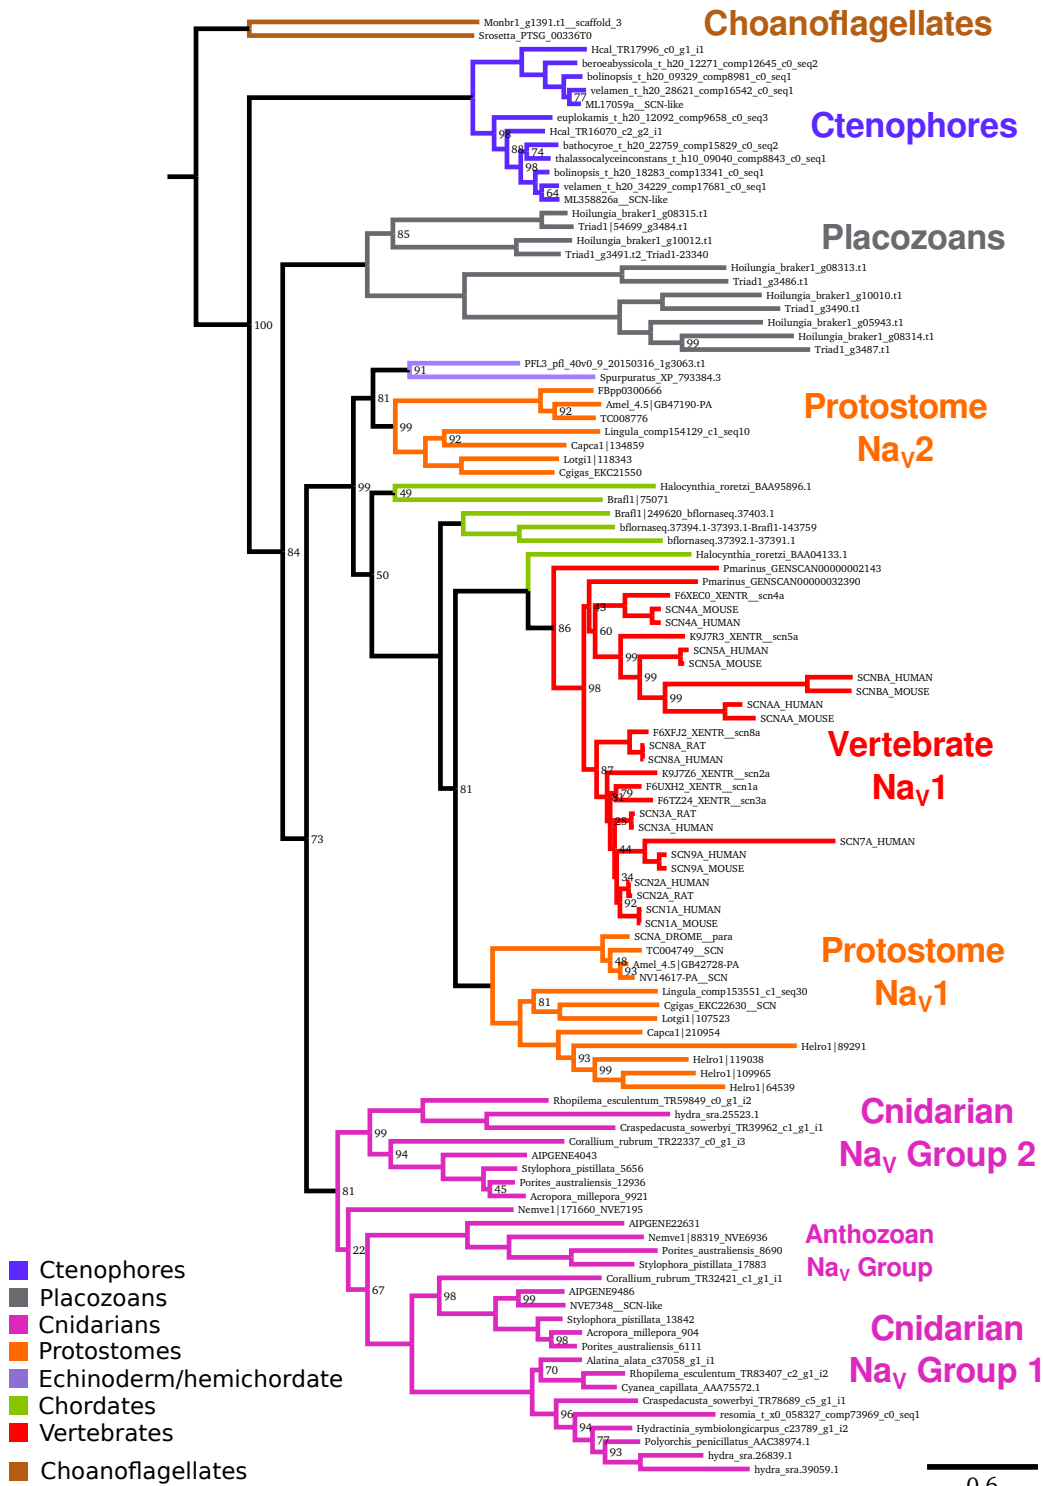

**Supplemental Figure 17: Phylogenetic tree of voltage-gated sodium channel alpha subunits across metazoans**

Protein tree generated with RAxML using the PROTGAMMALG model and 100 bootstraps. Bootstrap values are 100 unless otherwise shown.



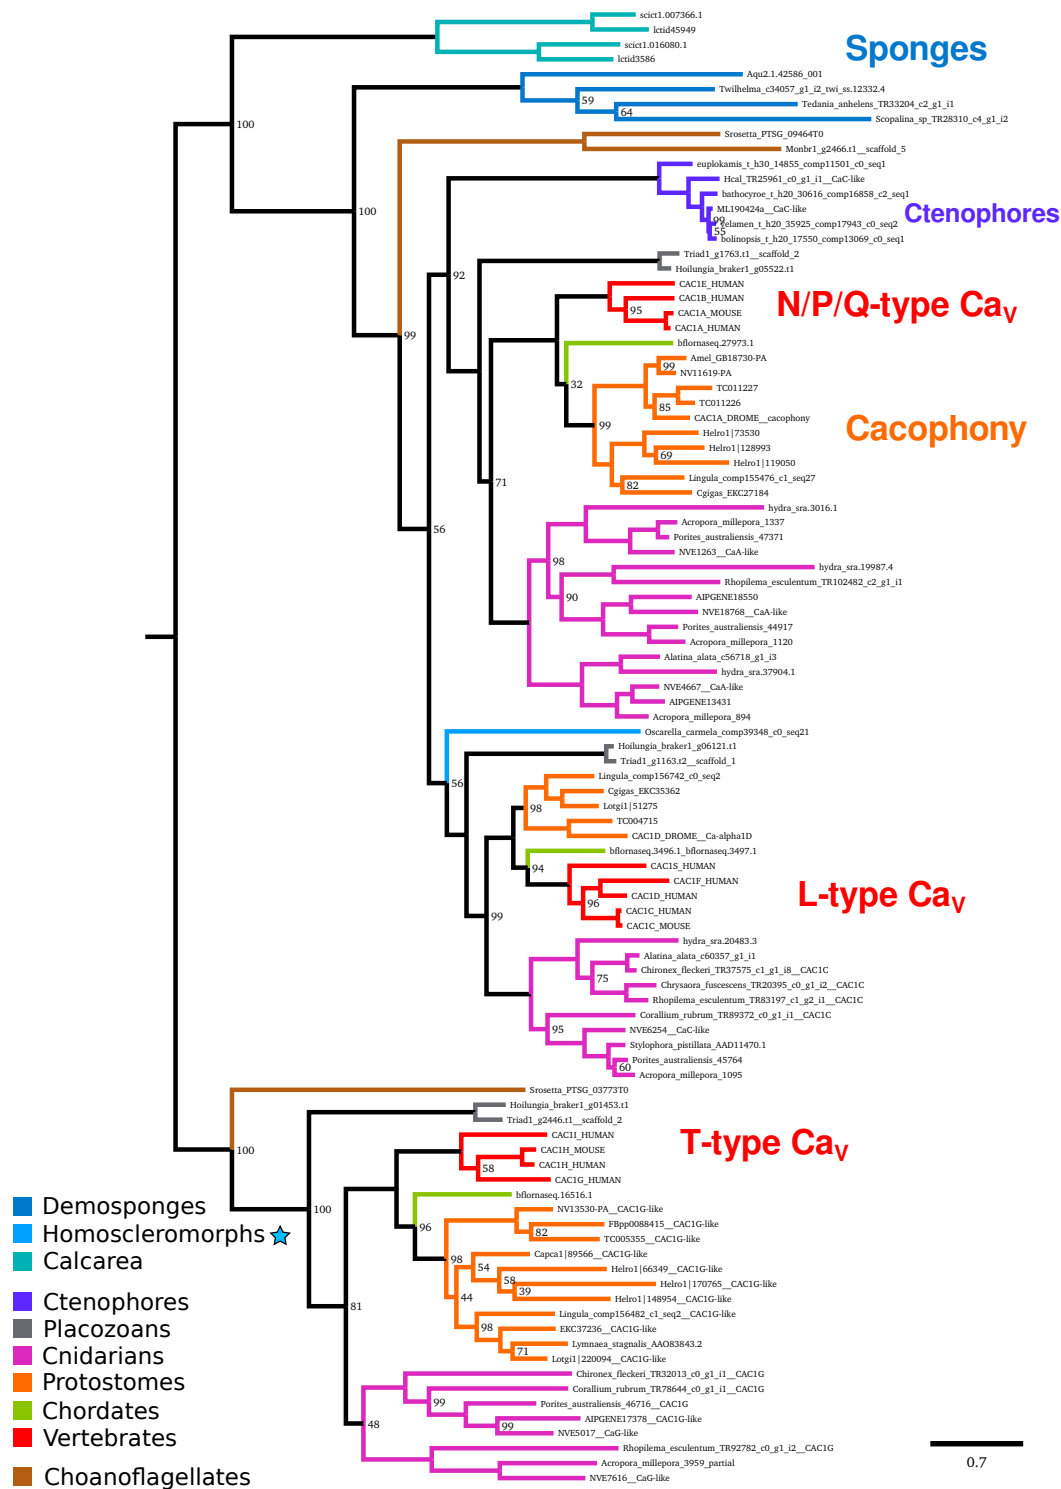

**Supplemental Figure 18: Phylogenetic tree of voltage-gated calcium channels across metazoans**  
 Protein tree generated with RAXML using the PROTGAMMALG model and 100 bootstraps. Bootstrap values are 100 unless otherwise shown.

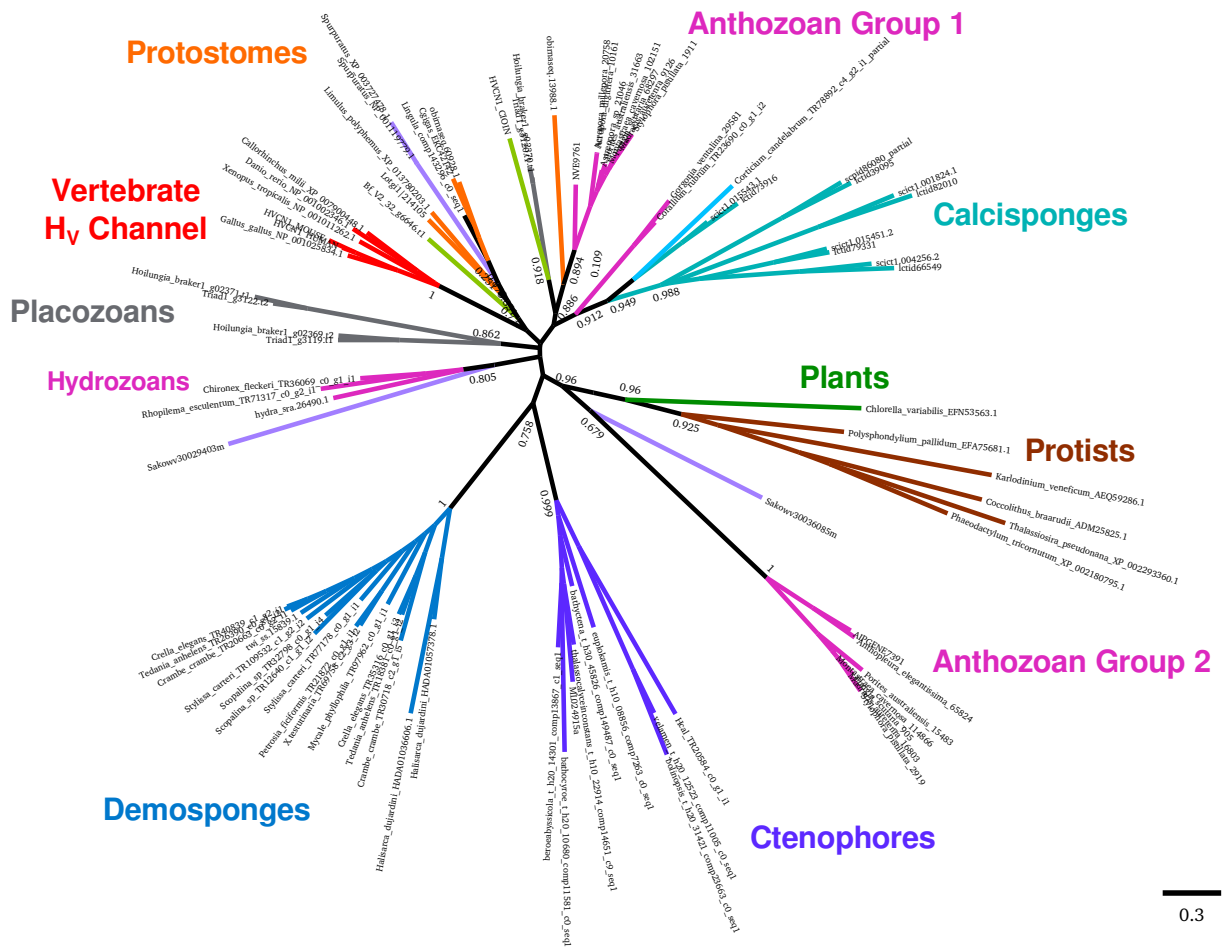

**Supplemental Figure 19: Phylogenetic tree of voltage-gated proton channels across metazoans**  
Protein tree generated with FastTree.

## 967 2 Supplemental Tables

**Supplemental Table 1: Summary statistics of the *Tethya wilhelma* genome. Holobiont genomic includes the sponge and all associated bacteria.**

| Feature                       | Type                      | Count       |
|-------------------------------|---------------------------|-------------|
| Assembly size (Mb)            | Sponge only               | 126.0       |
| Total gaps (Mb)               | Sponge only               | 1.348       |
| Estimated kmer coverage       | Sponge only               | 131x        |
| Estimated mapping coverage    | Sponge only               | 159.3x      |
| Number of contigs             | All                       | 6,907       |
| Number of contigs             | Sponge only               | 6,109       |
| Number of contigs             | Bacterial                 | 789         |
| GC %                          | Sponge only               | 39.98%      |
| Contig N50 (kb)               | All                       | 70.7        |
| Contig N50 (kb)               | Sponge only               | 73.4        |
| Contig N50 (kb)               | Bacterial                 | 48.2        |
| Genome size (bp)              | Mitochondrion             | 19,754      |
| Estimated mapping coverage    | Mitochondrion             | 669.6x      |
| GC %                          | Mitochondrion             | 34.43%      |
| Paired-end reads              | Holobiont genomic 100bp   | 259,518,468 |
| Total paired-end bases (Gb)   | Holobiont genomic         | 25.951      |
| Reads aligning back to genome | All contigs               | 214,103,768 |
| Mate-pair reads               | Holobiont genomic 125bp   | 280,837,536 |
| Total mate-pair bases (Gb)    | Holobiont genomic         | 35.104      |
| Moleculo (TruSeq) long reads  | Holobiont genomic         | 125,150     |
| Total Moleculo bases (Mb)     | Holobiont genomic         | 436.7       |
| Paired-end RNA-seq reads      | dUTP Stranded             | 201,451,574 |
| Paired-end RNA-seq bases (Gb) | dUTP Stranded             | 25.181      |
| Trinity                       | De novo transcripts       | 127,012     |
| RNA-seq mapping fraction      | All contigs               | 68.3%       |
| StringTie                     | Genome guided transcripts | 46,572      |

**Supplemental Table 2: Summary of splice variation for the genome-guided transcriptome for *T. wilhelma* (Twi) and transcript set v2.0 for *A. queenslandica* (Aqu).**

| Splice Type                 | Twi transcripts | Twi events/exons | Aqu transcripts | Aqu events/exons |
|-----------------------------|-----------------|------------------|-----------------|------------------|
| Cassette exons              | 4779            | 9089             | 3591            | 5535             |
| Canonical splicing          | 5049            | -                | 2602            | -                |
| Skipped exons               | 3868            | 8329             | 1022            | 721              |
| Alternative splice acceptor | -               | 3747             | -               | 638              |
| Intron retention            | 3295            | 3565             | 3437            | 3400             |
| Alternative splice donor    | -               | 3264             | -               | 521              |
| Alternative N-terminus      | 1964            | -                | 1965            | -                |
| Alternative C-terminus      | 1788            | -                | 1968            | -                |
| Intronic start              | 471             | -                | 571             | -                |
| Intronic end                | 285             | -                | 592             | -                |
| Non-canonical               | 73              | -                | 135             | -                |
| Single exon with variants   | 246             | -                | 13              | -                |
| No variants                 | 12088           | -                | 24027           | -                |
| Single exon and no variants | 15421           | -                | 12400           | -                |

**Supplemental Table 3: Skipped exon and retained intron frame, for *T. wilhelma* (Twi) and *A. queenslandica* (Aqu). Skipped exons tend to have lengths as multiples of three.**

| Feature              | Position 1 | Position 2 | Position 3 |
|----------------------|------------|------------|------------|
| Twi Skipped exons    | 6904       | 5179       | 5331       |
| Twi Retained introns | 1202       | 1204       | 1159       |
| Aqu Skipped exons    | 2671       | 1914       | 1972       |
| Aqu Retained introns | 1244       | 1092       | 1101       |
